# Supplementary material for: A simple and efficient method for the preparation of 5-hydroxy-3-acyltetramic acids
Source: publisher site journal article supplement (doi:10.3762/bjoc.11.37), 2015-03-06

**Supporting Information**  
**for**  
**A simple and efficient method for the preparation of**  
**5-hydroxy-3-acyltetramic acids**

Johanna Trenner<sup>1</sup>, Evgeny V. Prusov\*<sup>1</sup>

Address: <sup>1</sup>Department of Medicinal Chemistry, Helmholtz Centre for Infection Research, Inhoffenstr. 7, 38124 Braunschweig, Germany

Email: Evgeny V. Prusov - [evgeny.prusov@helmholtz-hzi.de](mailto:evgeny.prusov@helmholtz-hzi.de)

\* Corresponding author

**Copies of NMR spectra**

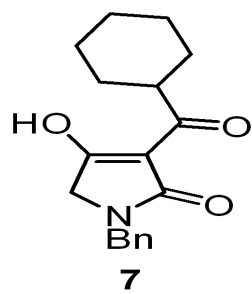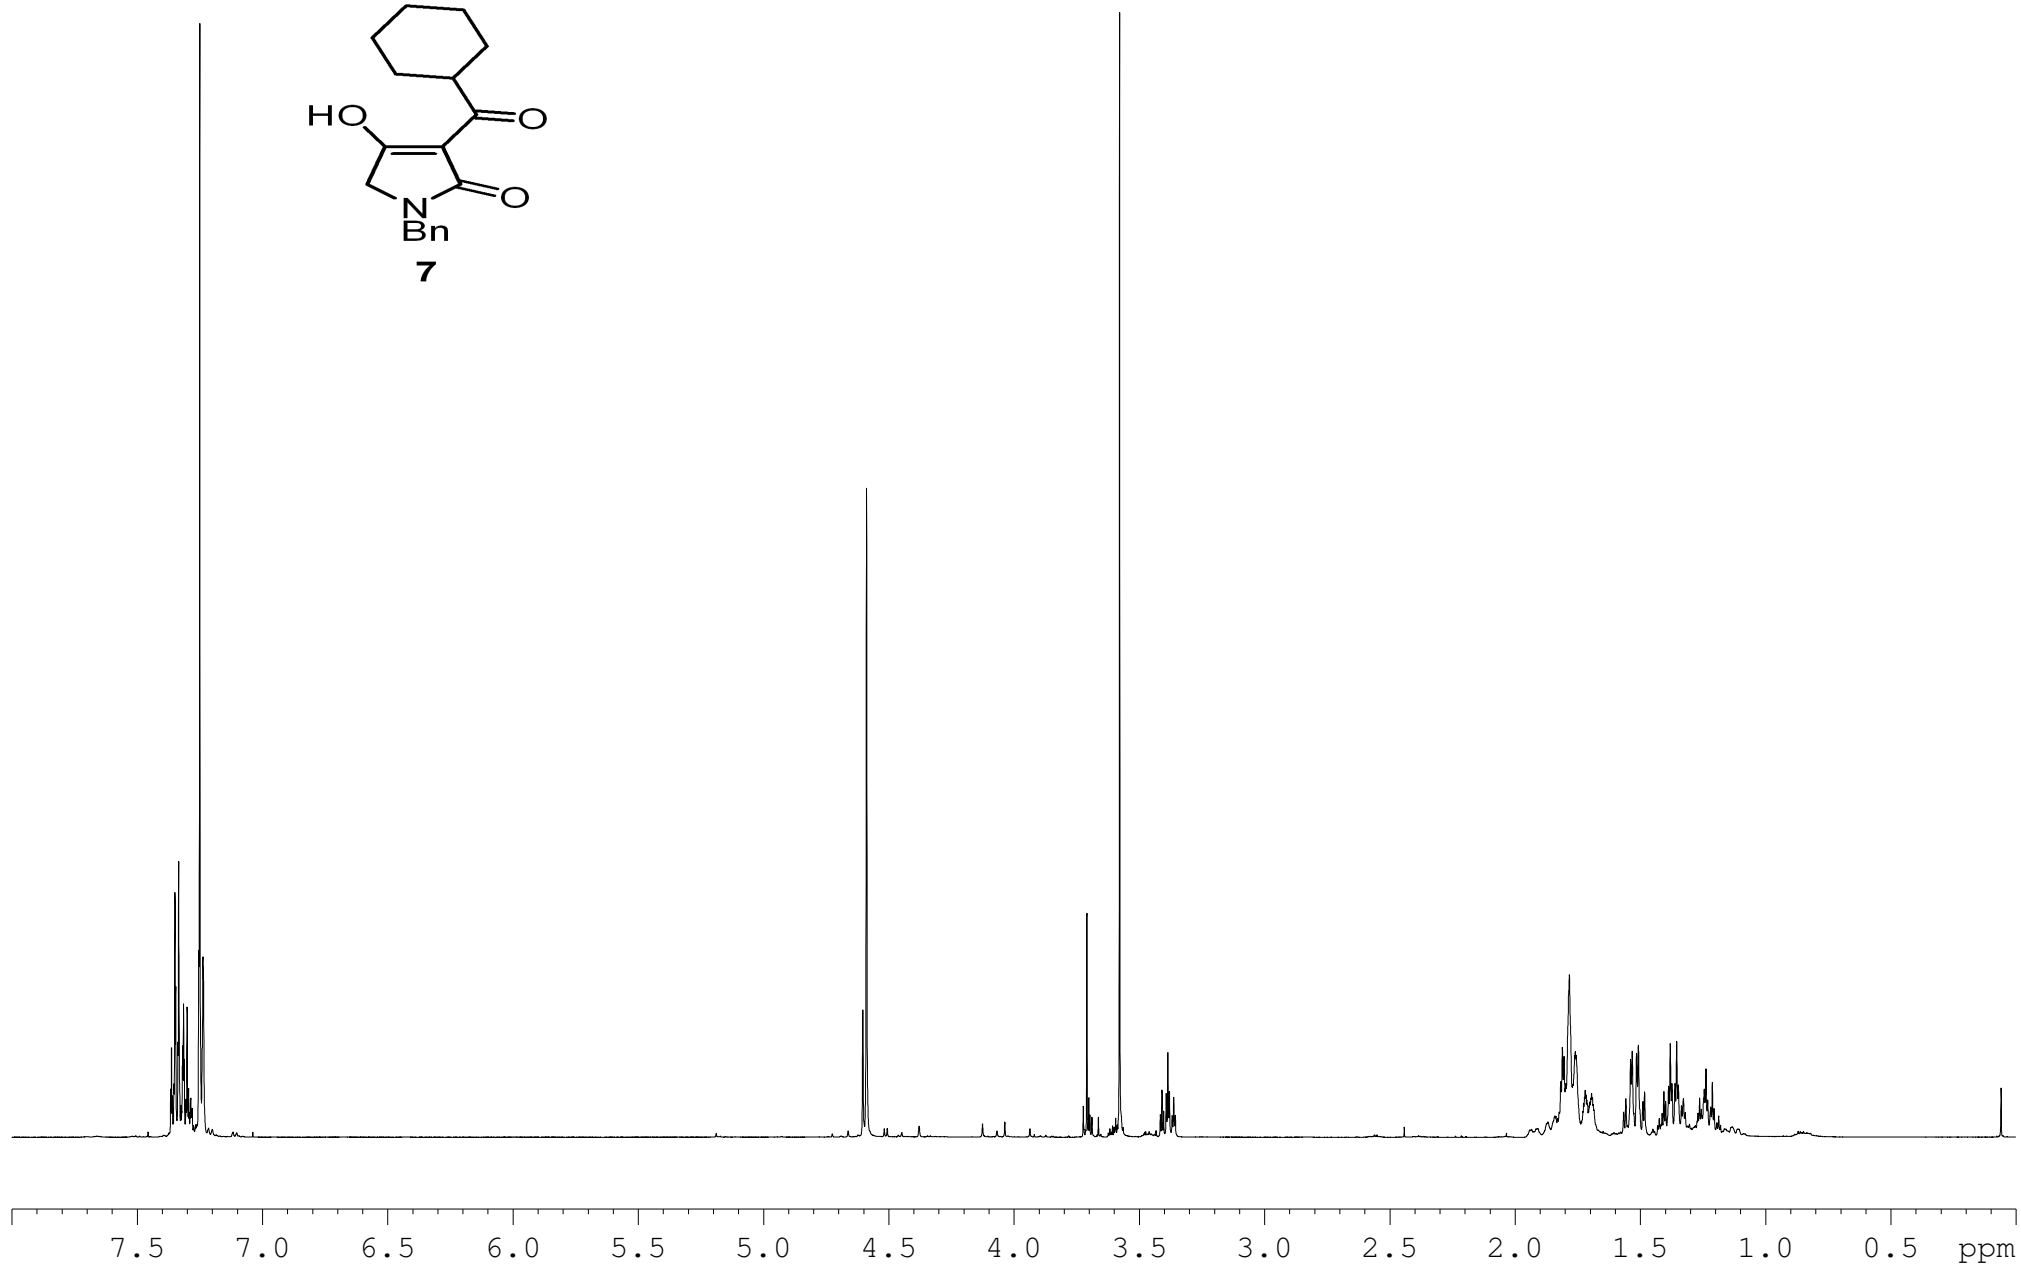

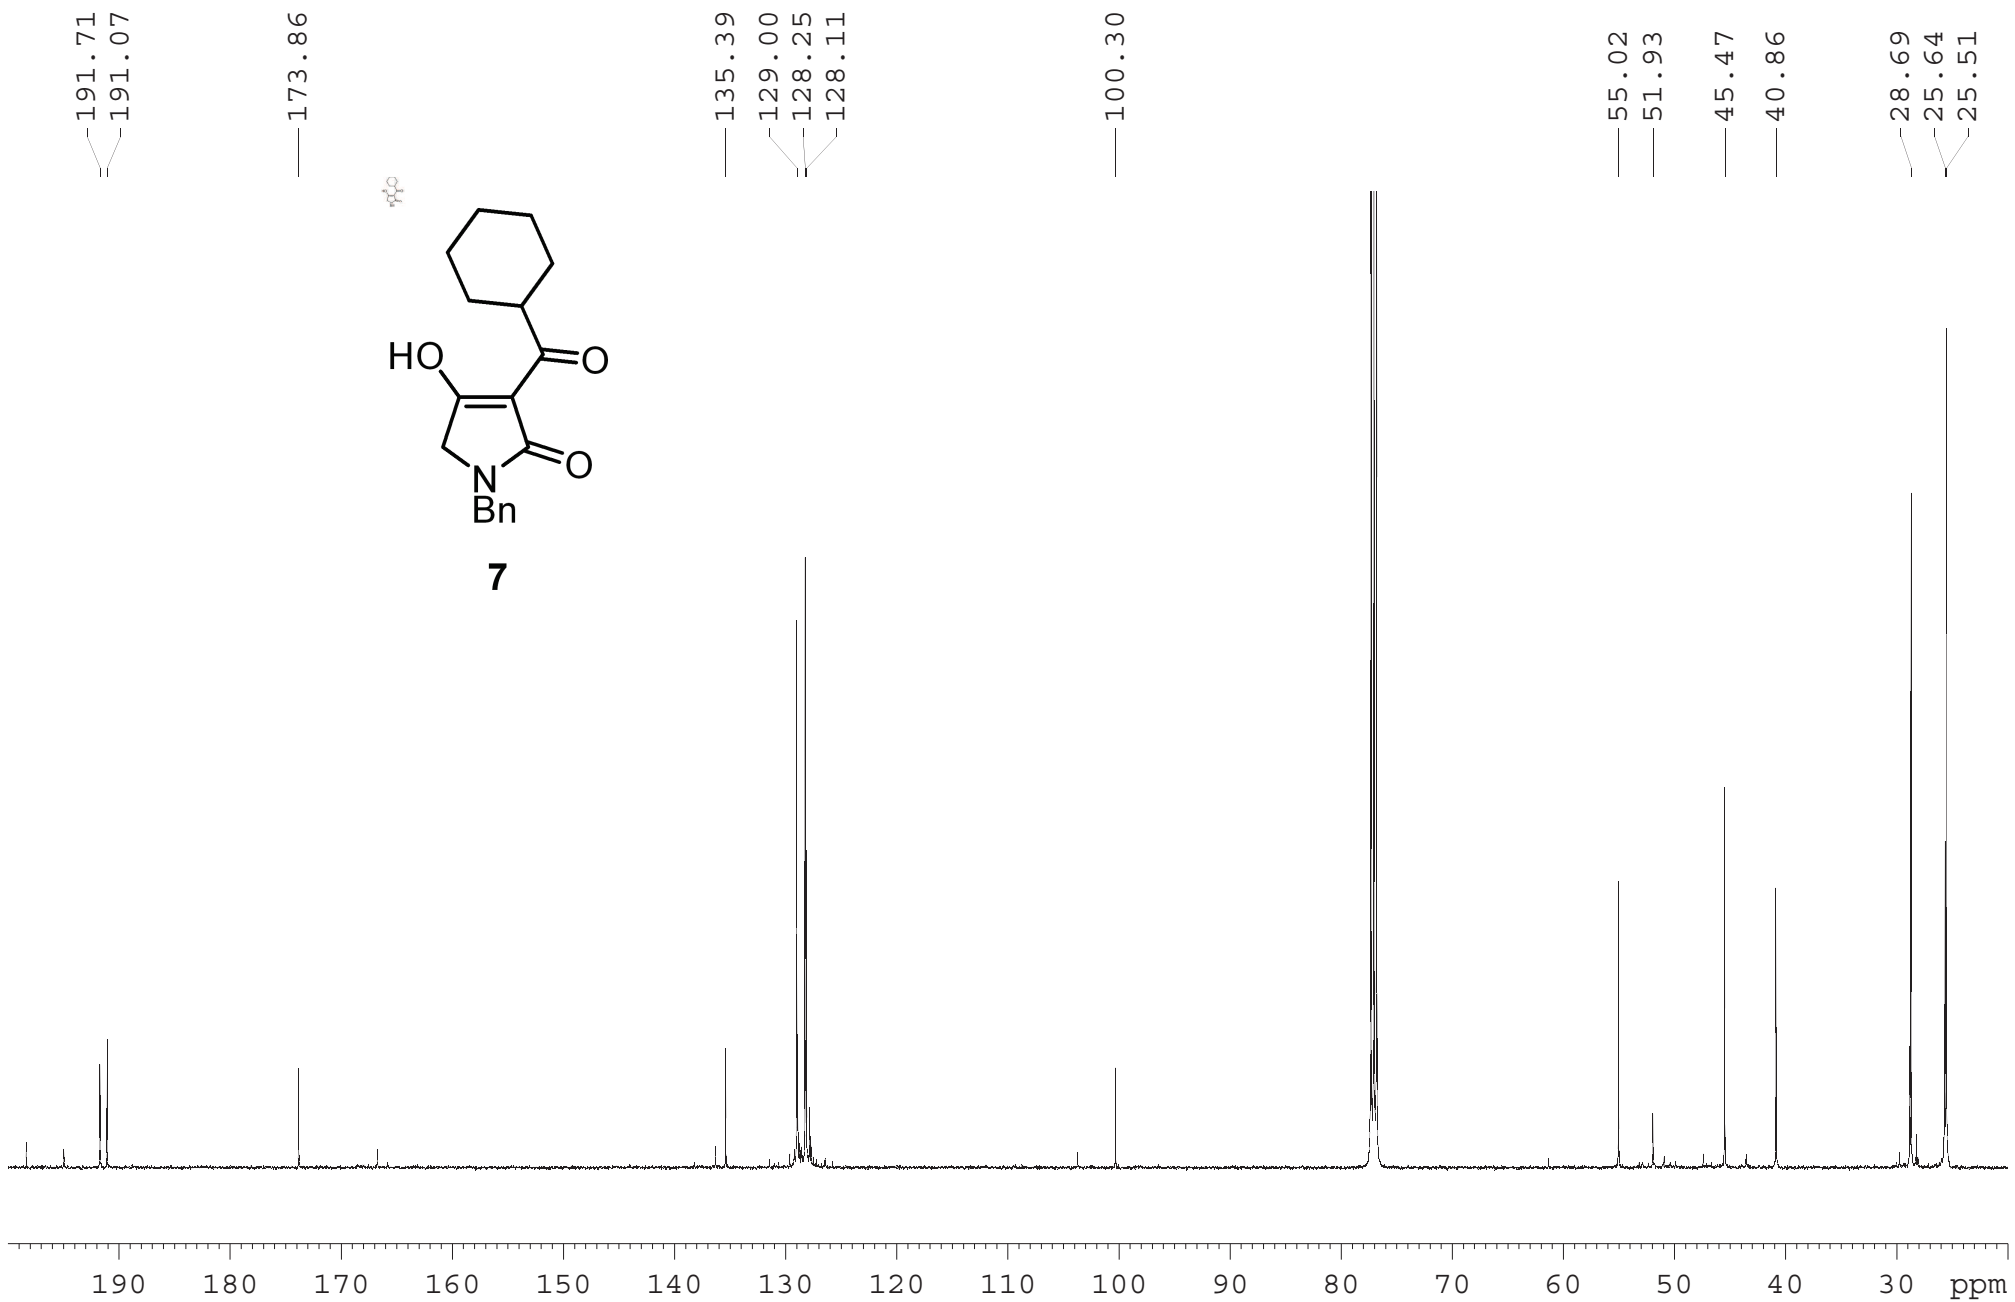

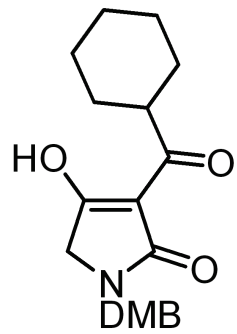

**8**

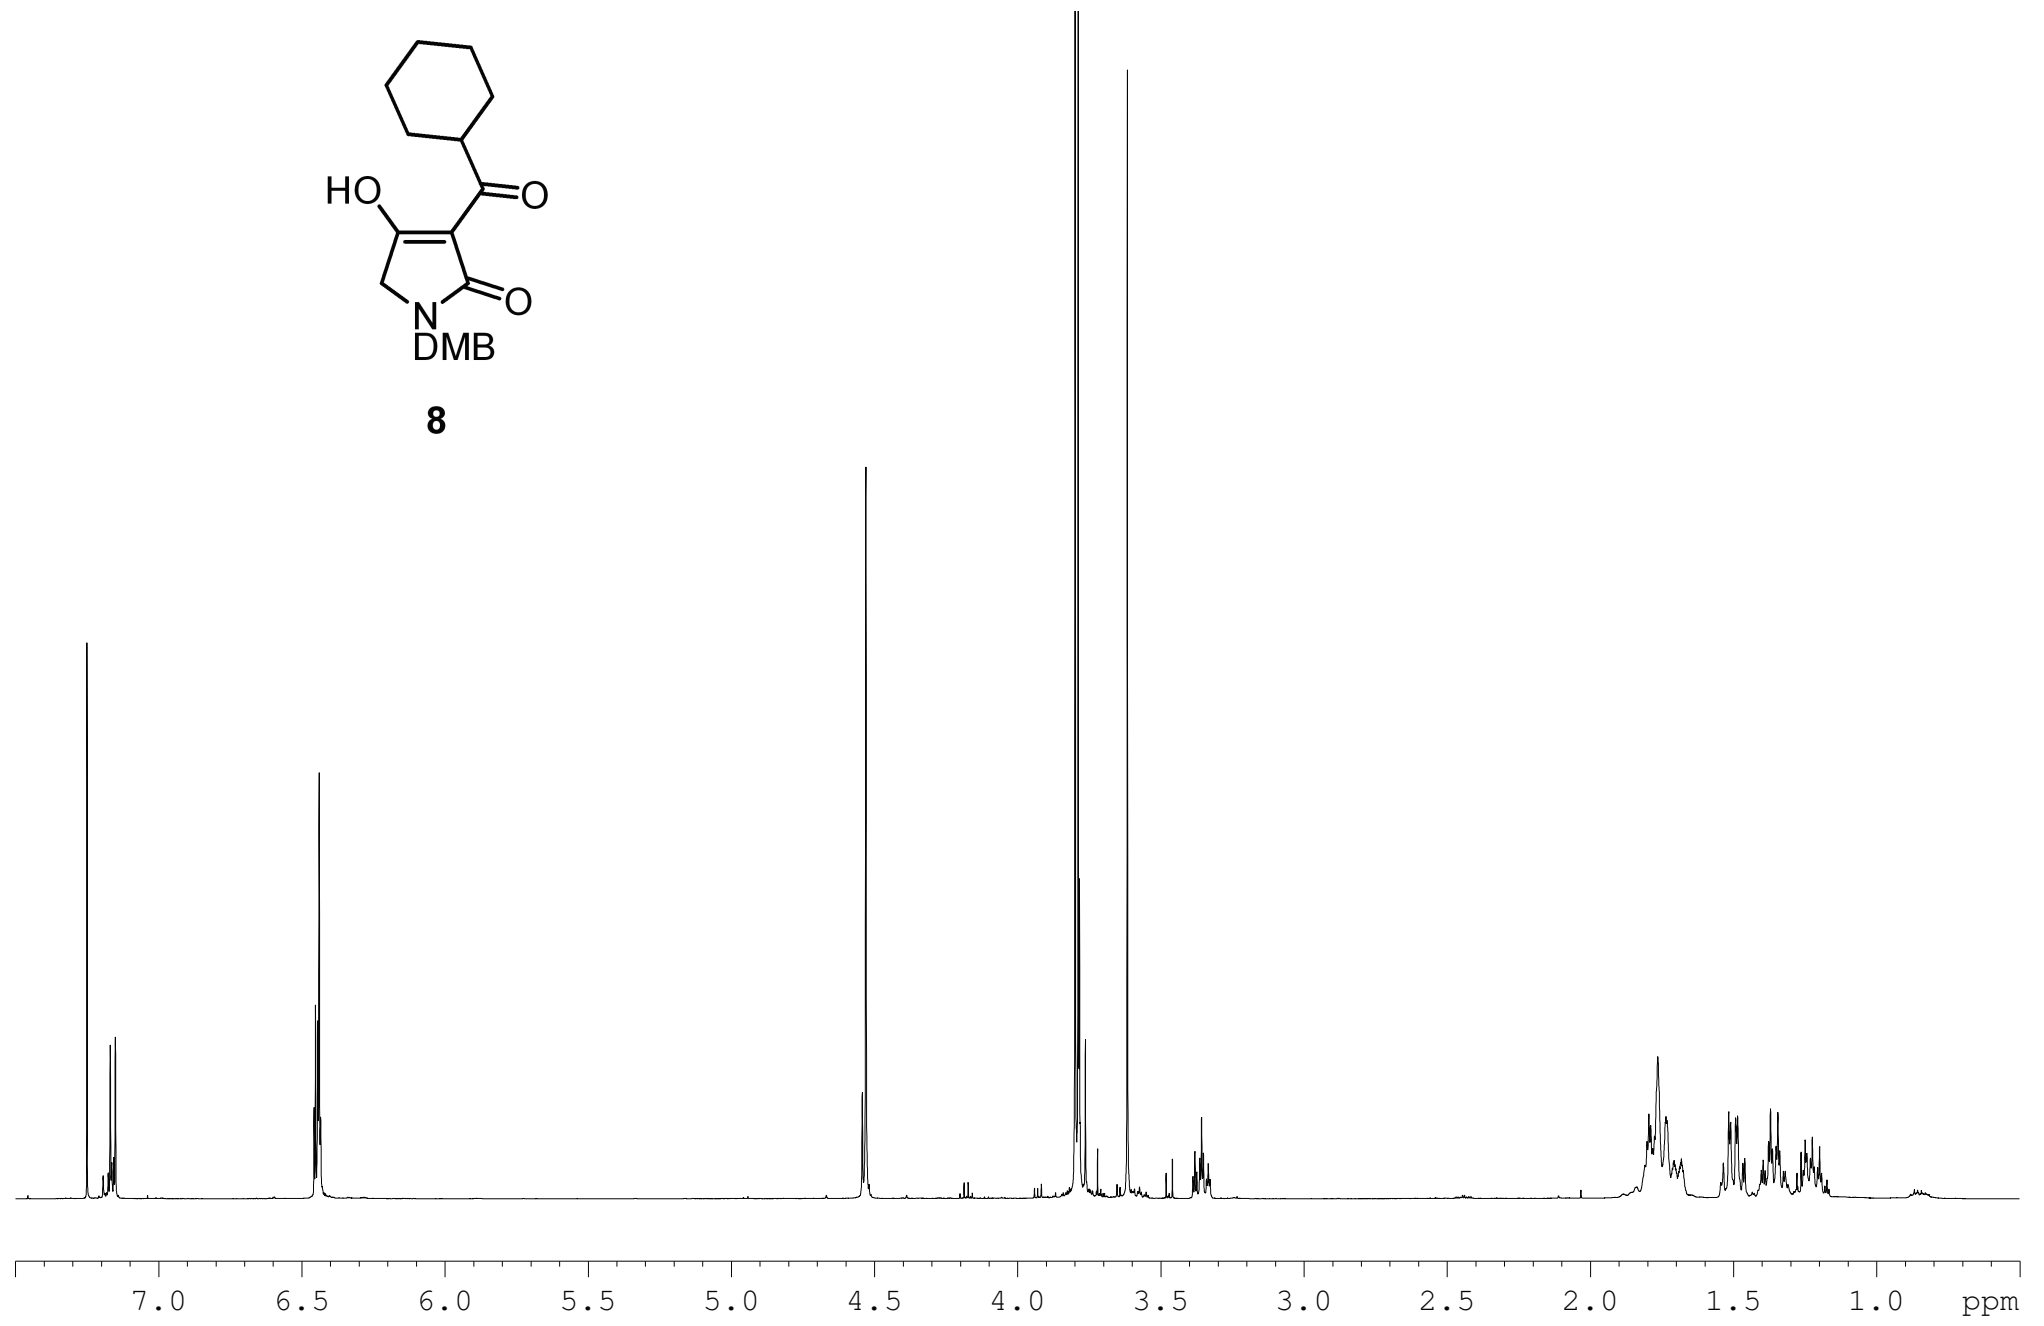

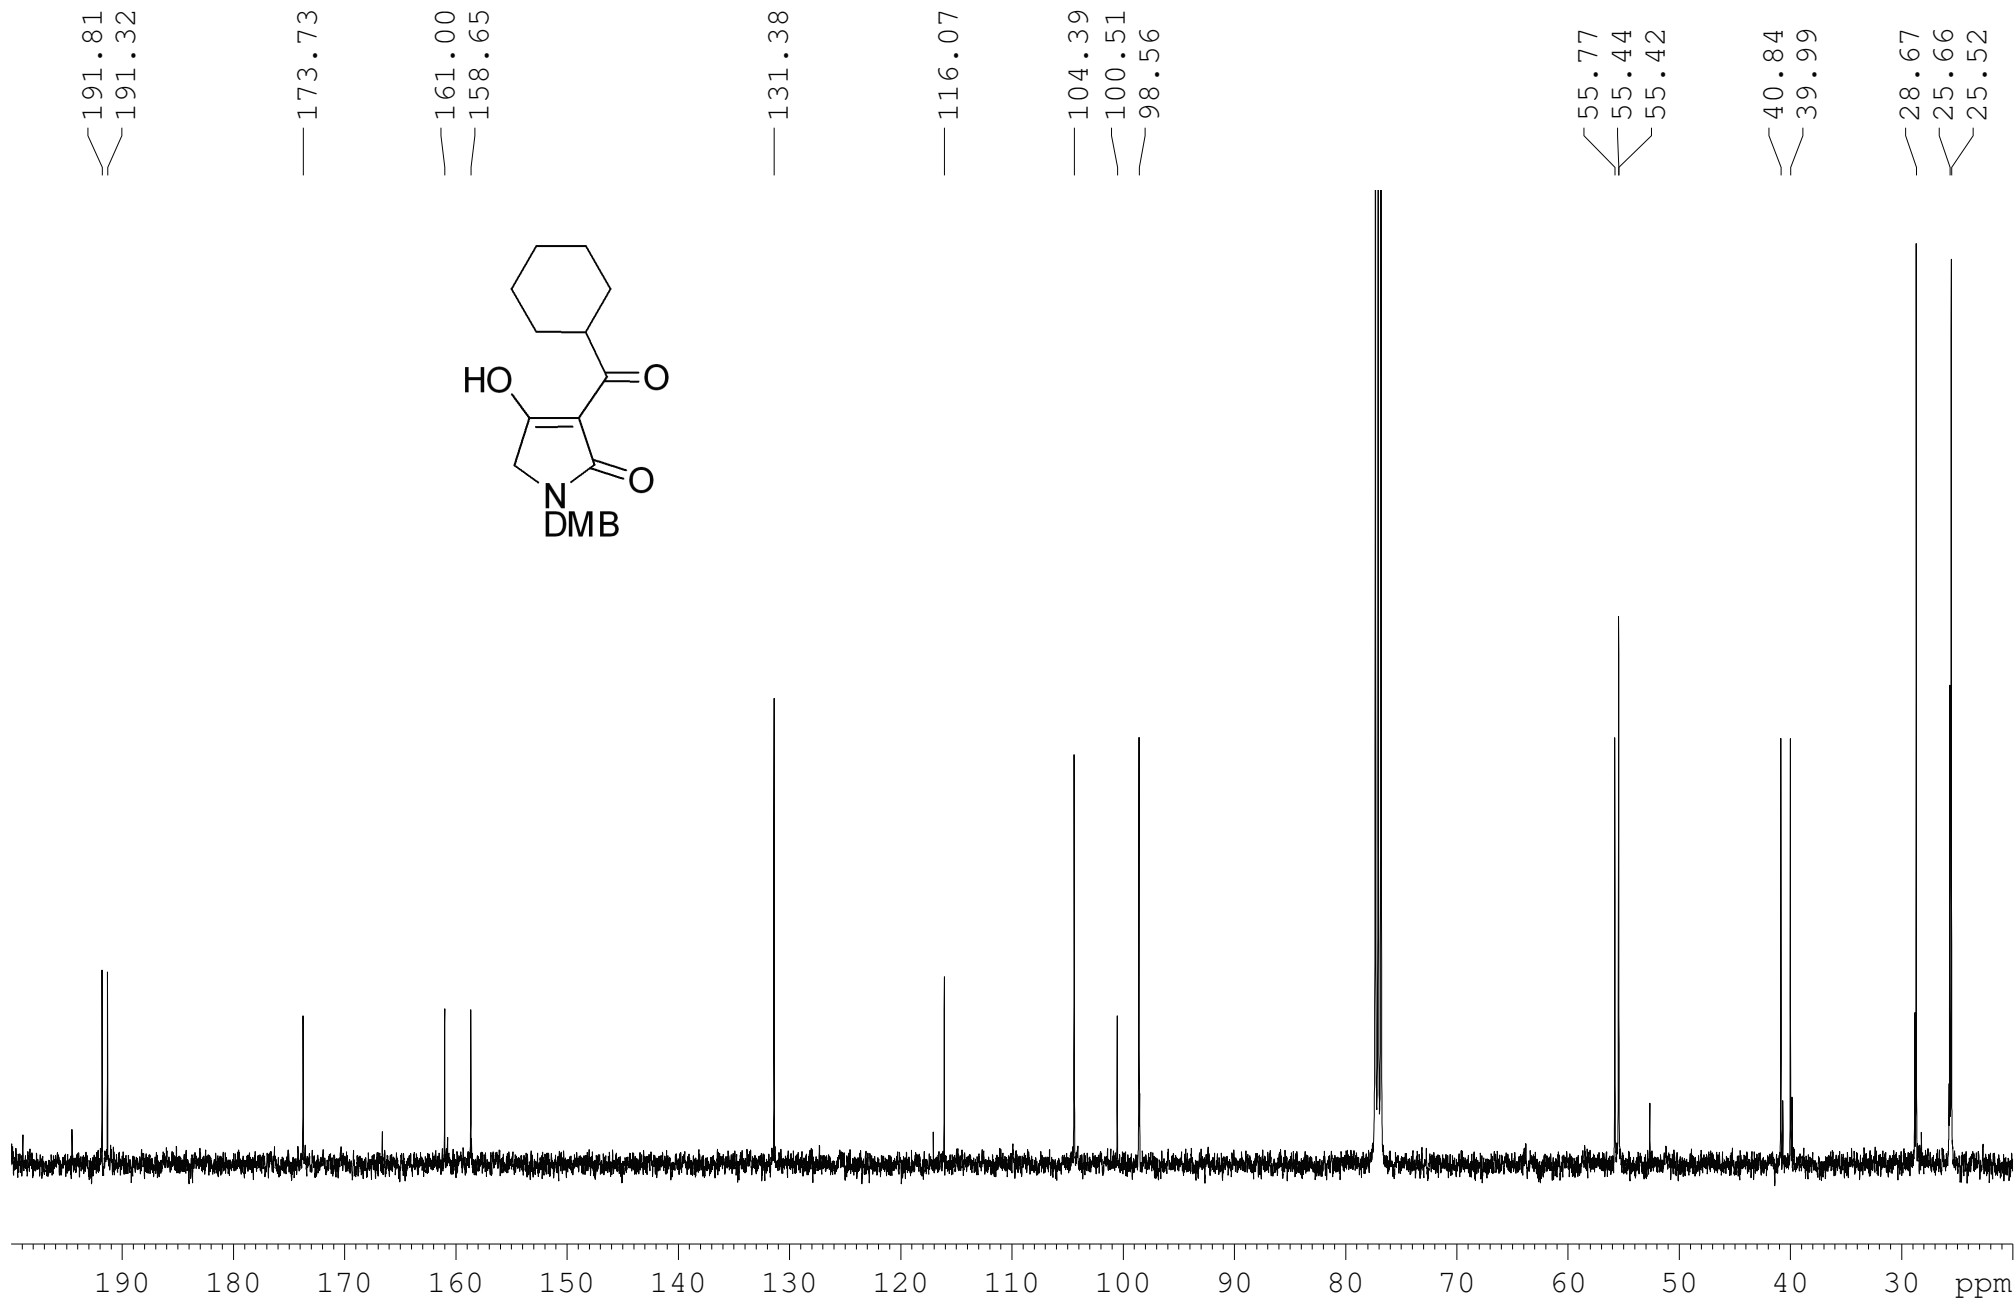

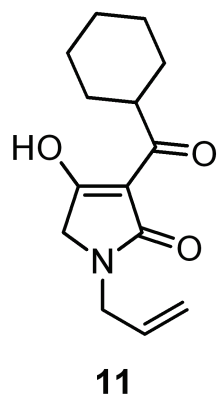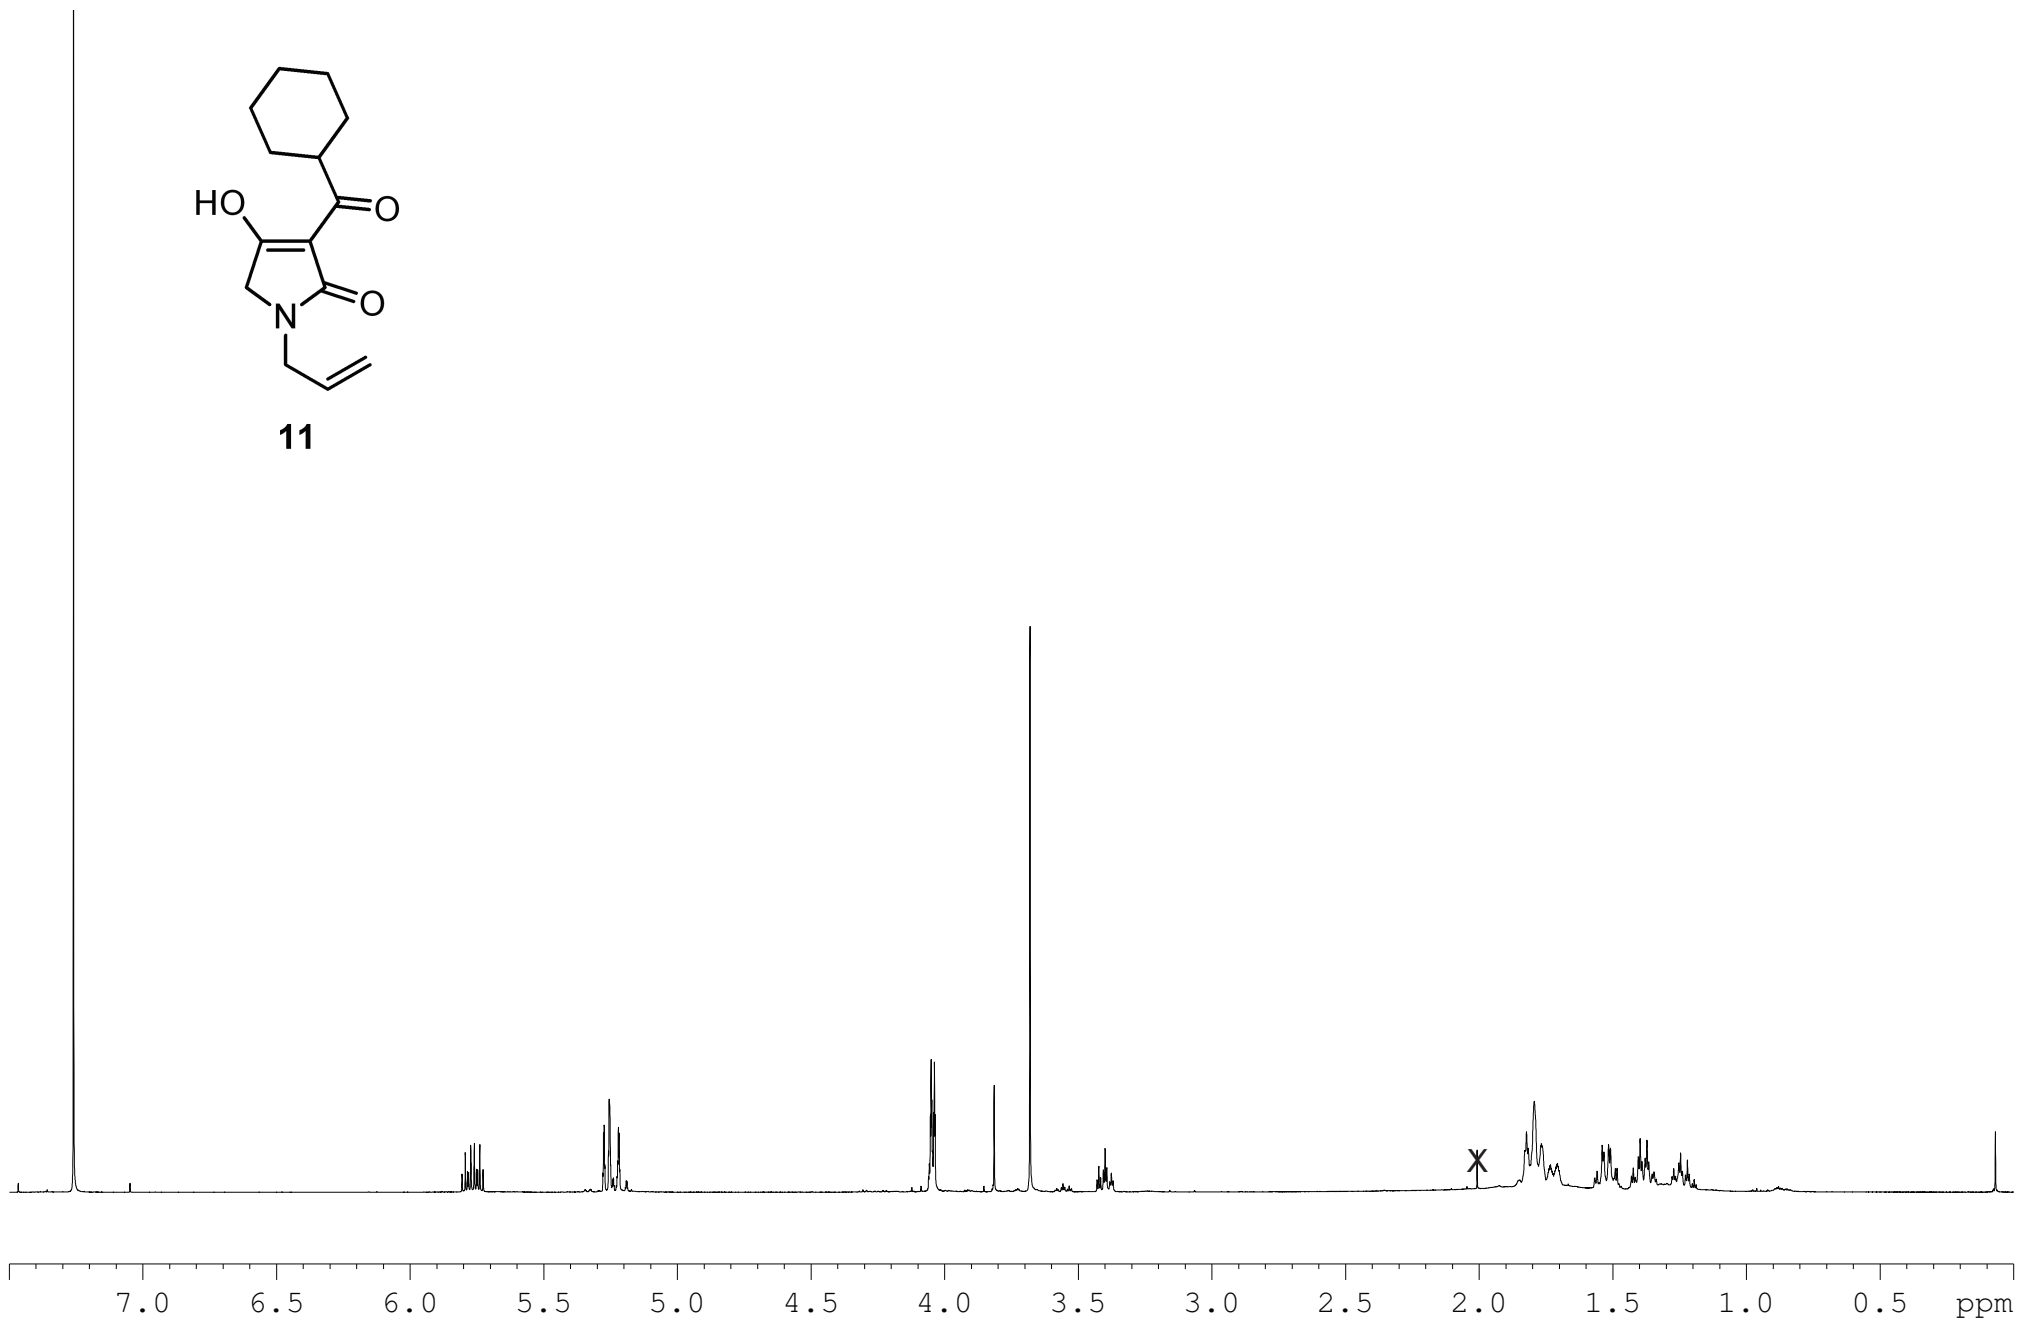

< 191.67  
< 191.16

— 173.75

< 132.35  
< 131.48

< 119.00  
< 118.40

— 100.34

— 55.14  
— 52.02

— 44.00  
— 40.83

< 28.64  
< 25.60  
< 25.48

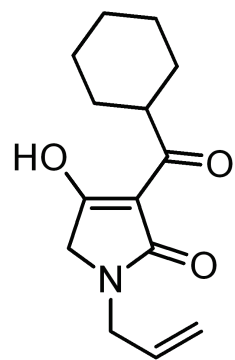

11

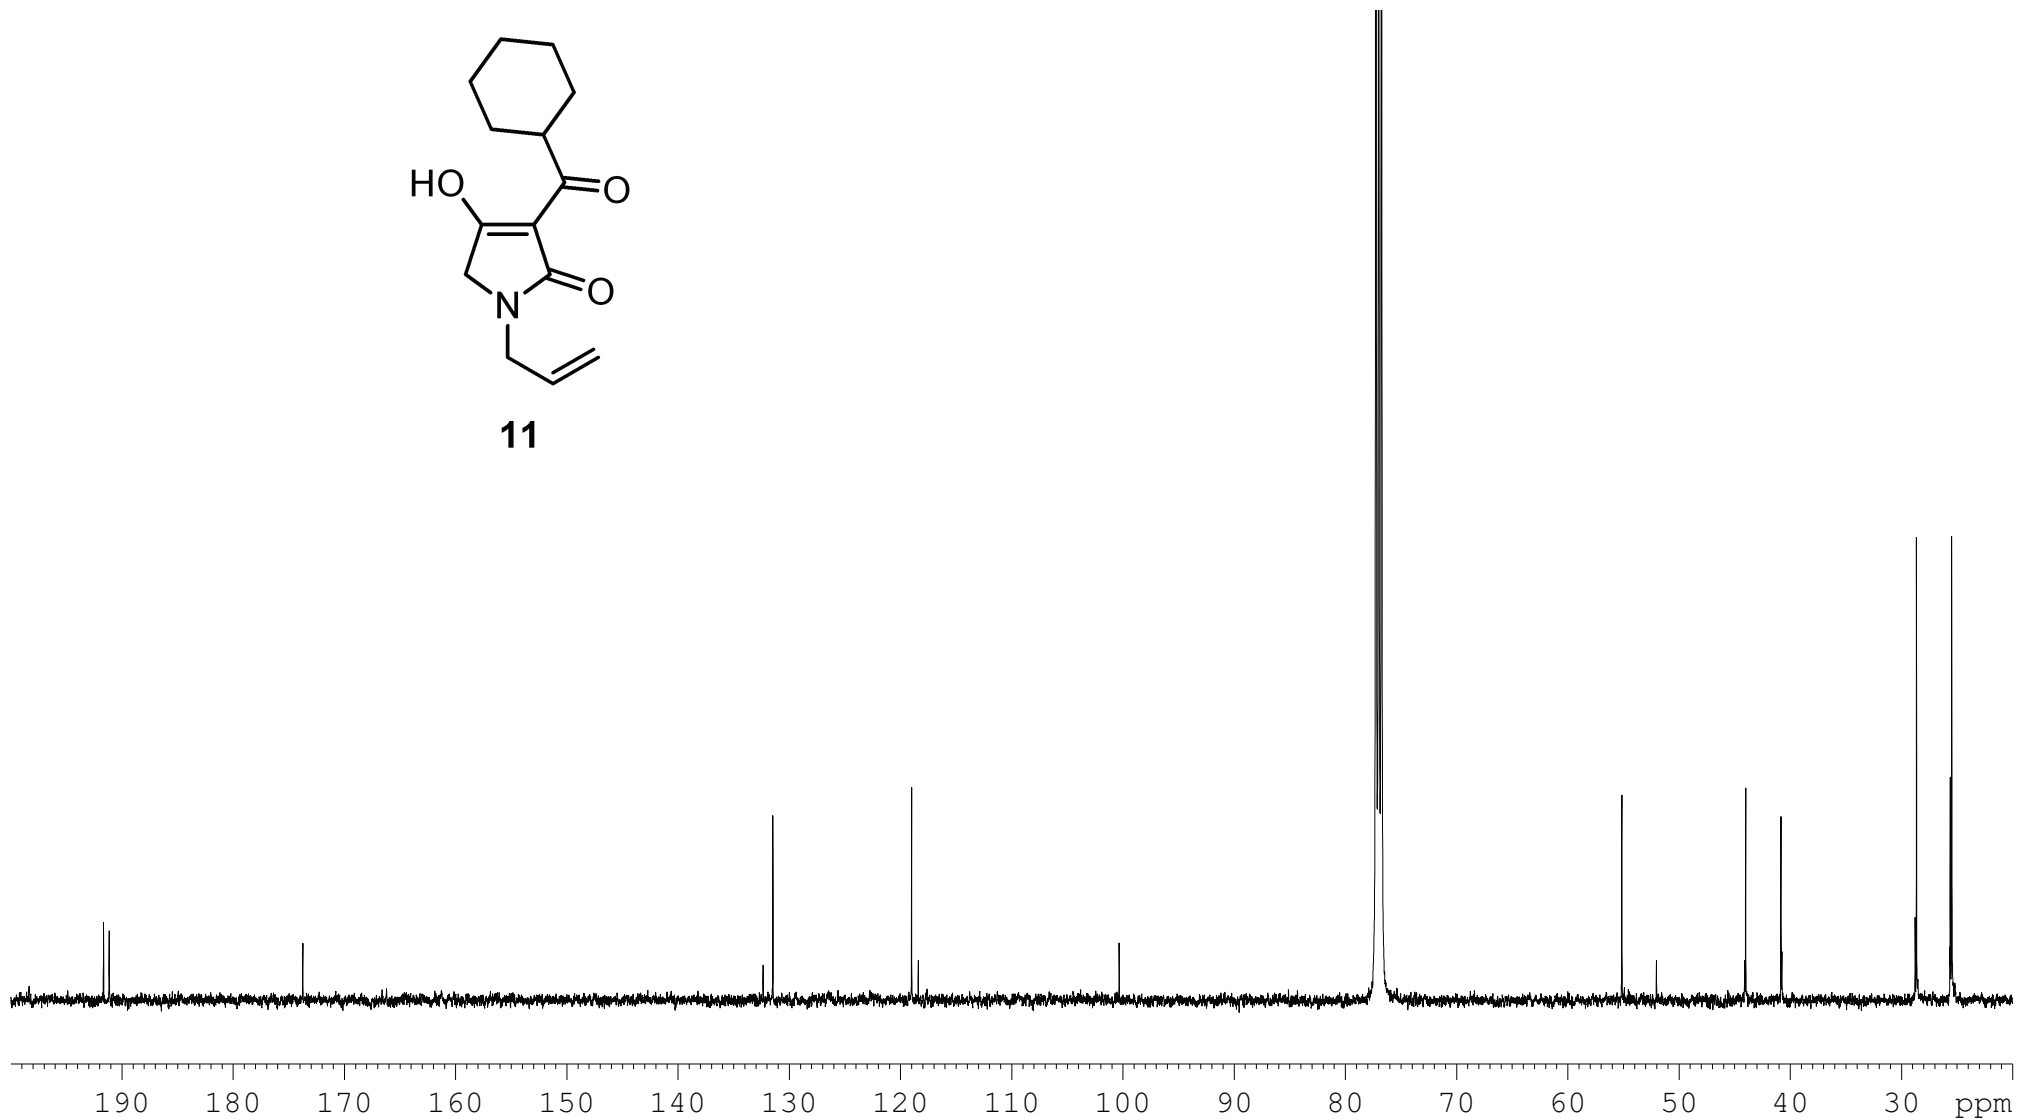

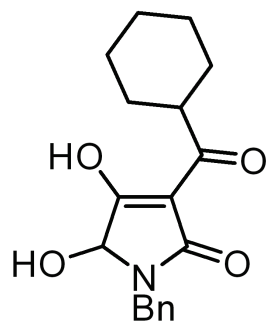

**12**

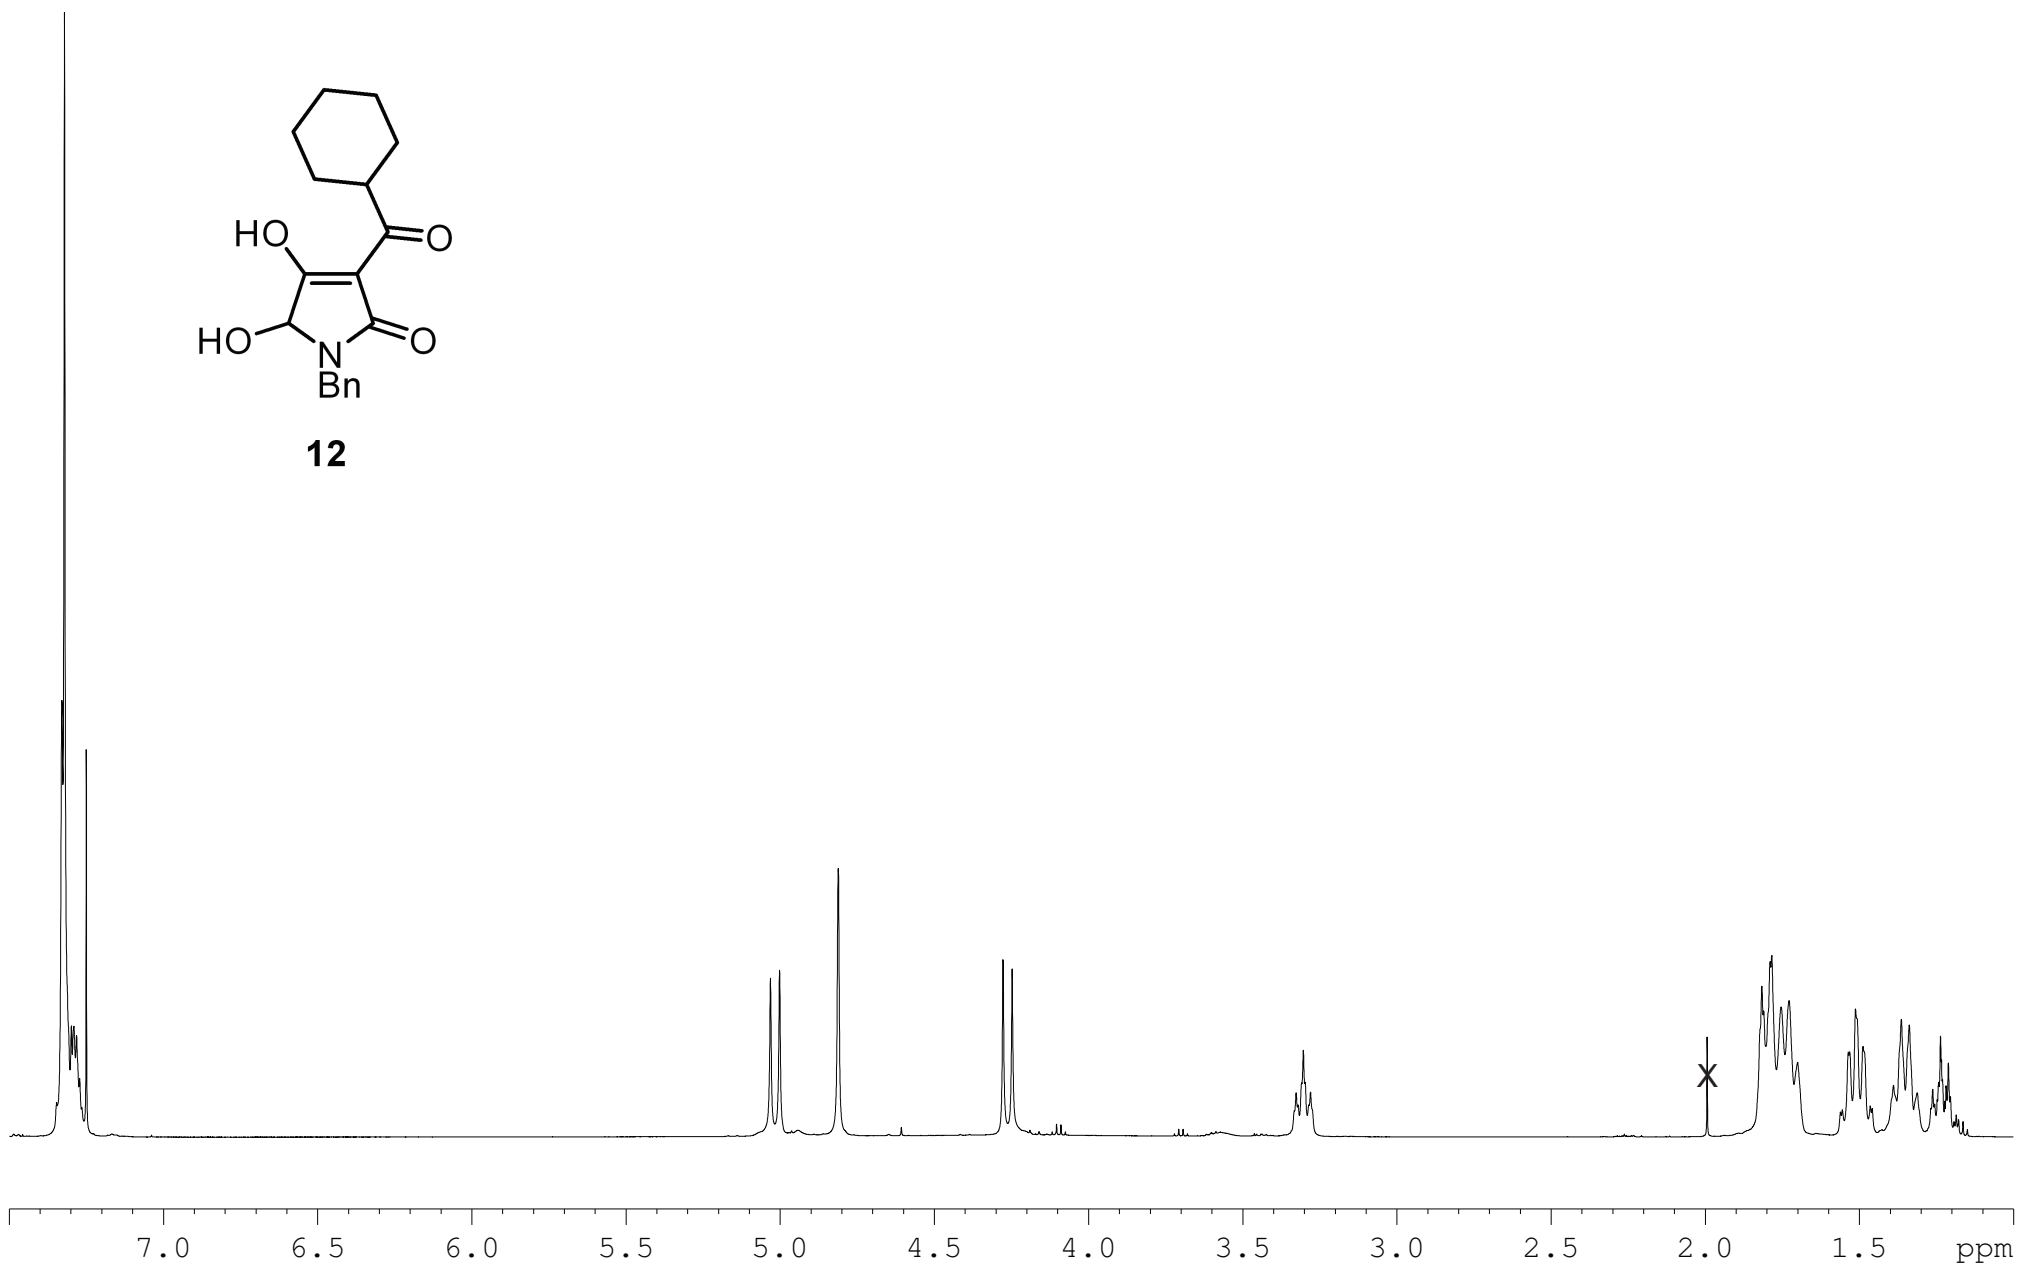



192.78  
192.58

173.08

135.54  
128.89  
128.65  
128.02

98.06

80.97

42.56  
41.17

28.78  
28.55  
25.56  
25.49

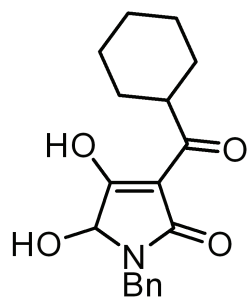

12

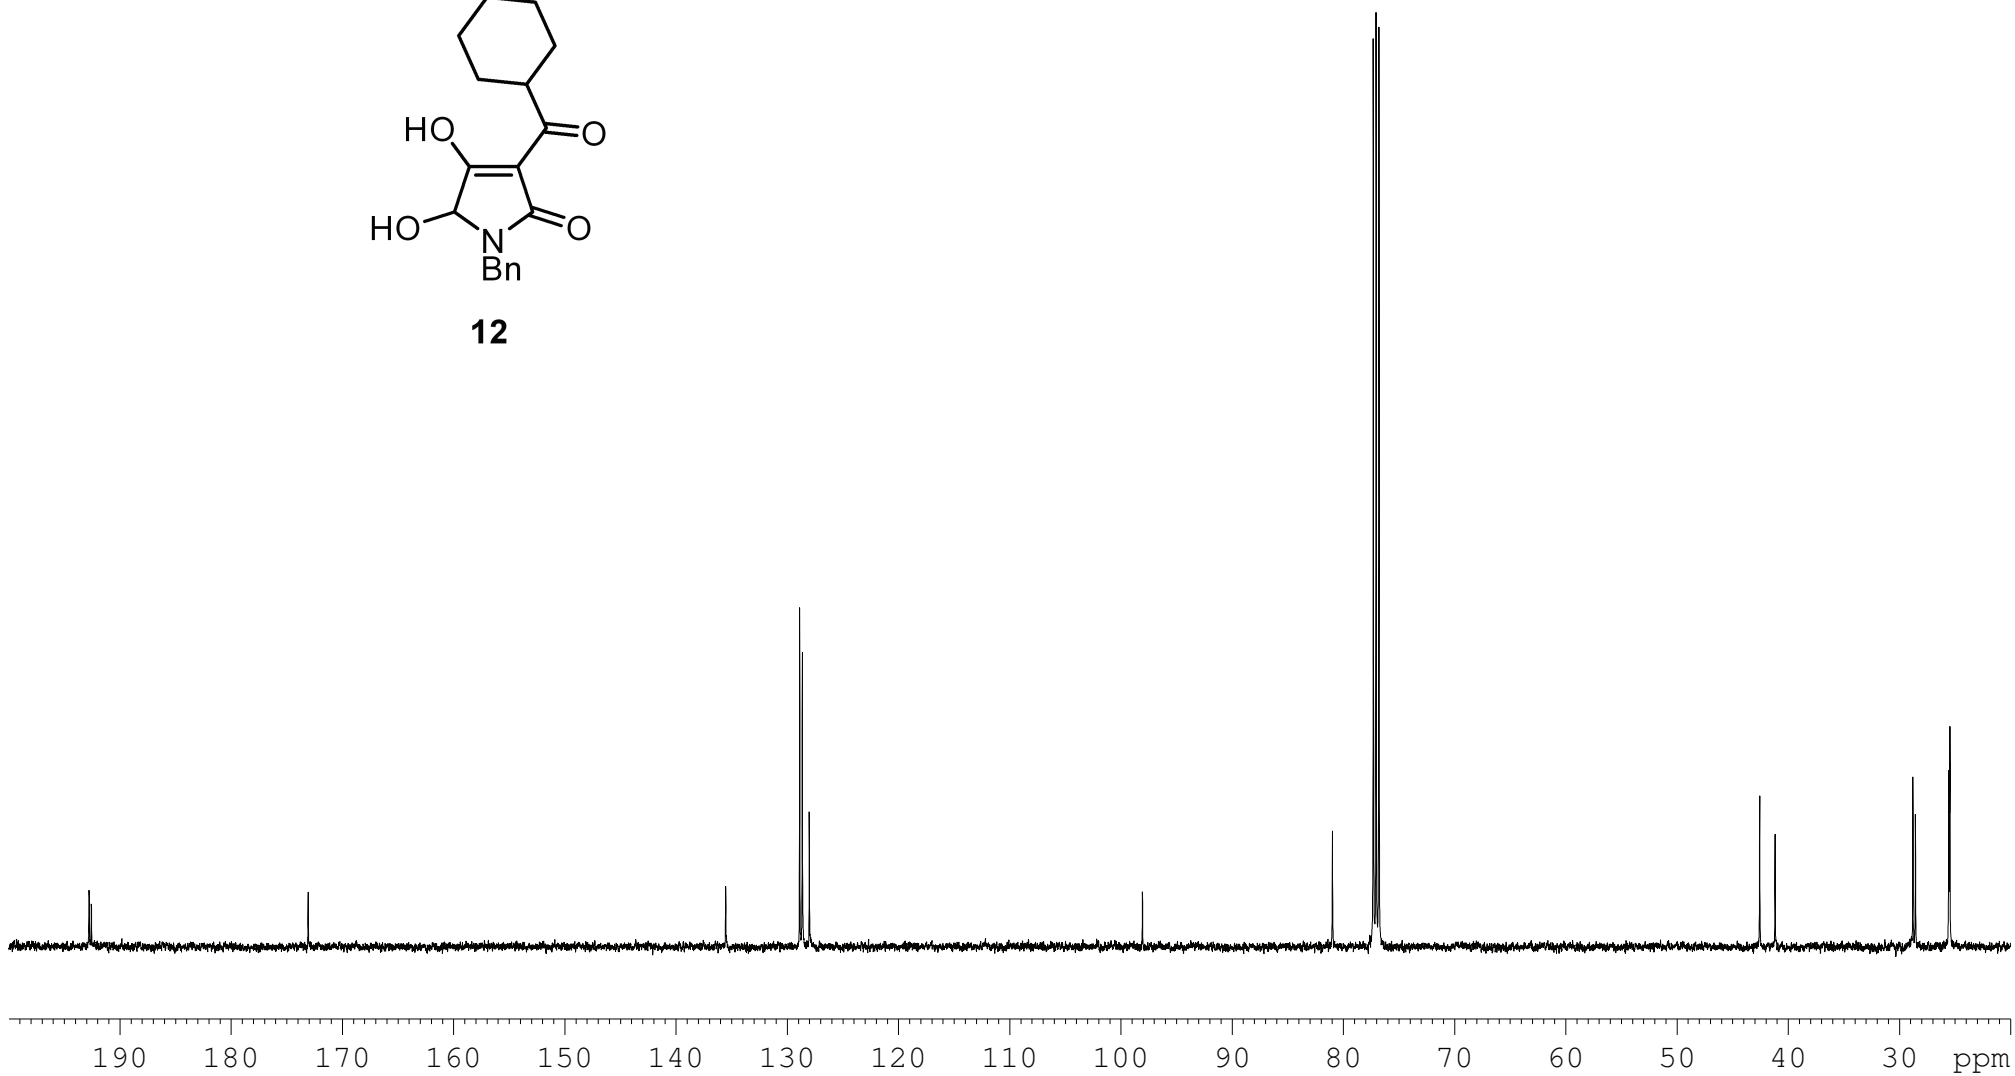

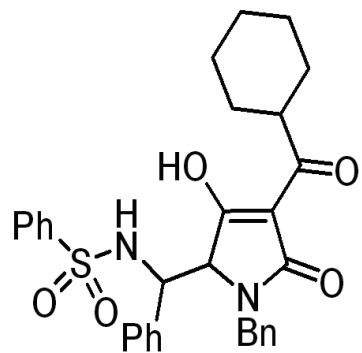

15

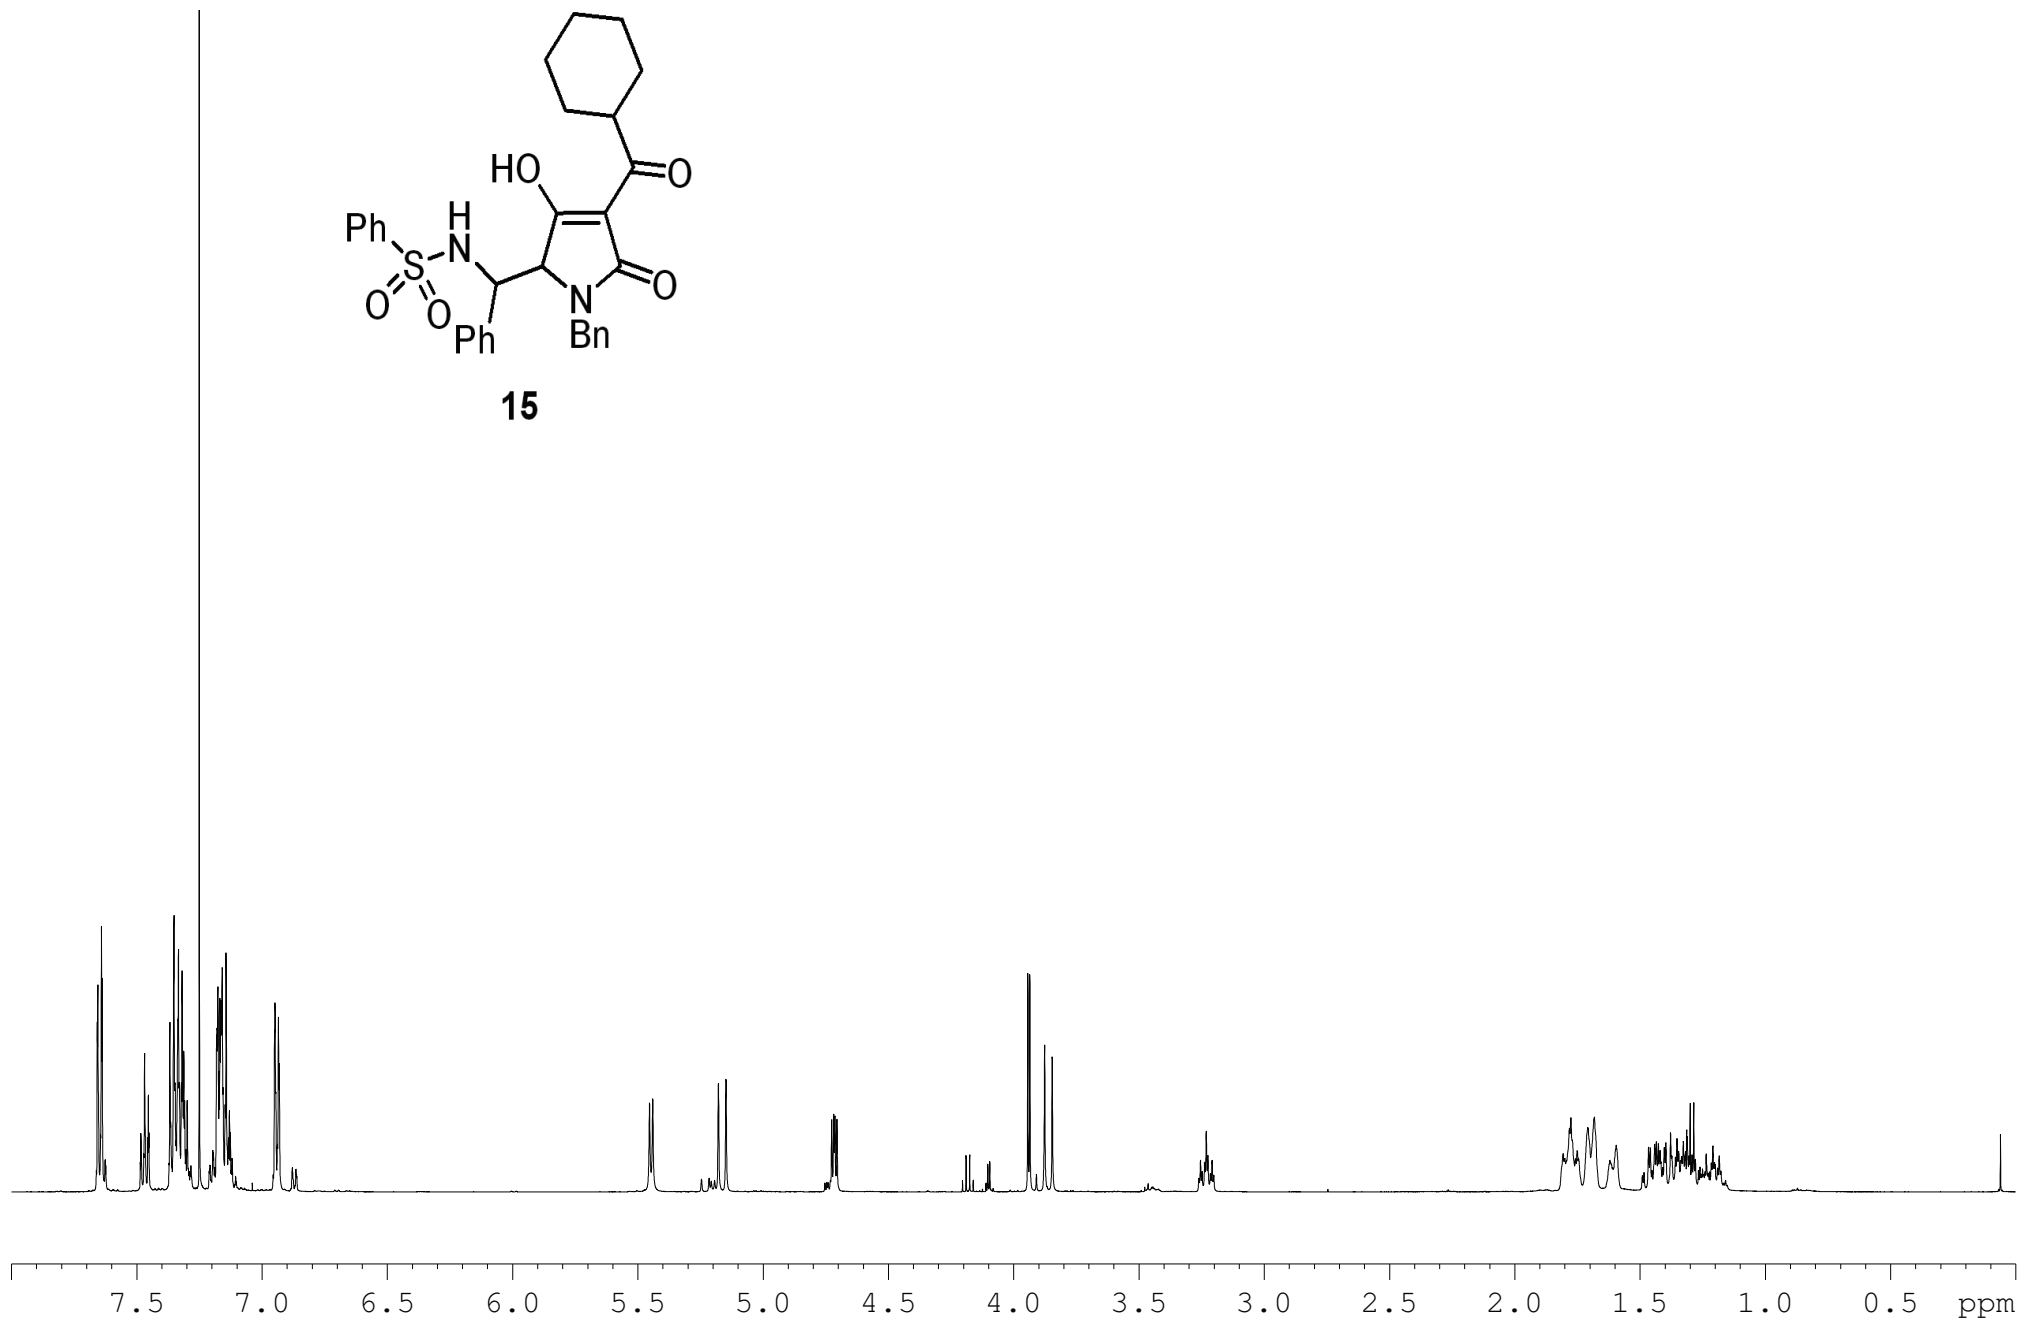

193.20  
191.59

174.62

139.68  
135.78  
135.08  
132.76  
129.05  
128.96  
128.59  
128.35  
128.24  
127.41  
127.02

99.58

66.68

57.96

44.23  
41.02

28.61  
28.51  
25.55  
25.49

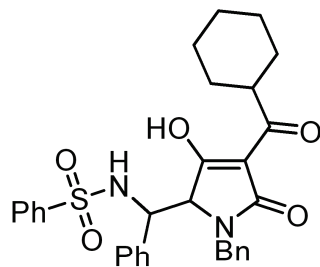

15

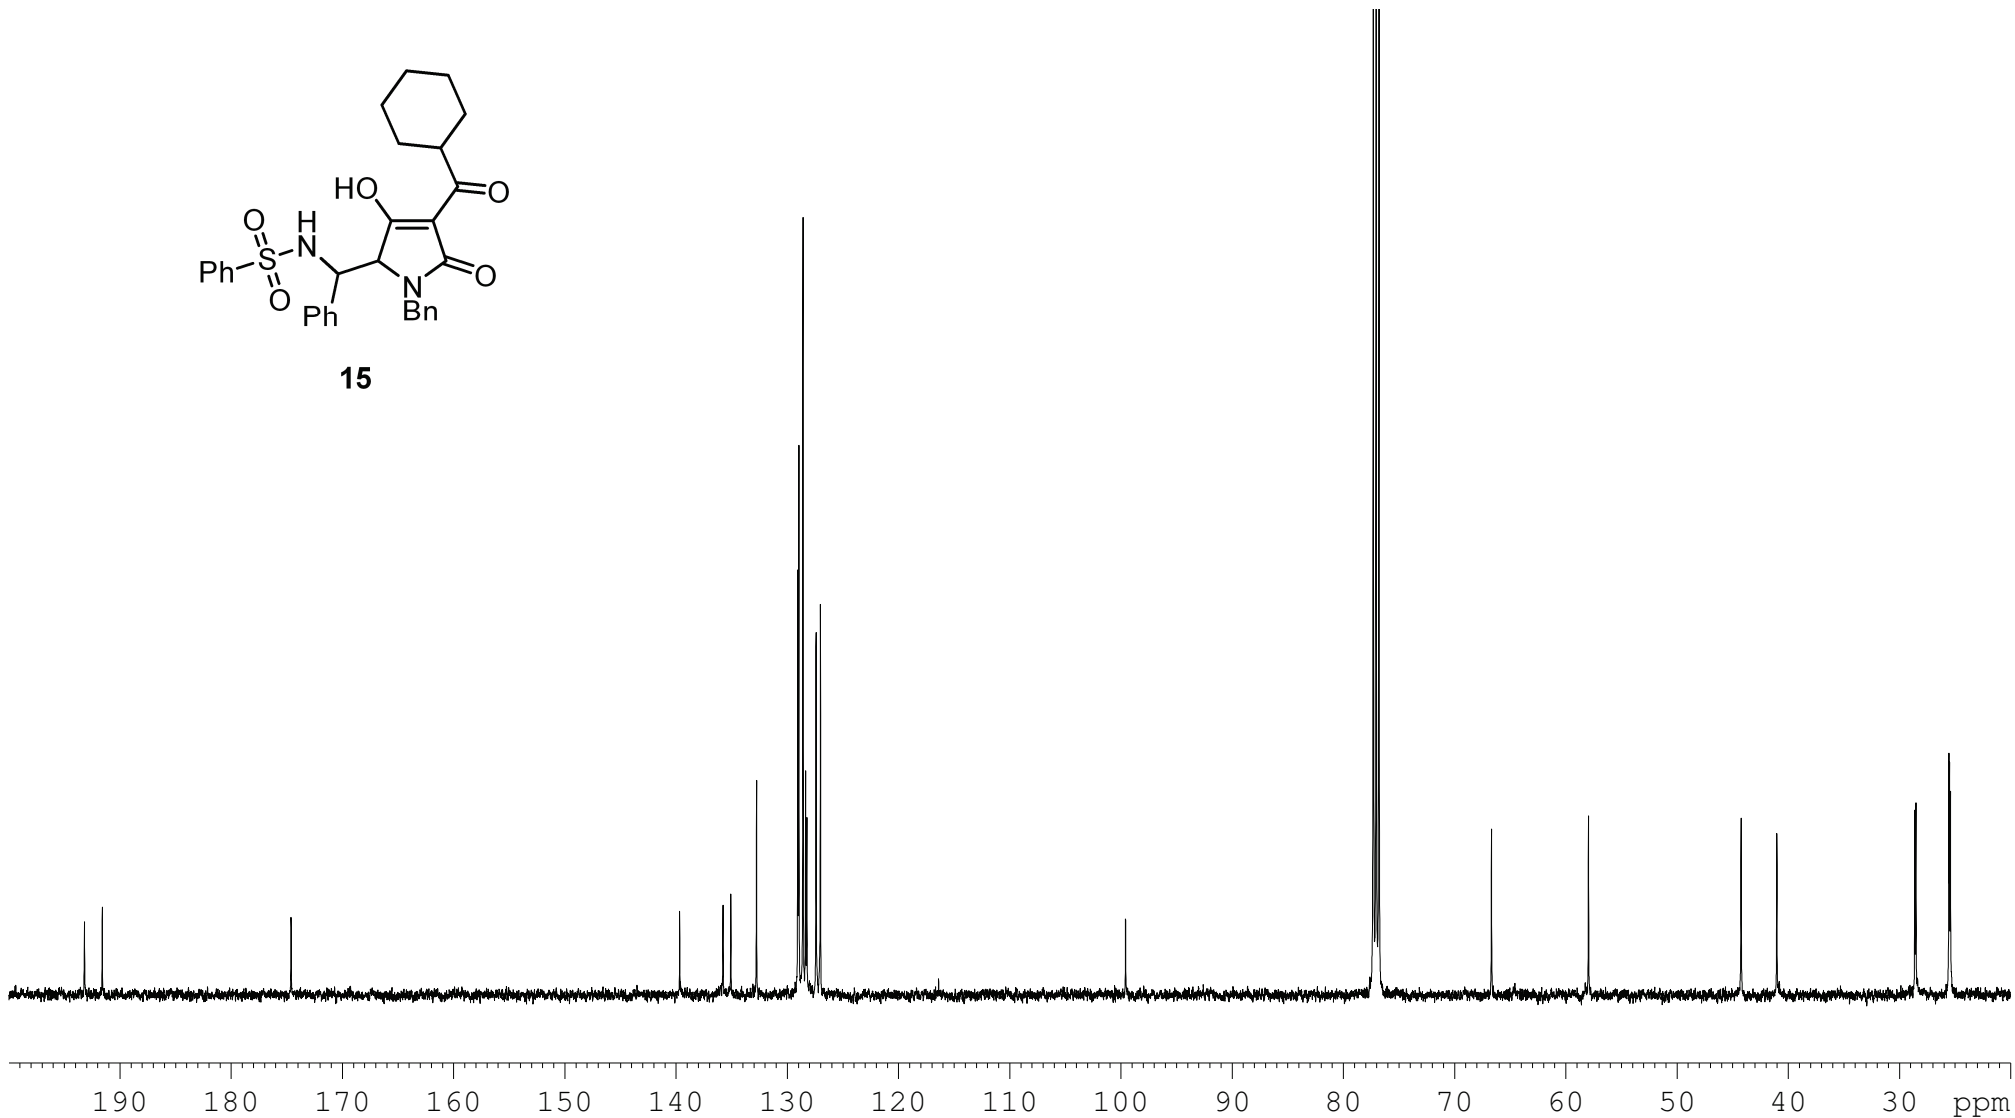

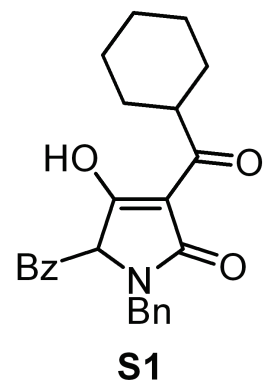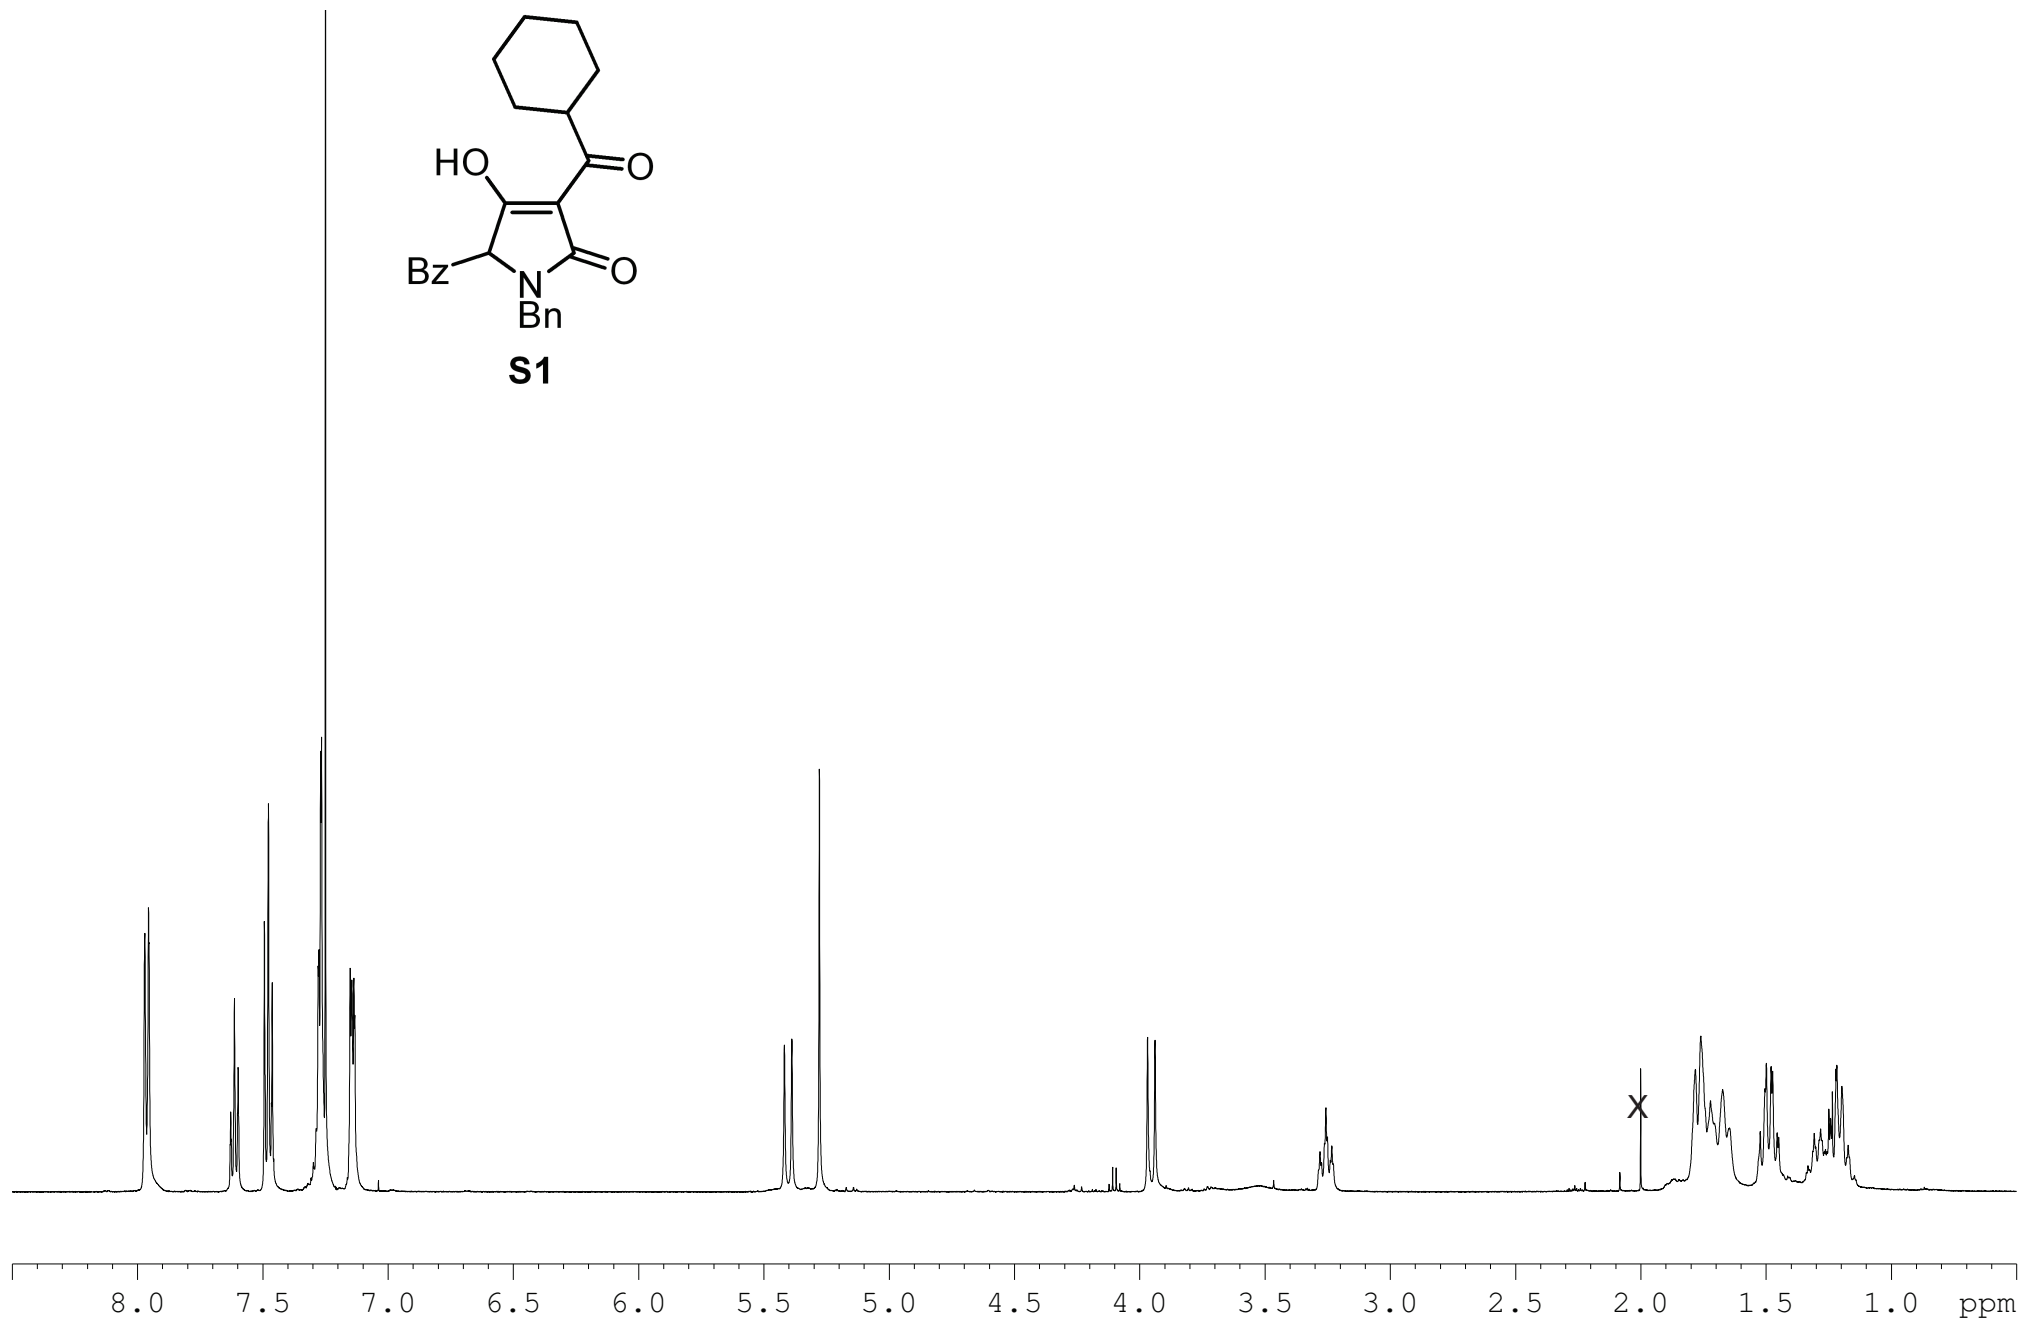

— 193.56  
— 189.98  
— 185.71

— 174.25

135.03  
134.89  
134.29  
129.93  
129.05  
128.73  
128.69  
128.21

— 98.63

— 69.93

— 44.12  
— 41.14

28.96  
28.31  
25.57  
25.38

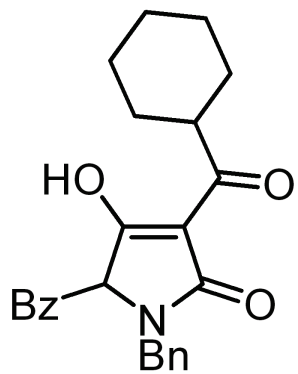

**S1**

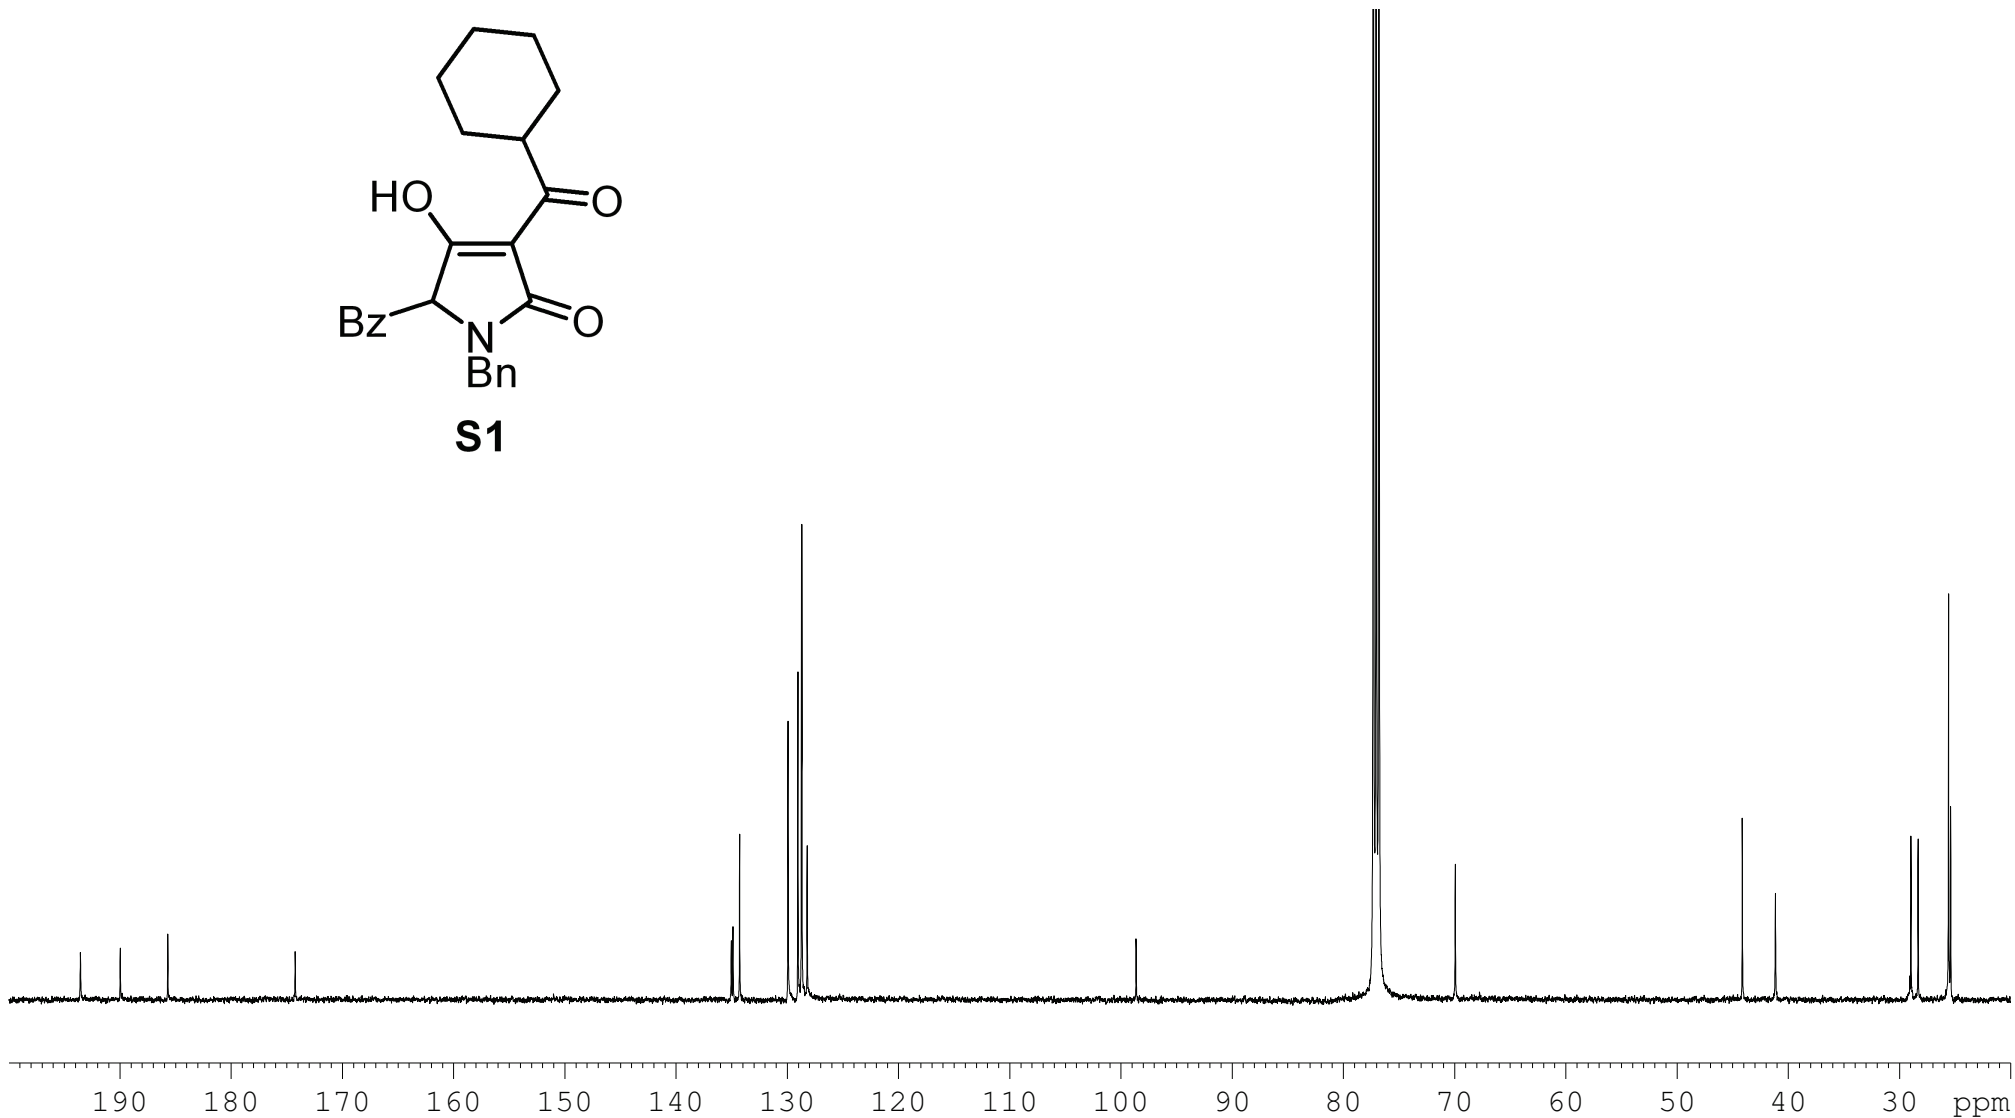

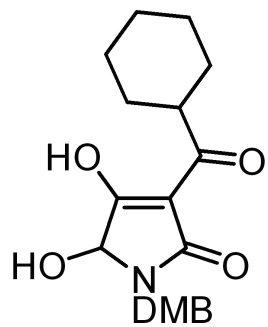

**16**

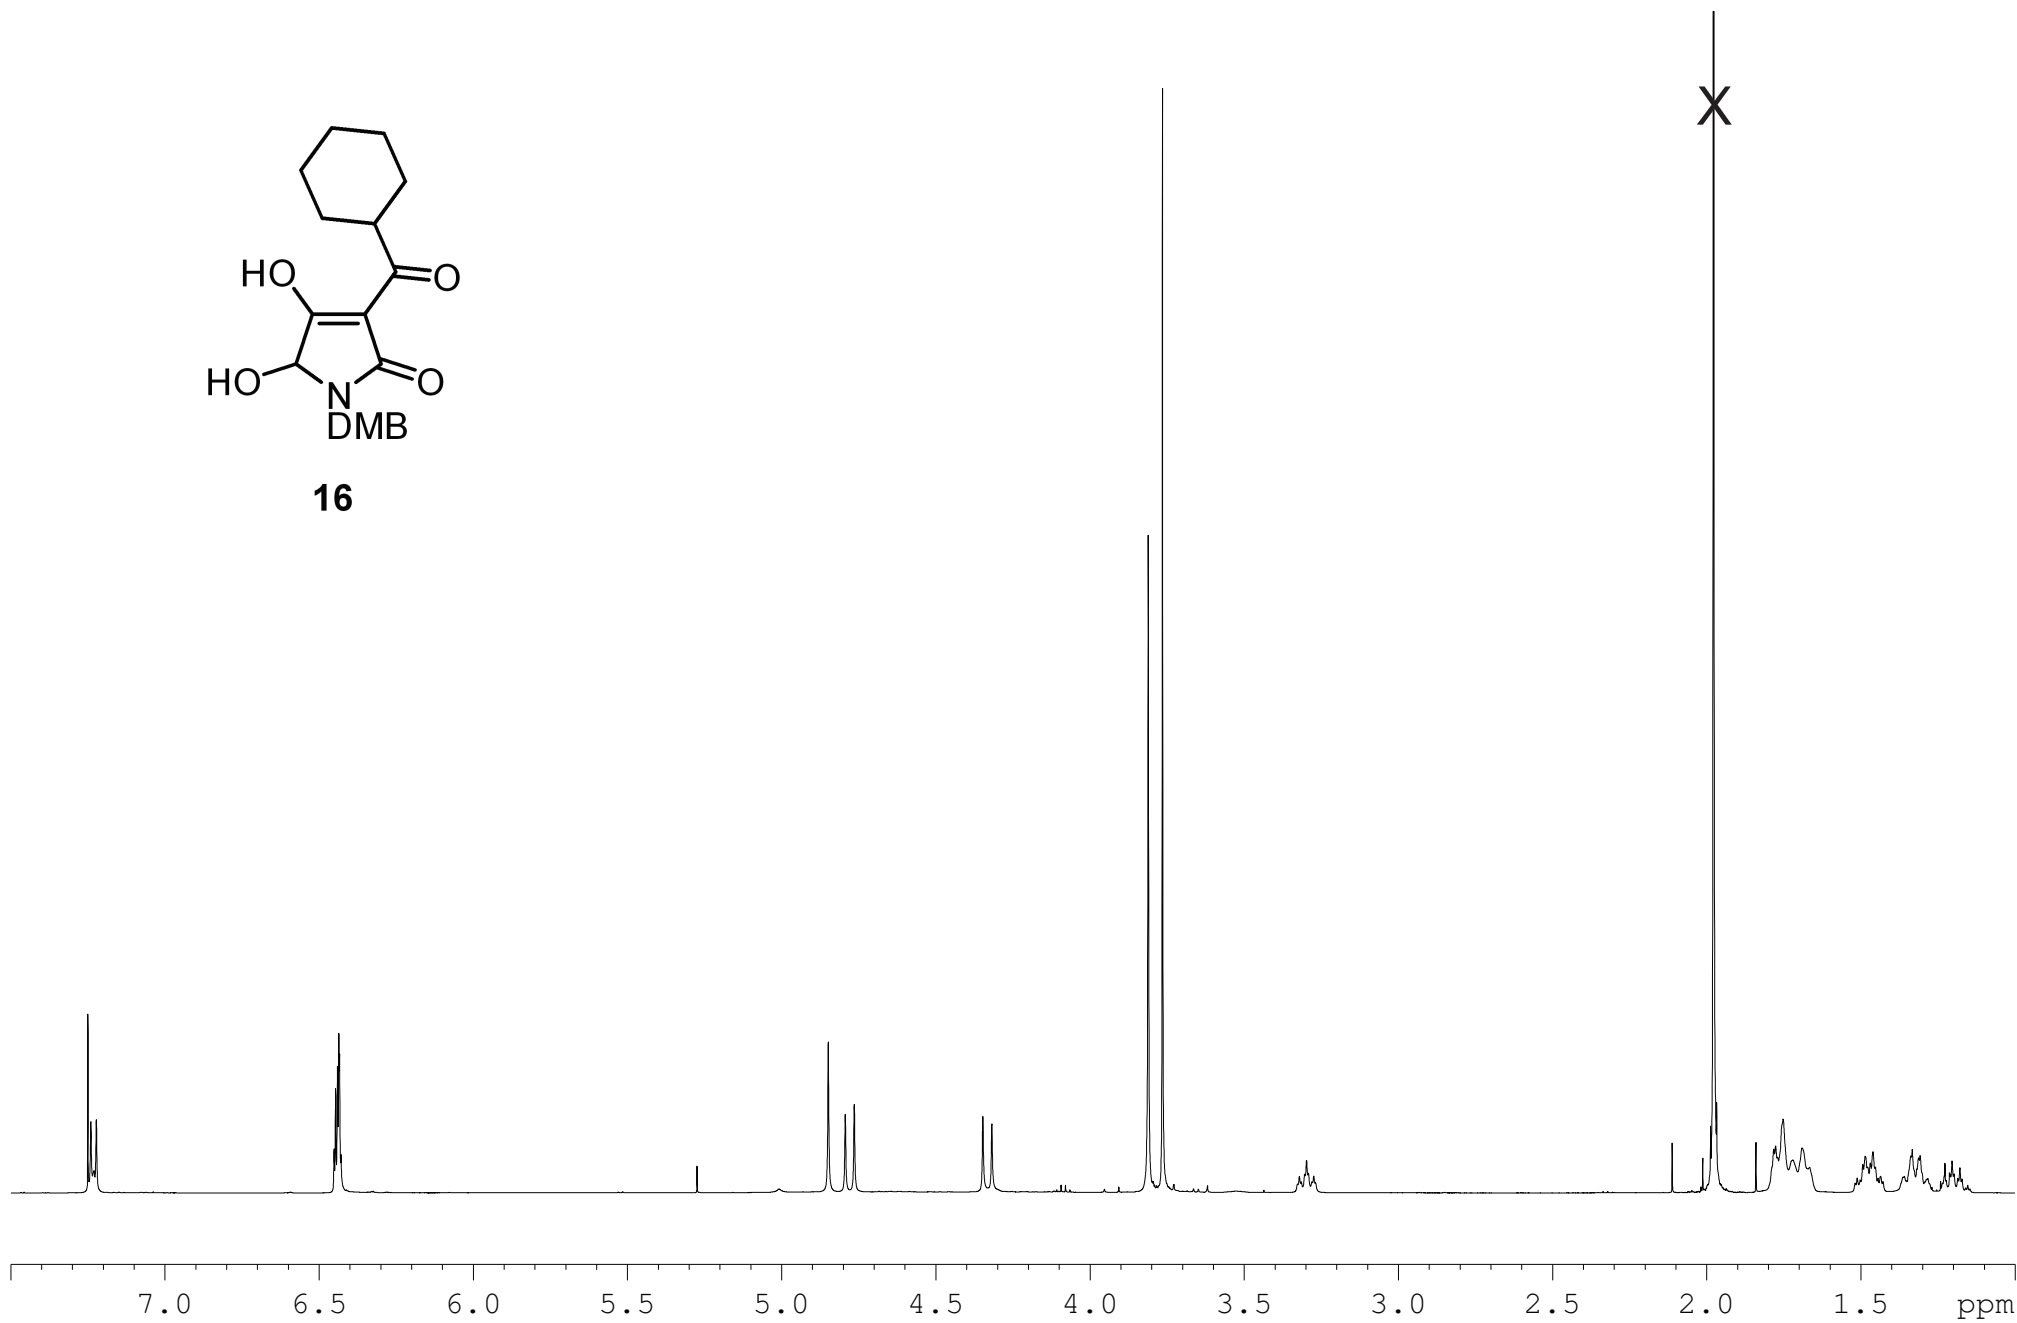

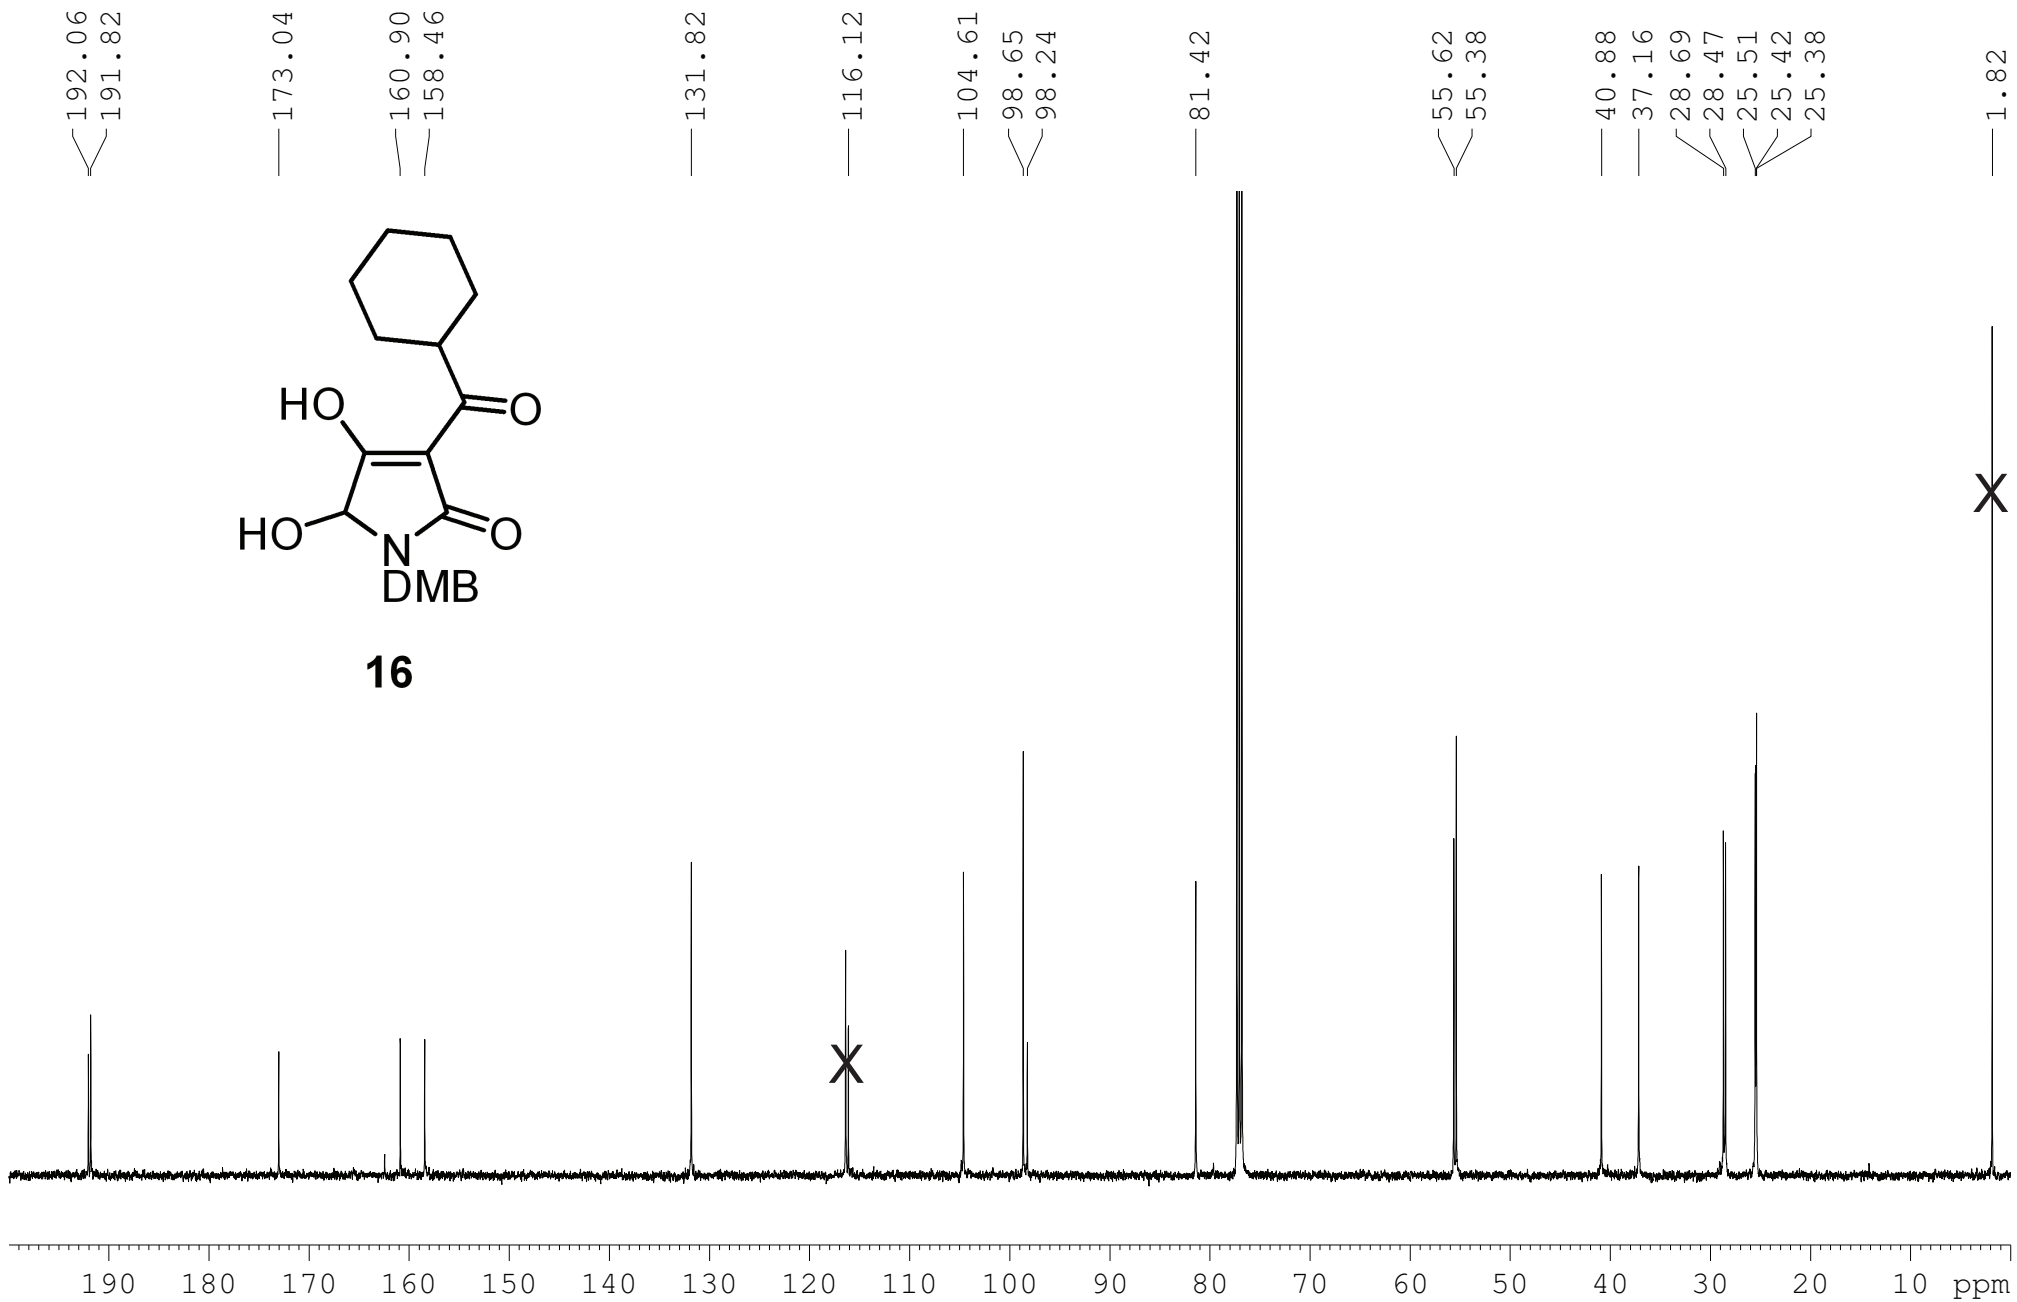

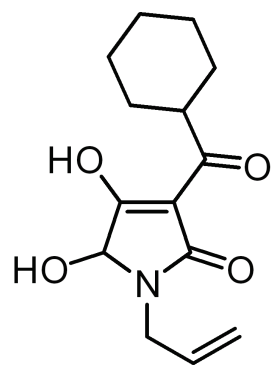

17

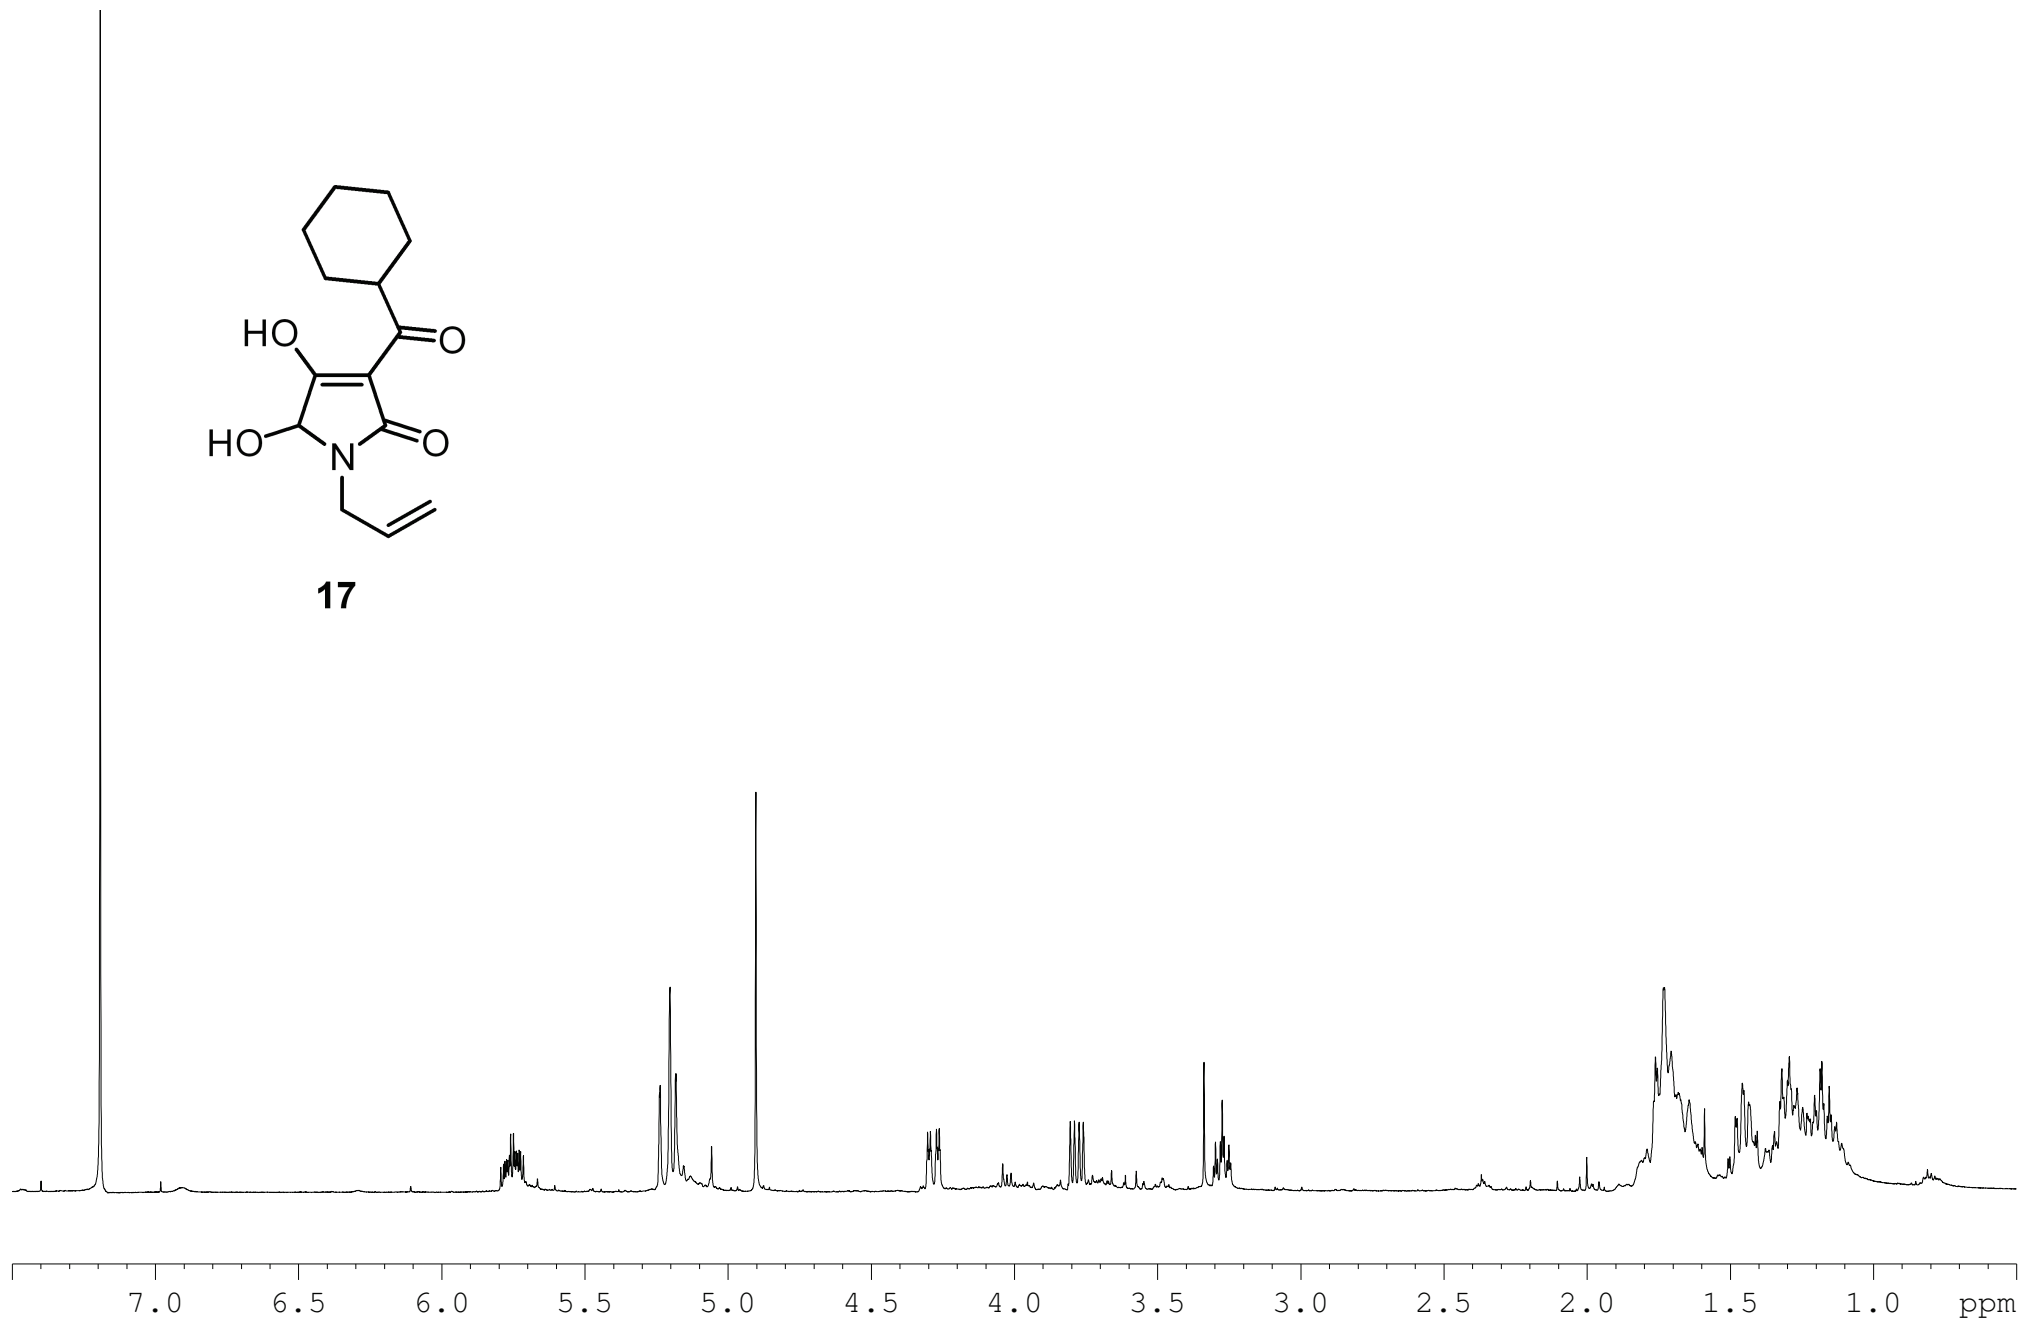



< 192.44  
< 191.76

— 173.18

— 131.56

— 118.97

— 97.91

— 81.39

< 41.51  
< 41.04

< 28.72  
< 28.57  
< 25.52  
< 25.44

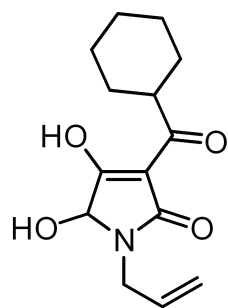

17

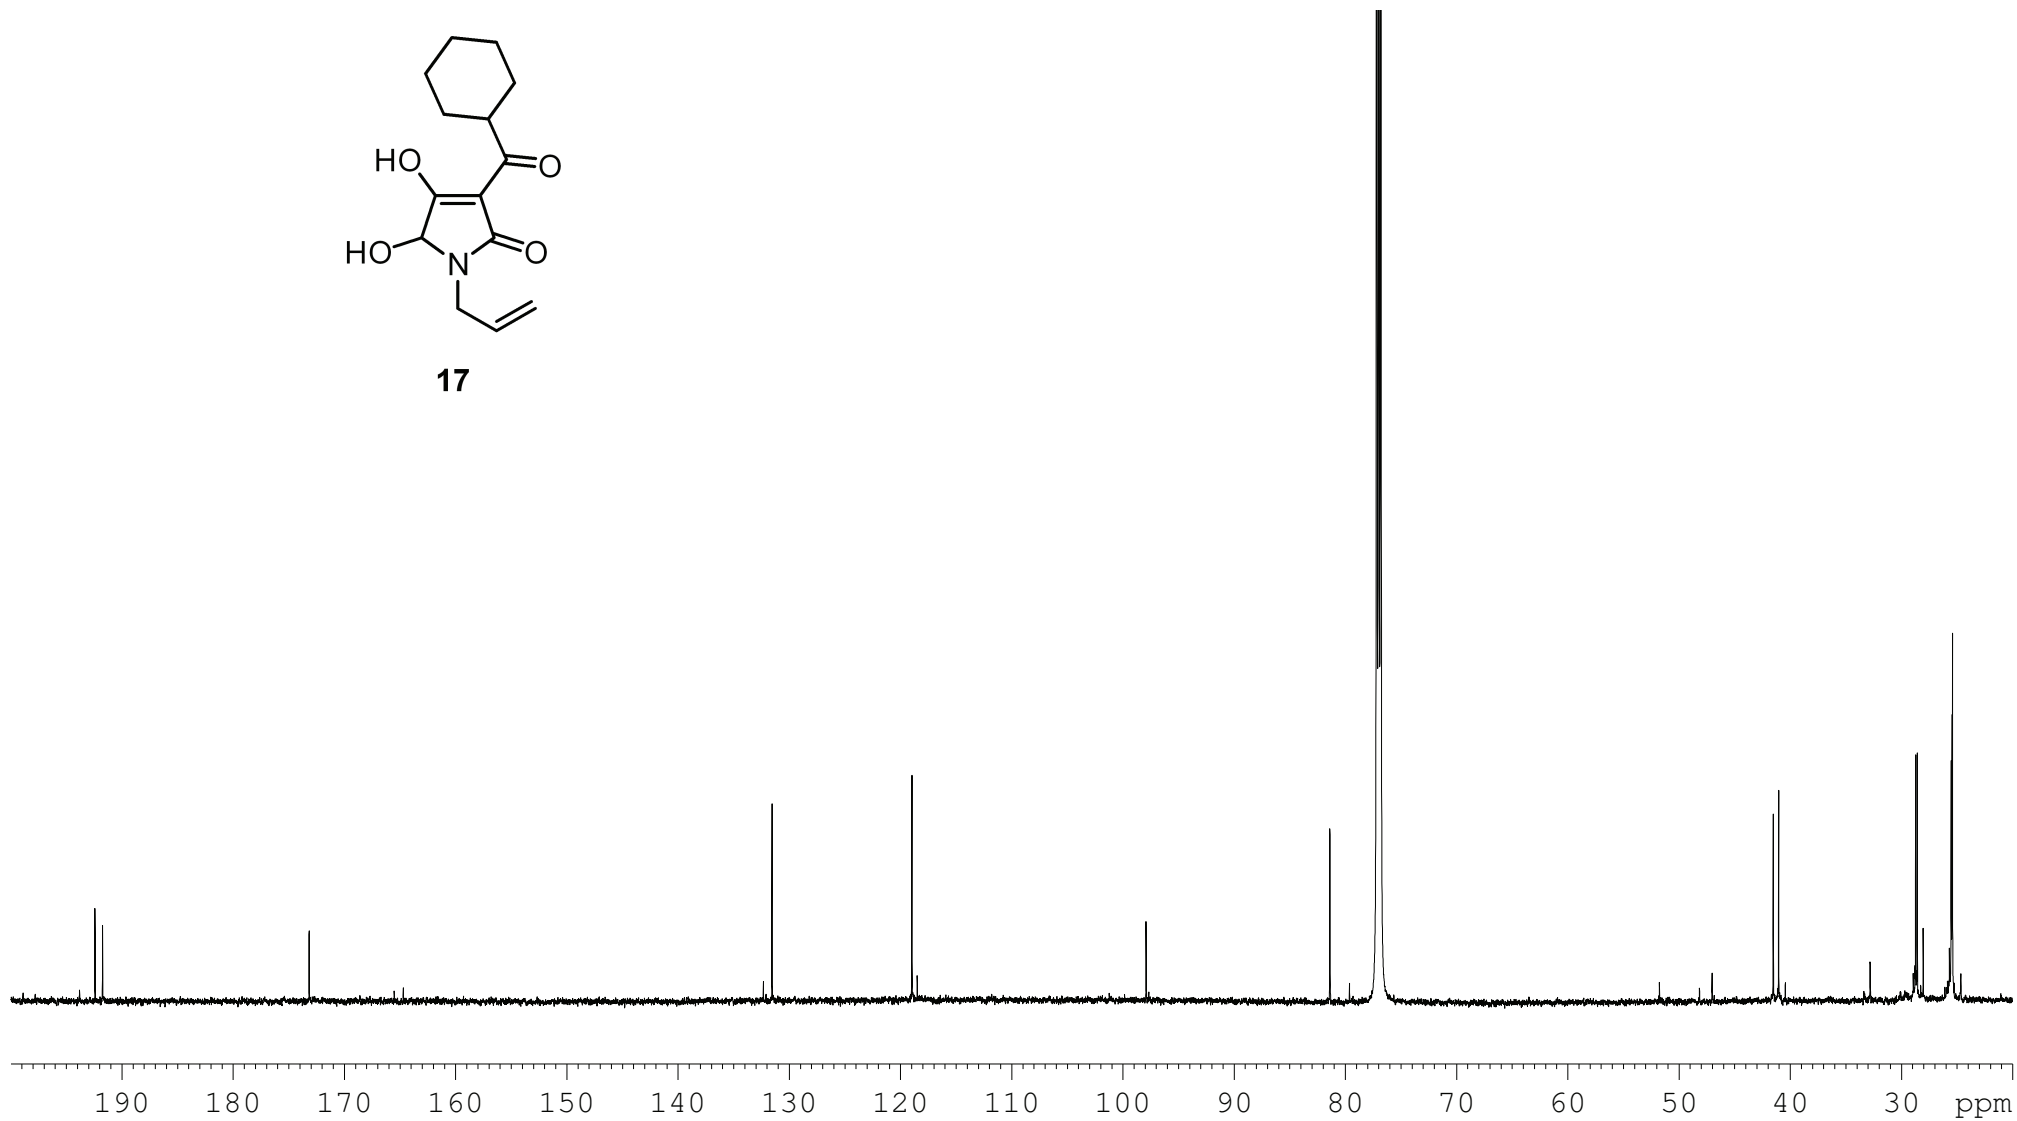

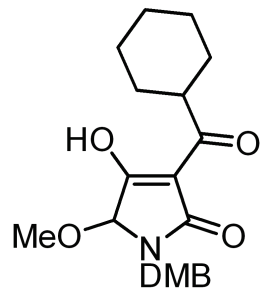

**18**

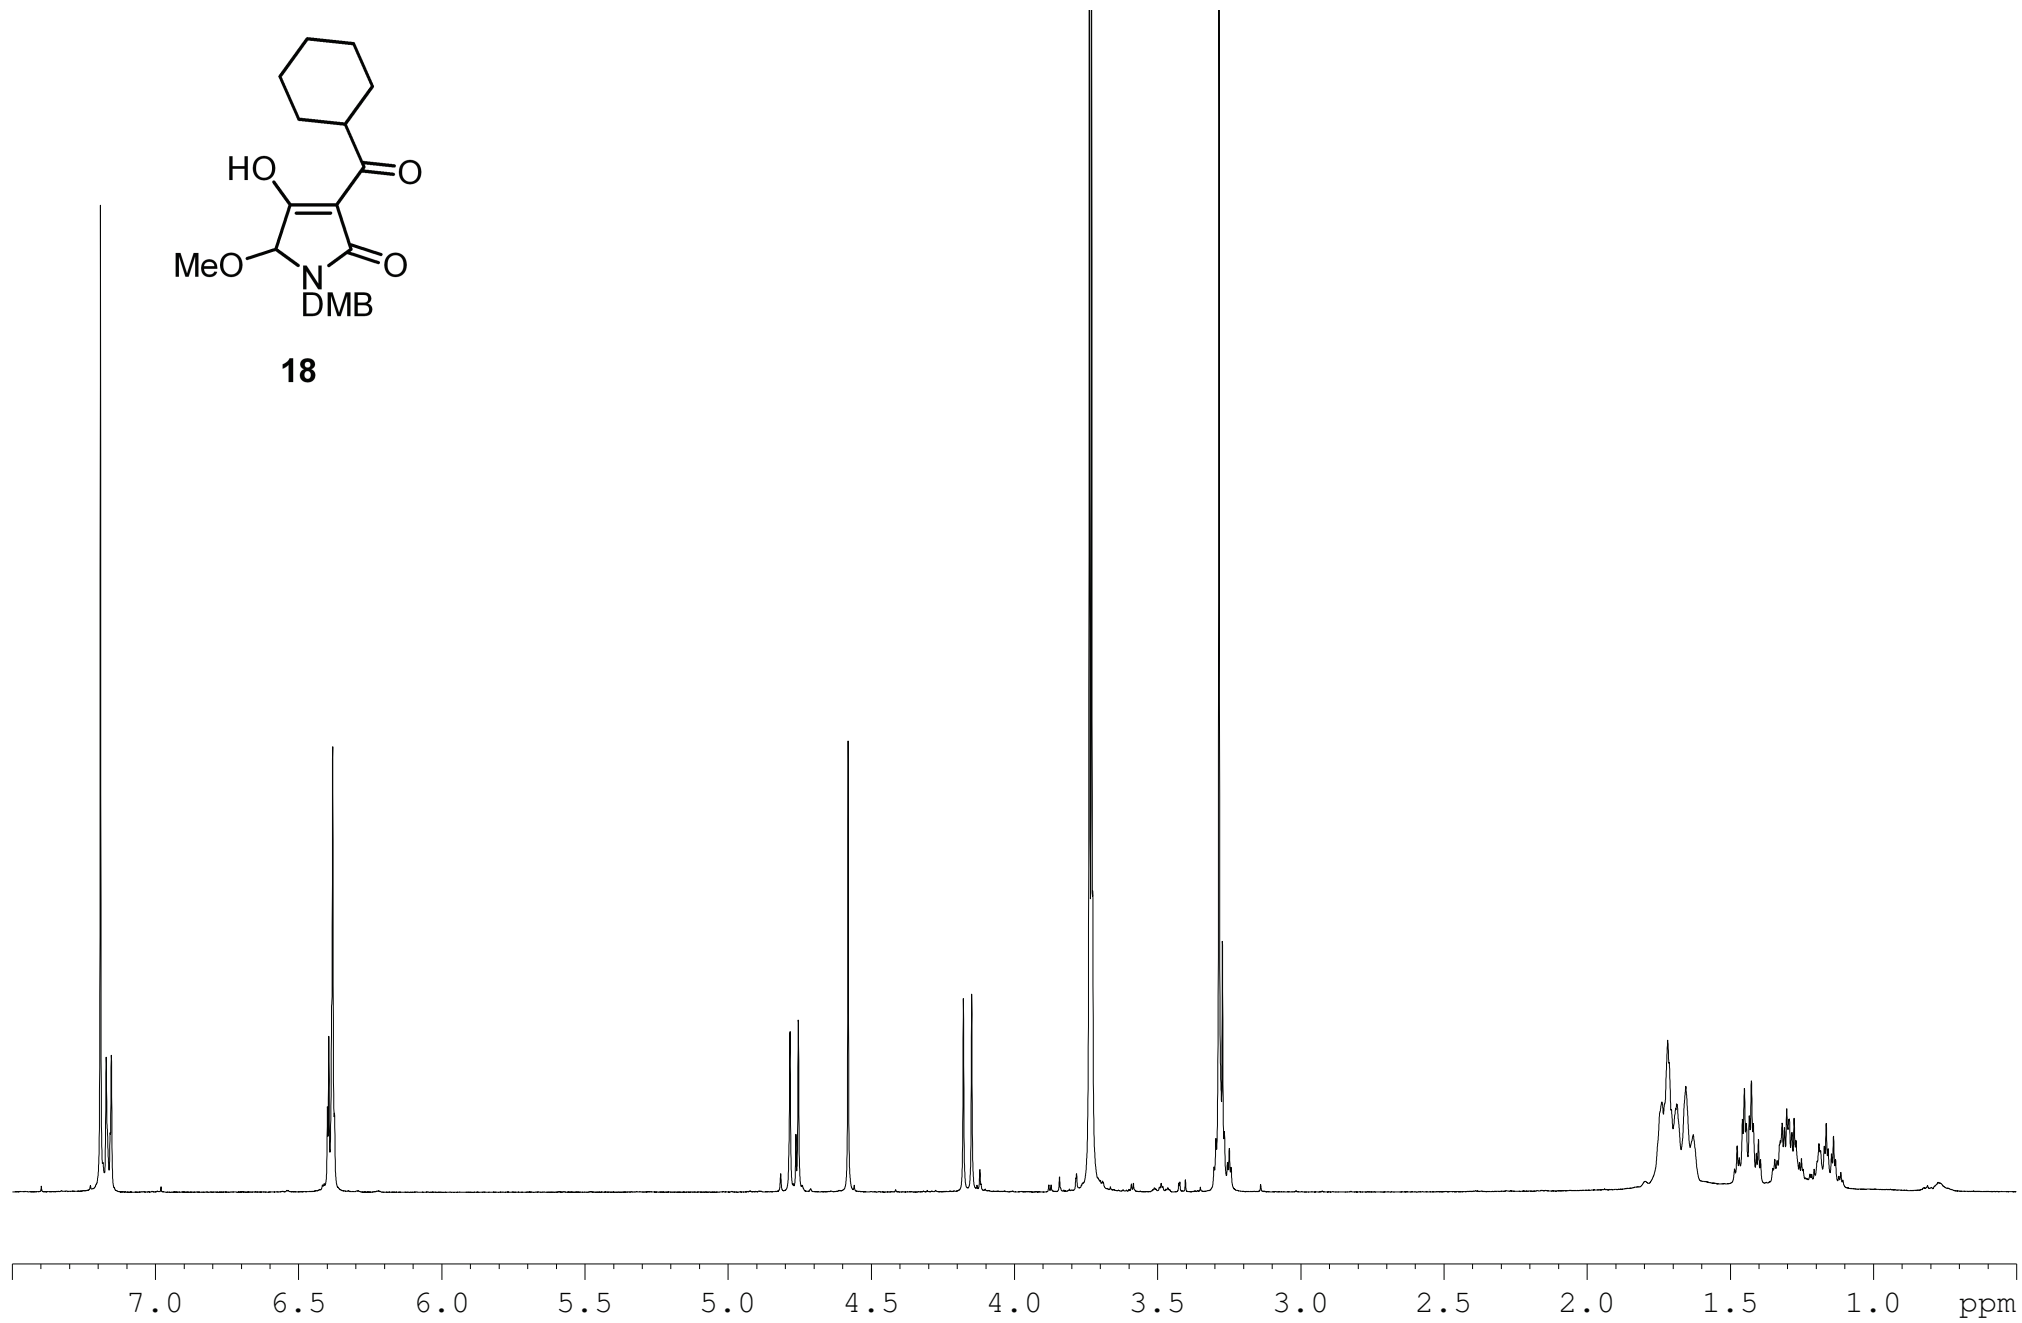

191.34  
191.26

173.69

160.92  
158.62

131.66

116.15

104.17  
99.02  
98.58

87.39

55.44  
55.41  
53.76

40.87  
37.57

28.81  
28.56  
25.58  
25.50

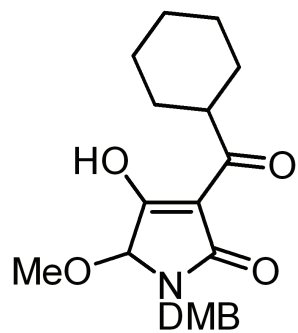

18

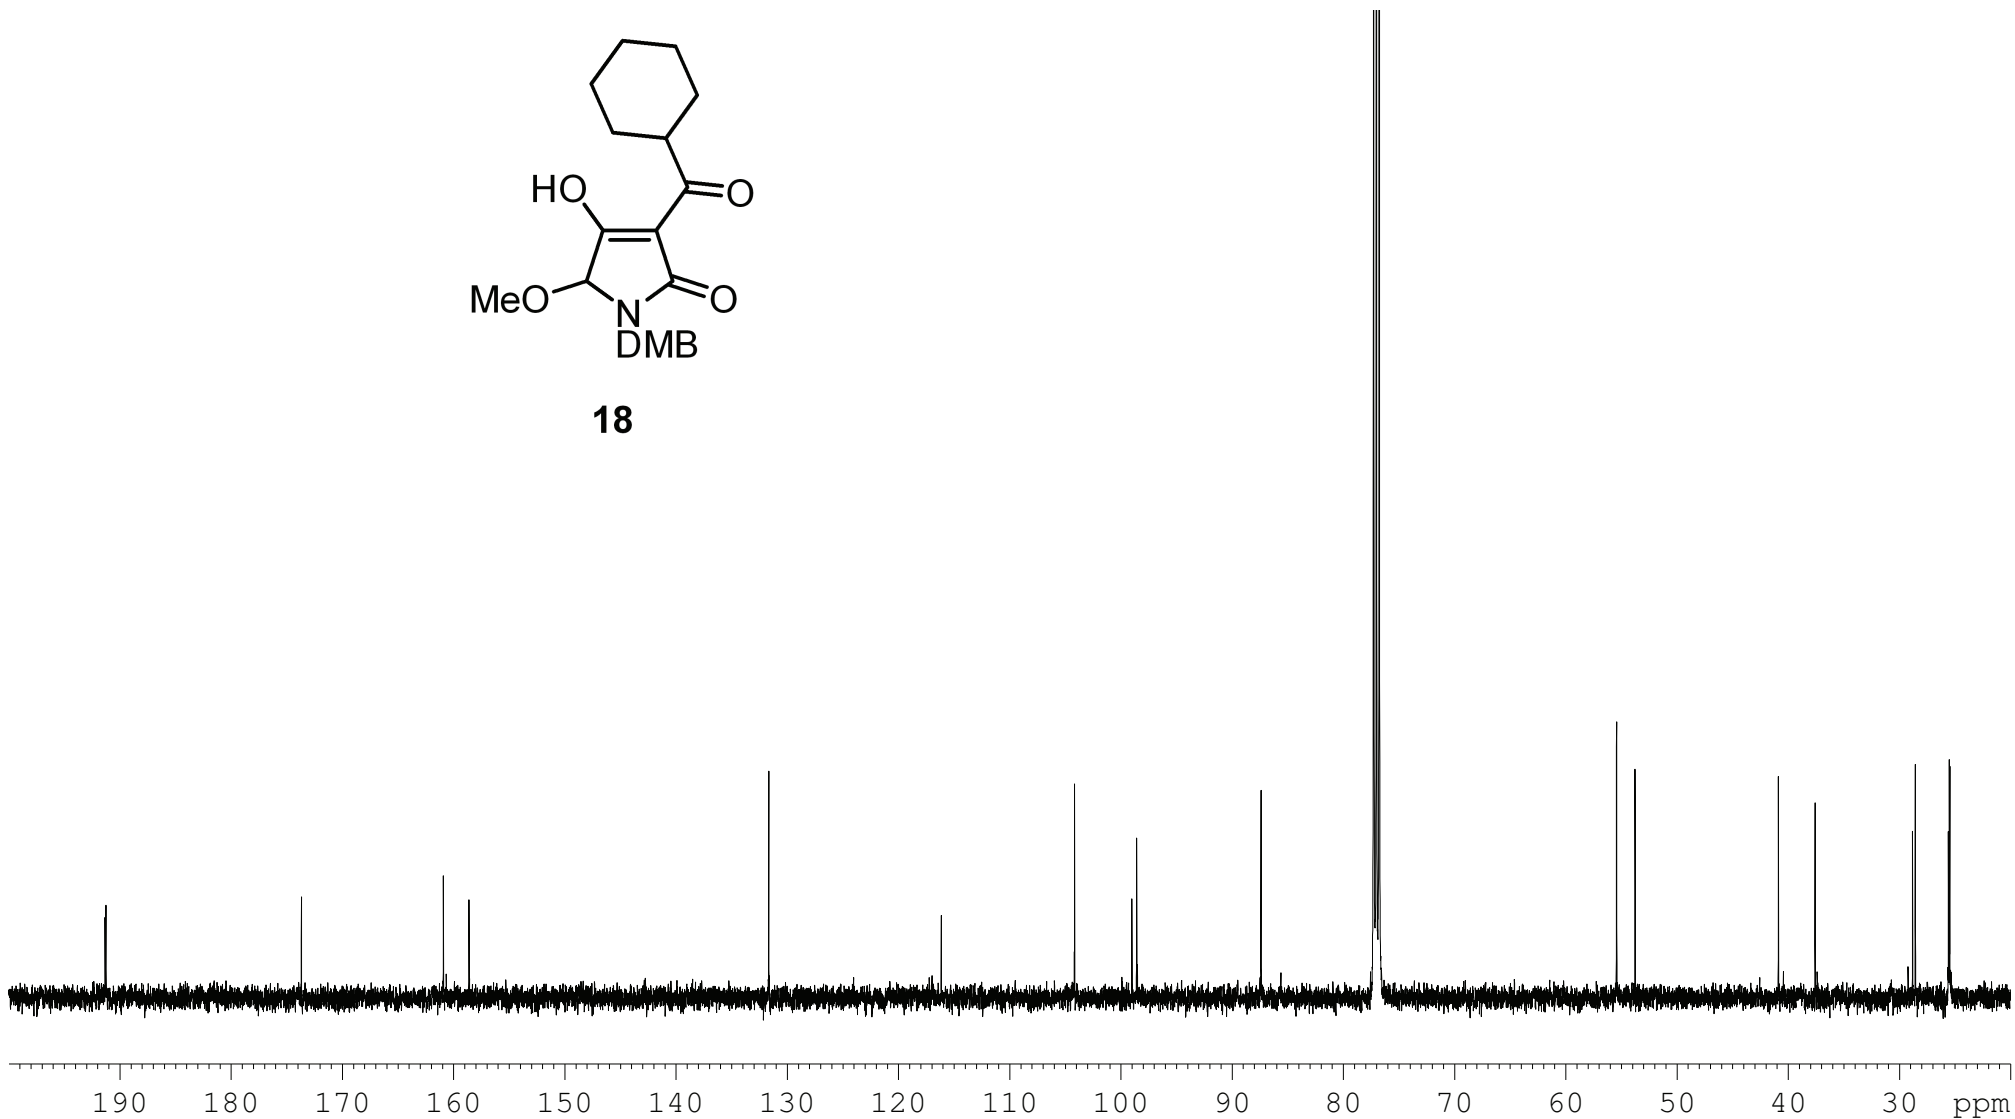

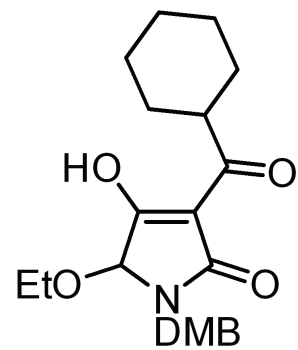

19

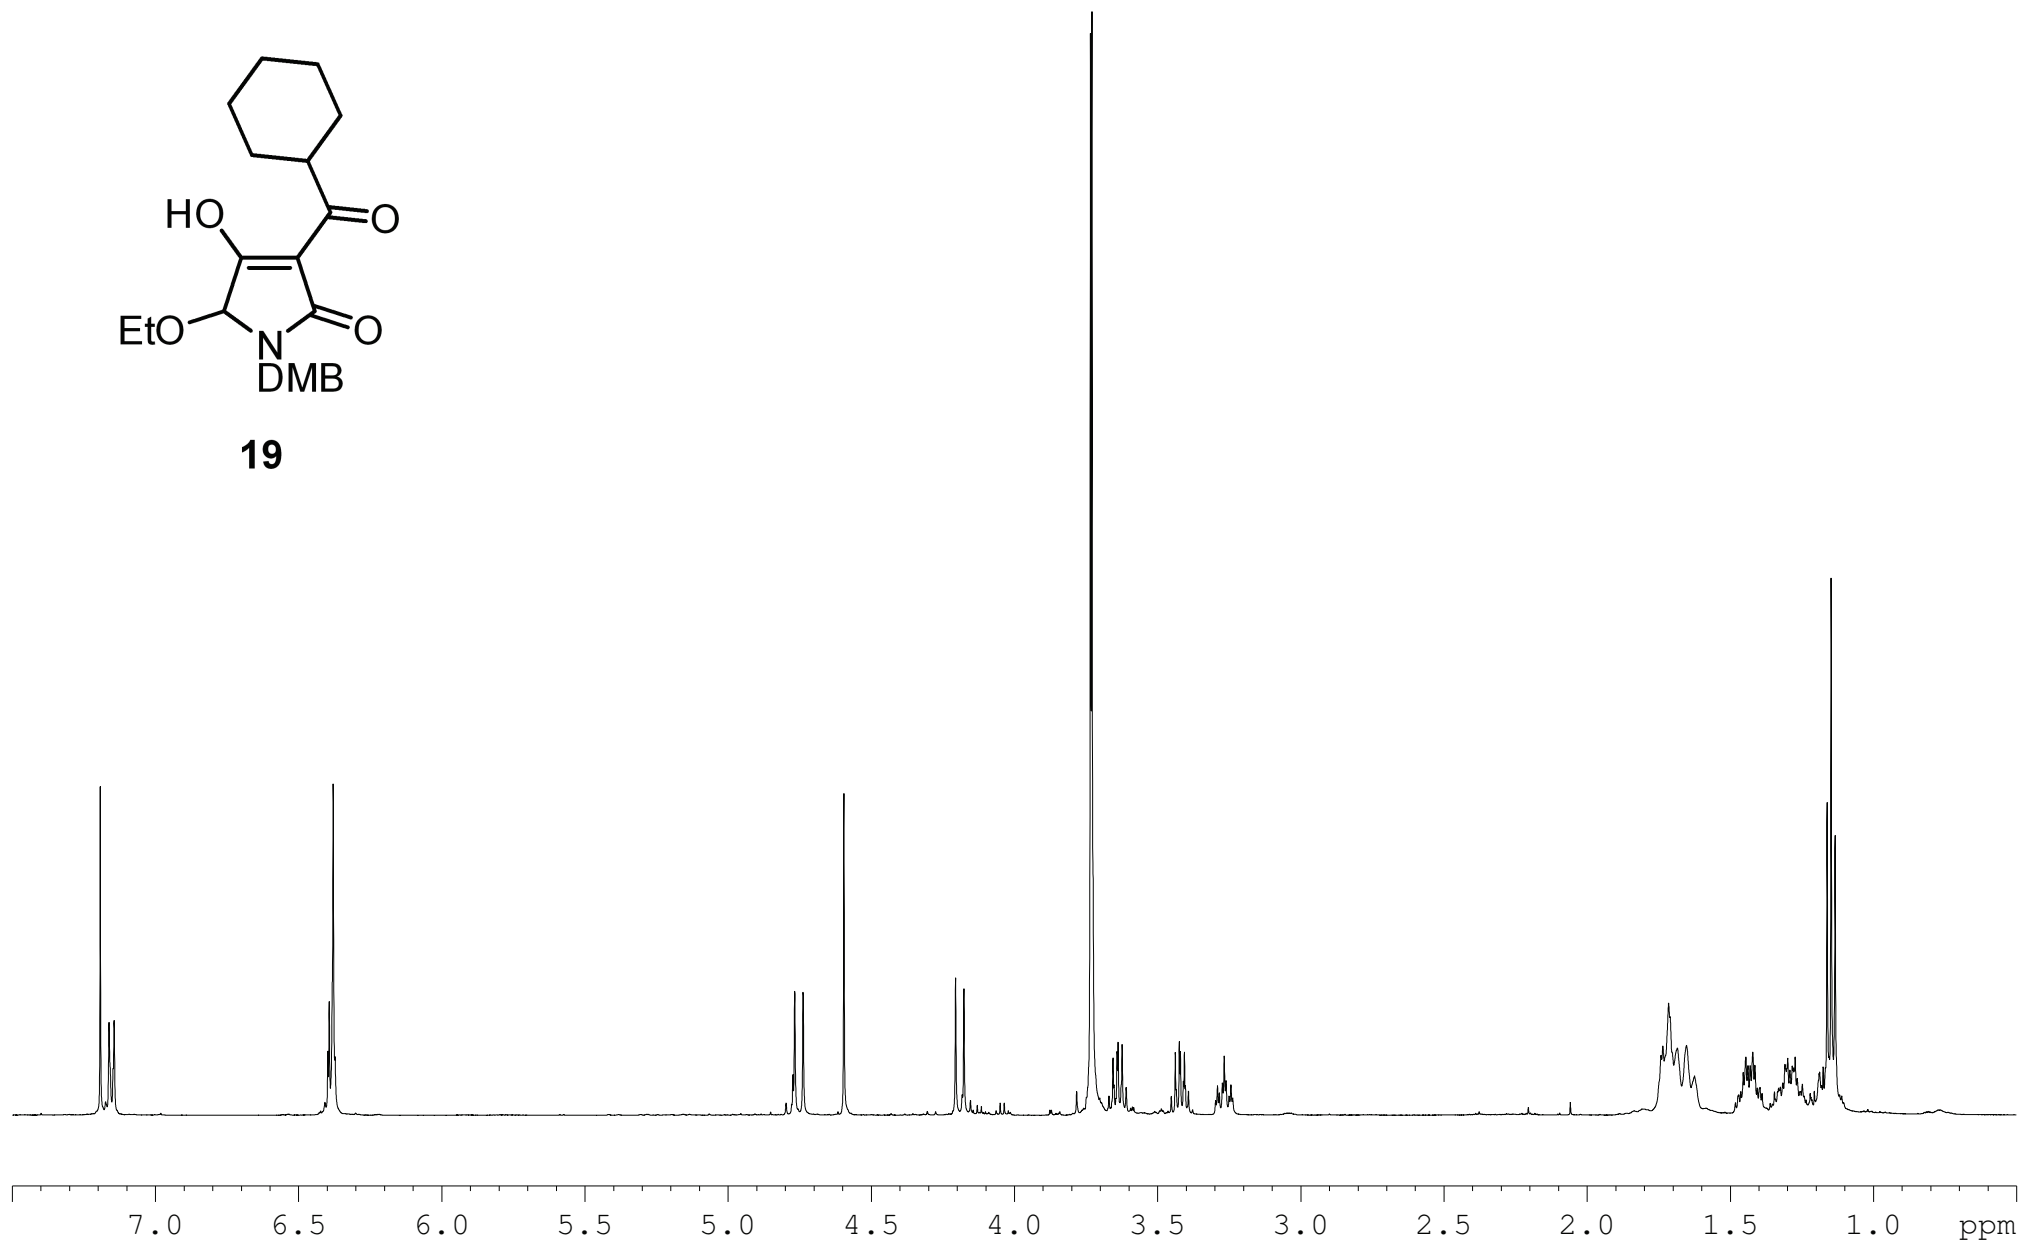

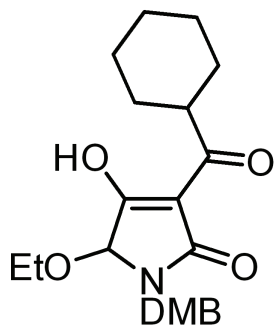

19

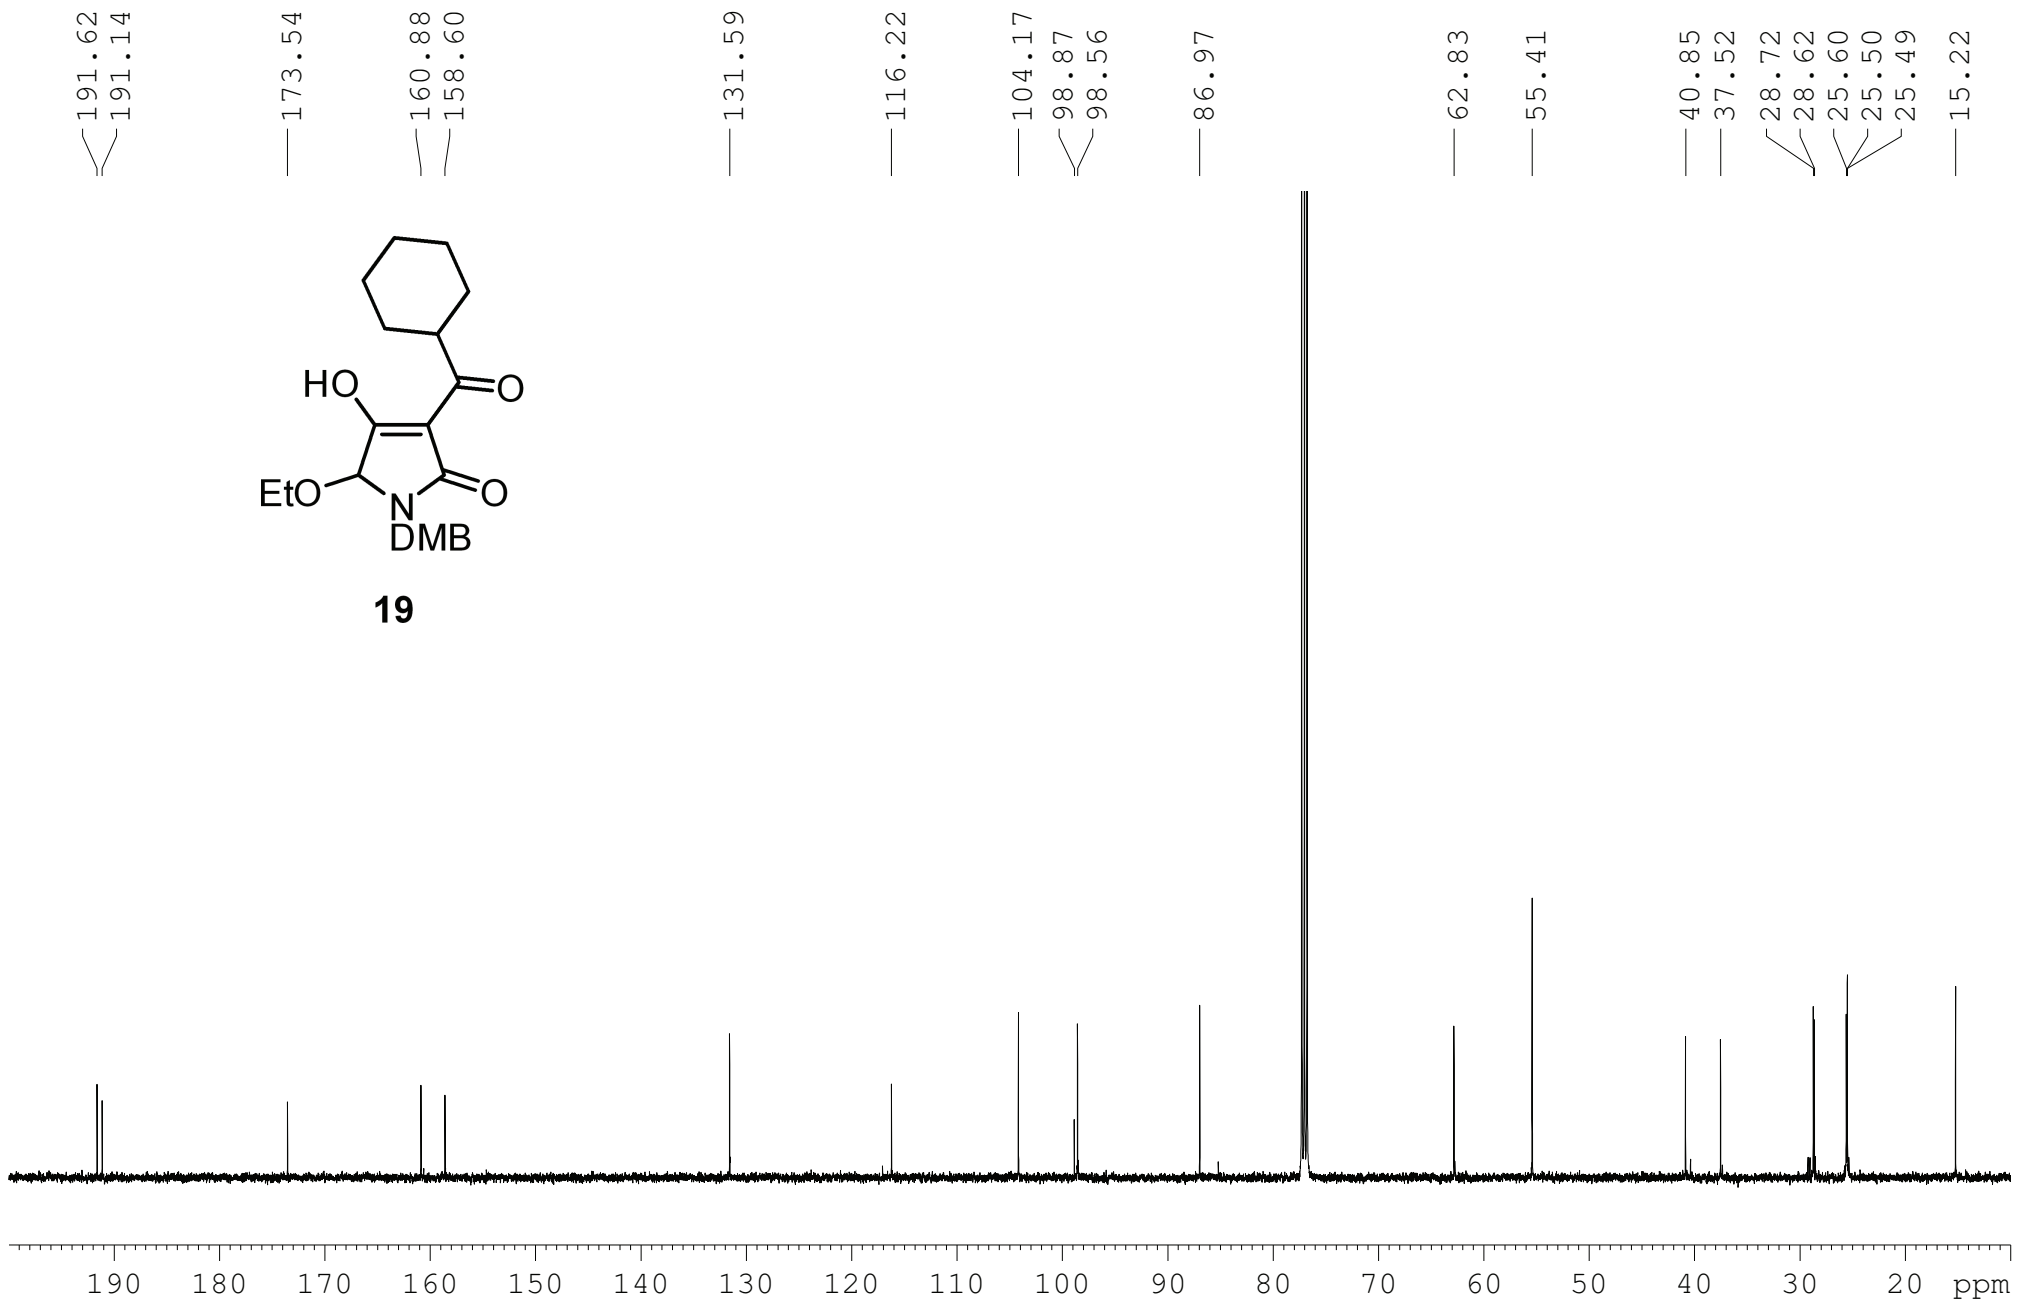

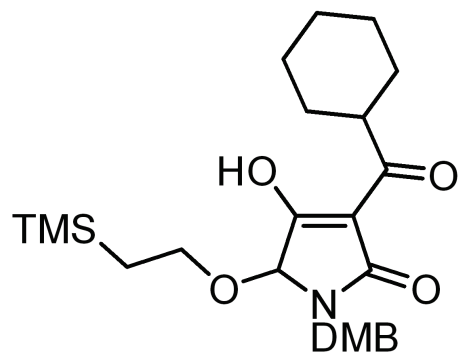

**20**

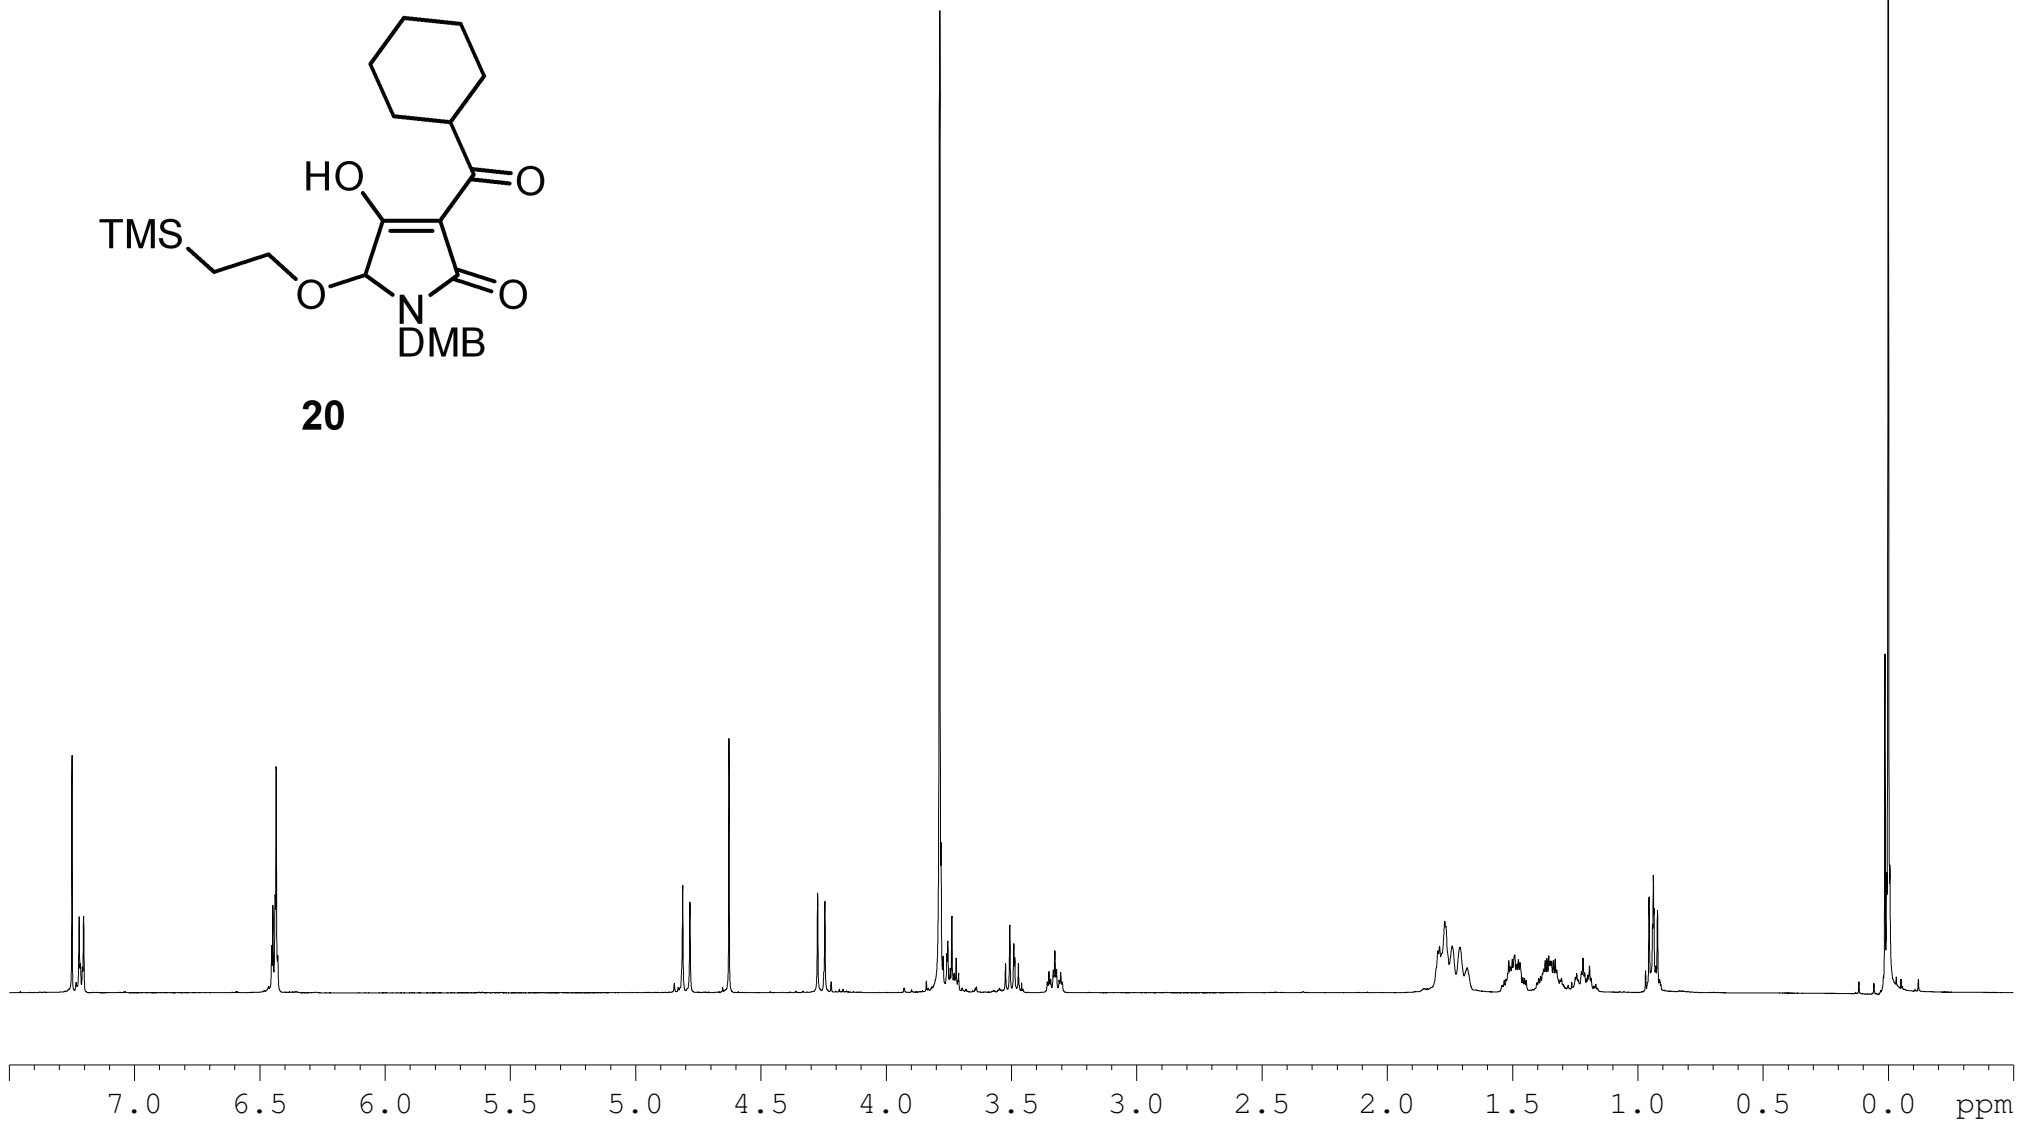

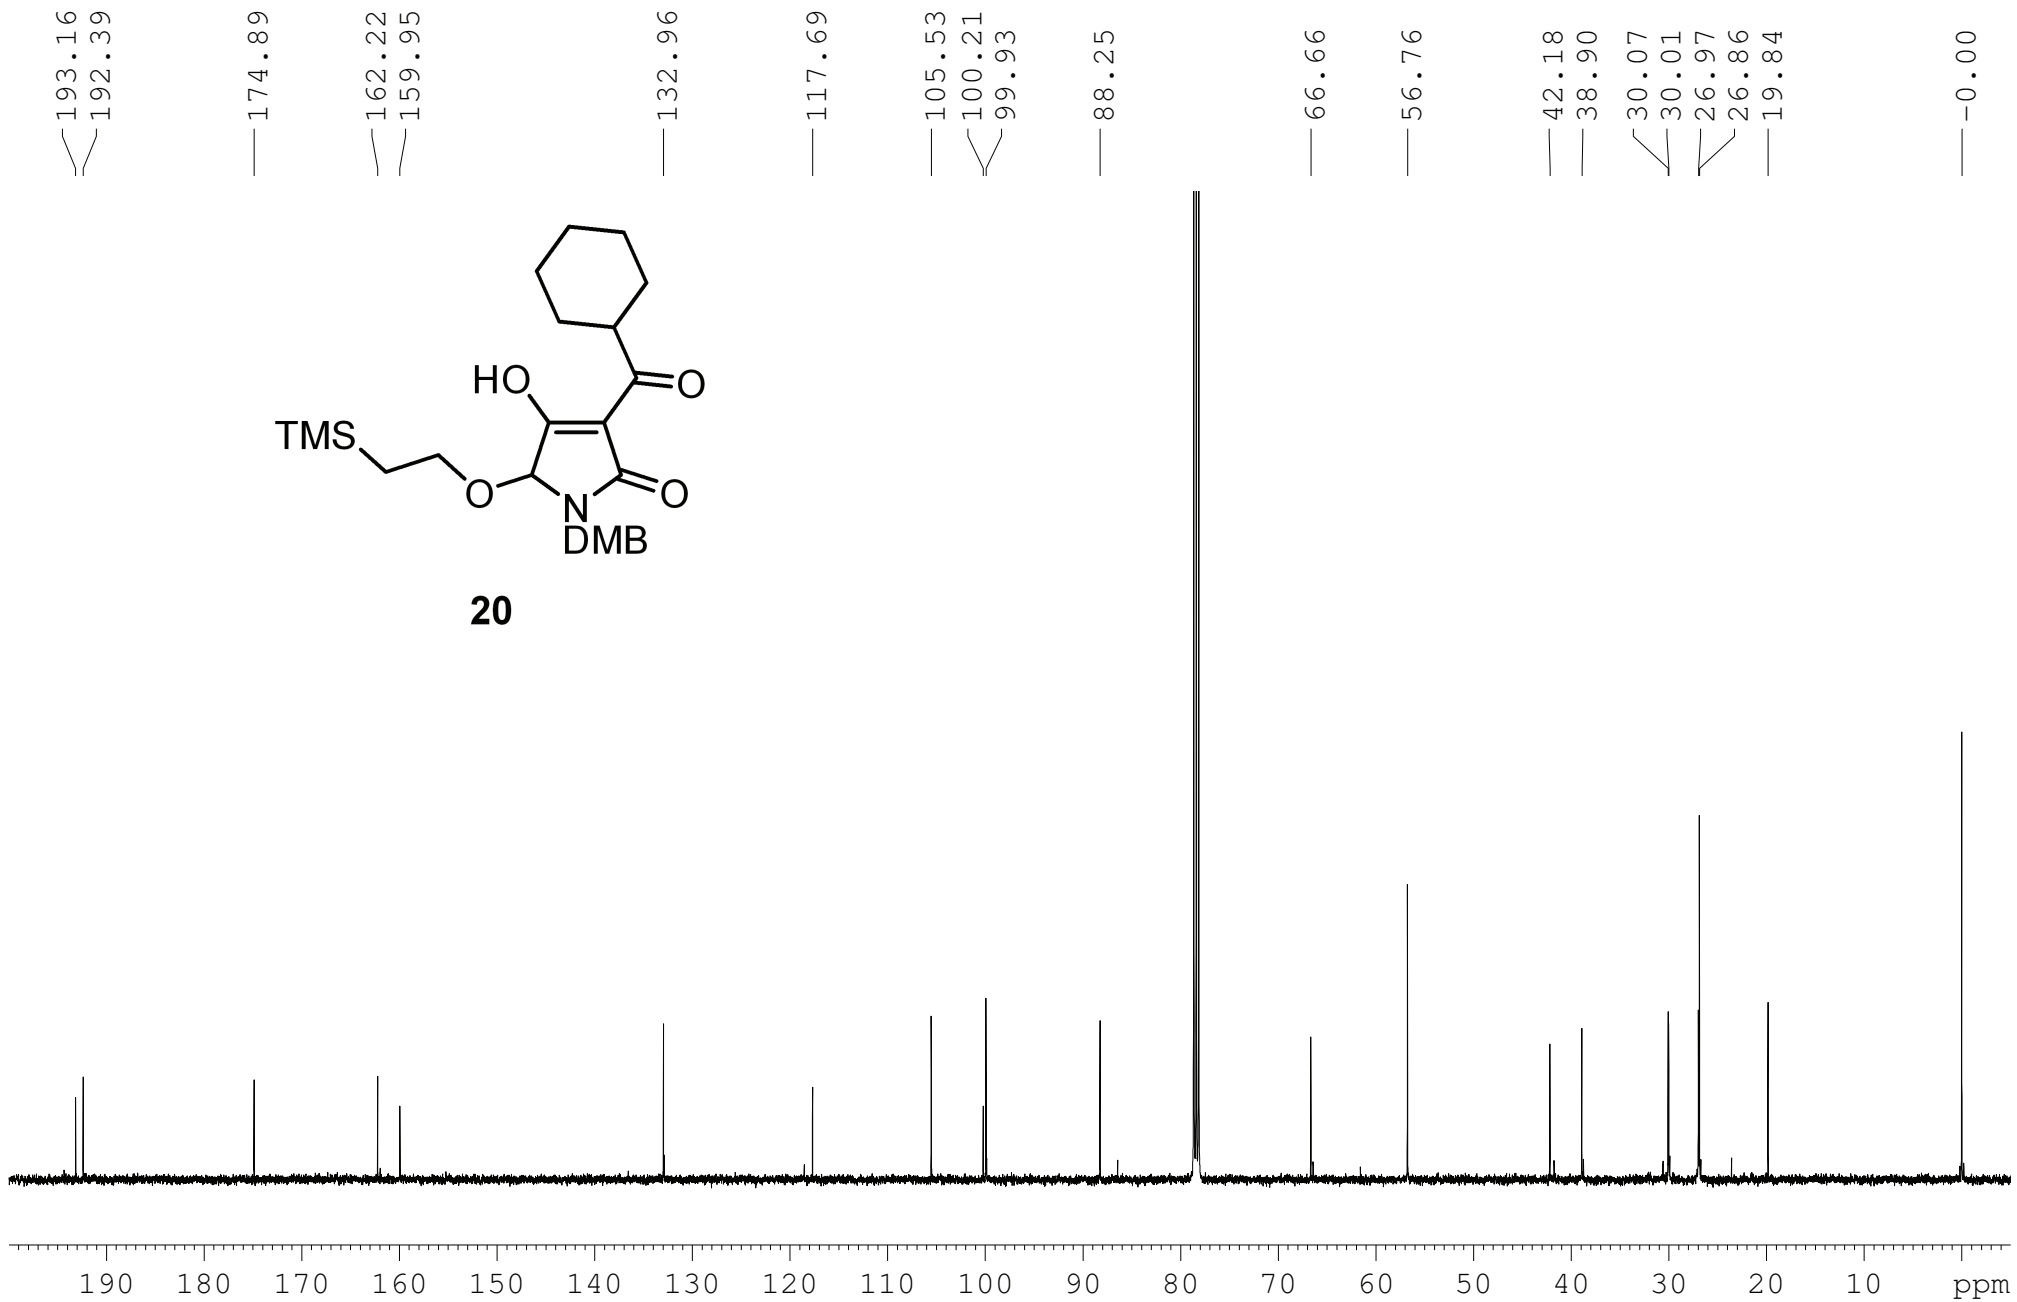

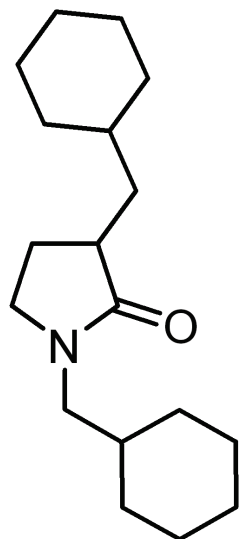

**S2**

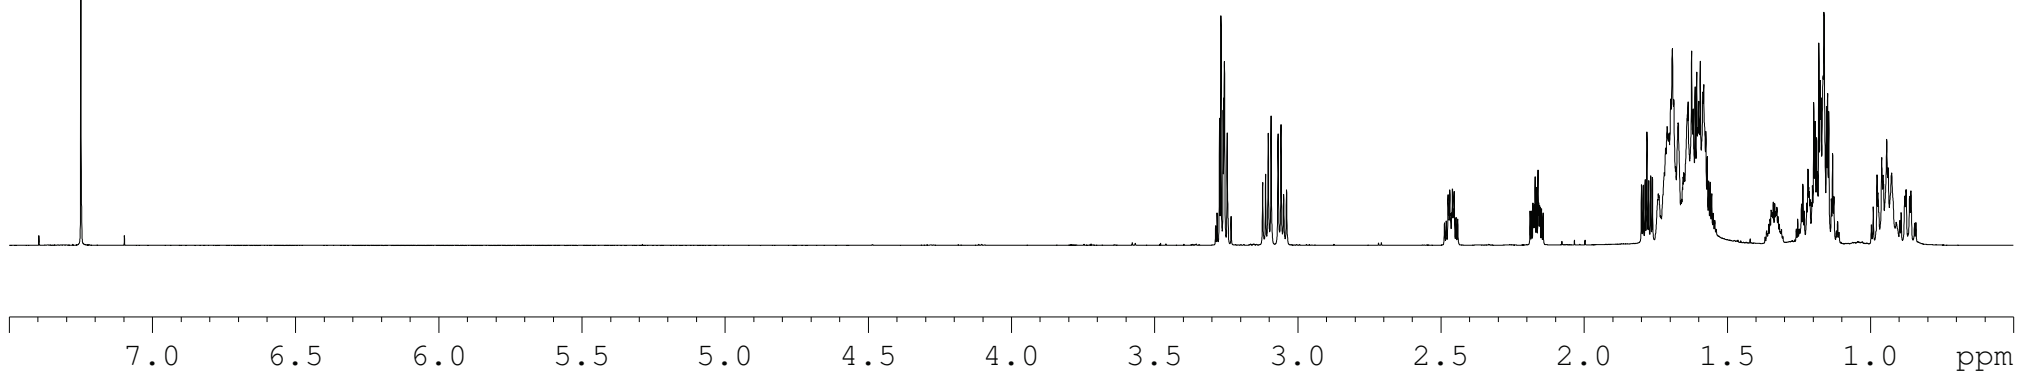



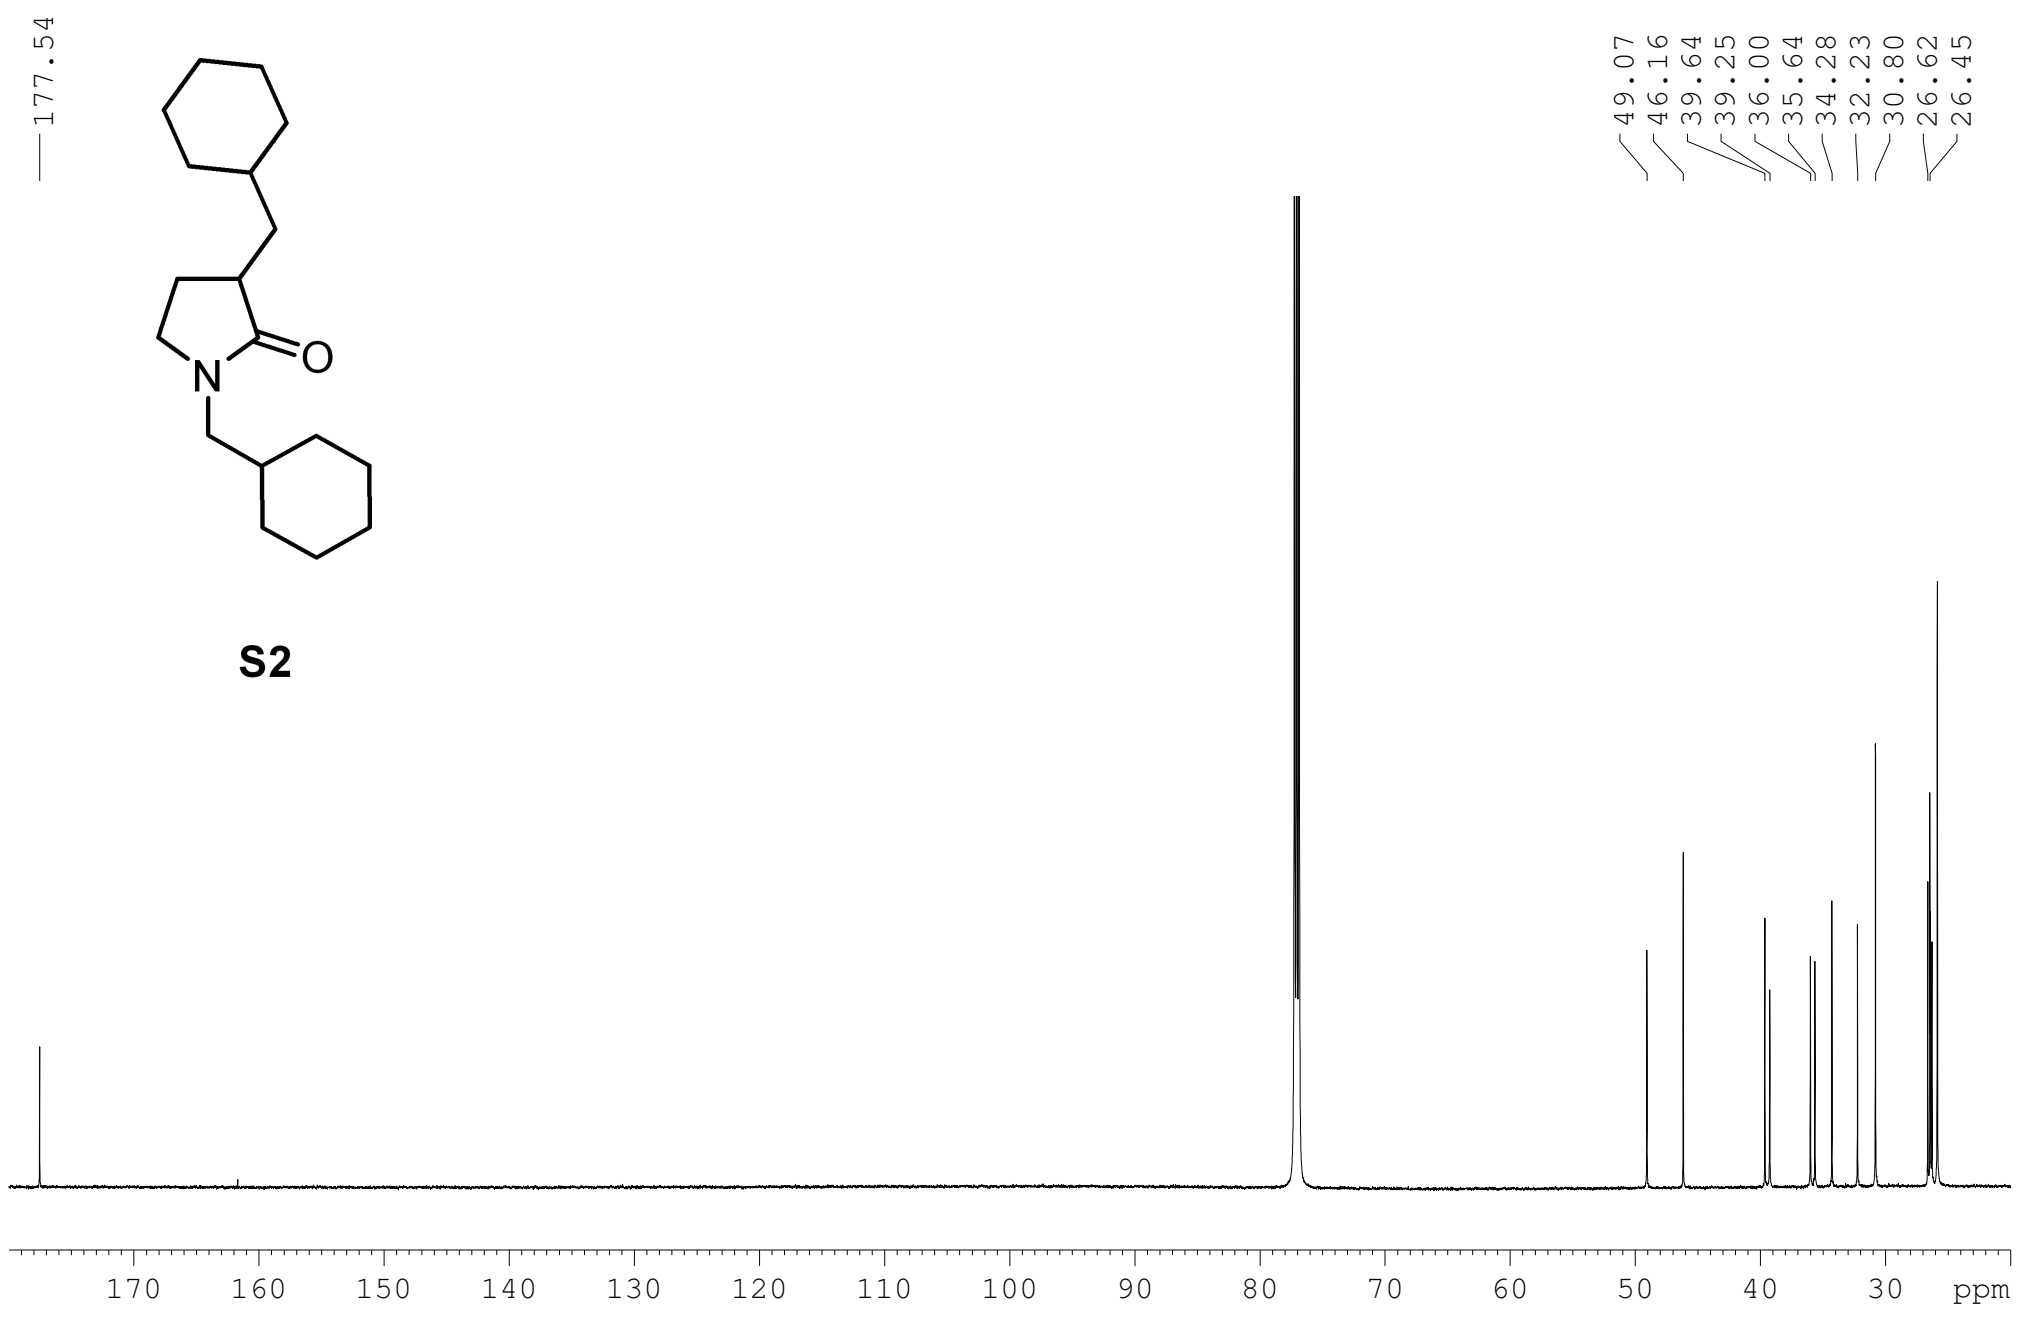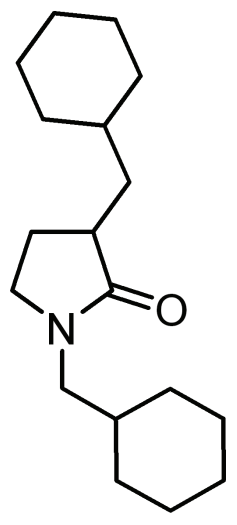

S2

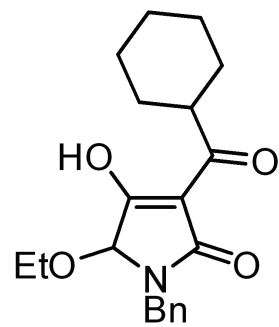

**S3**

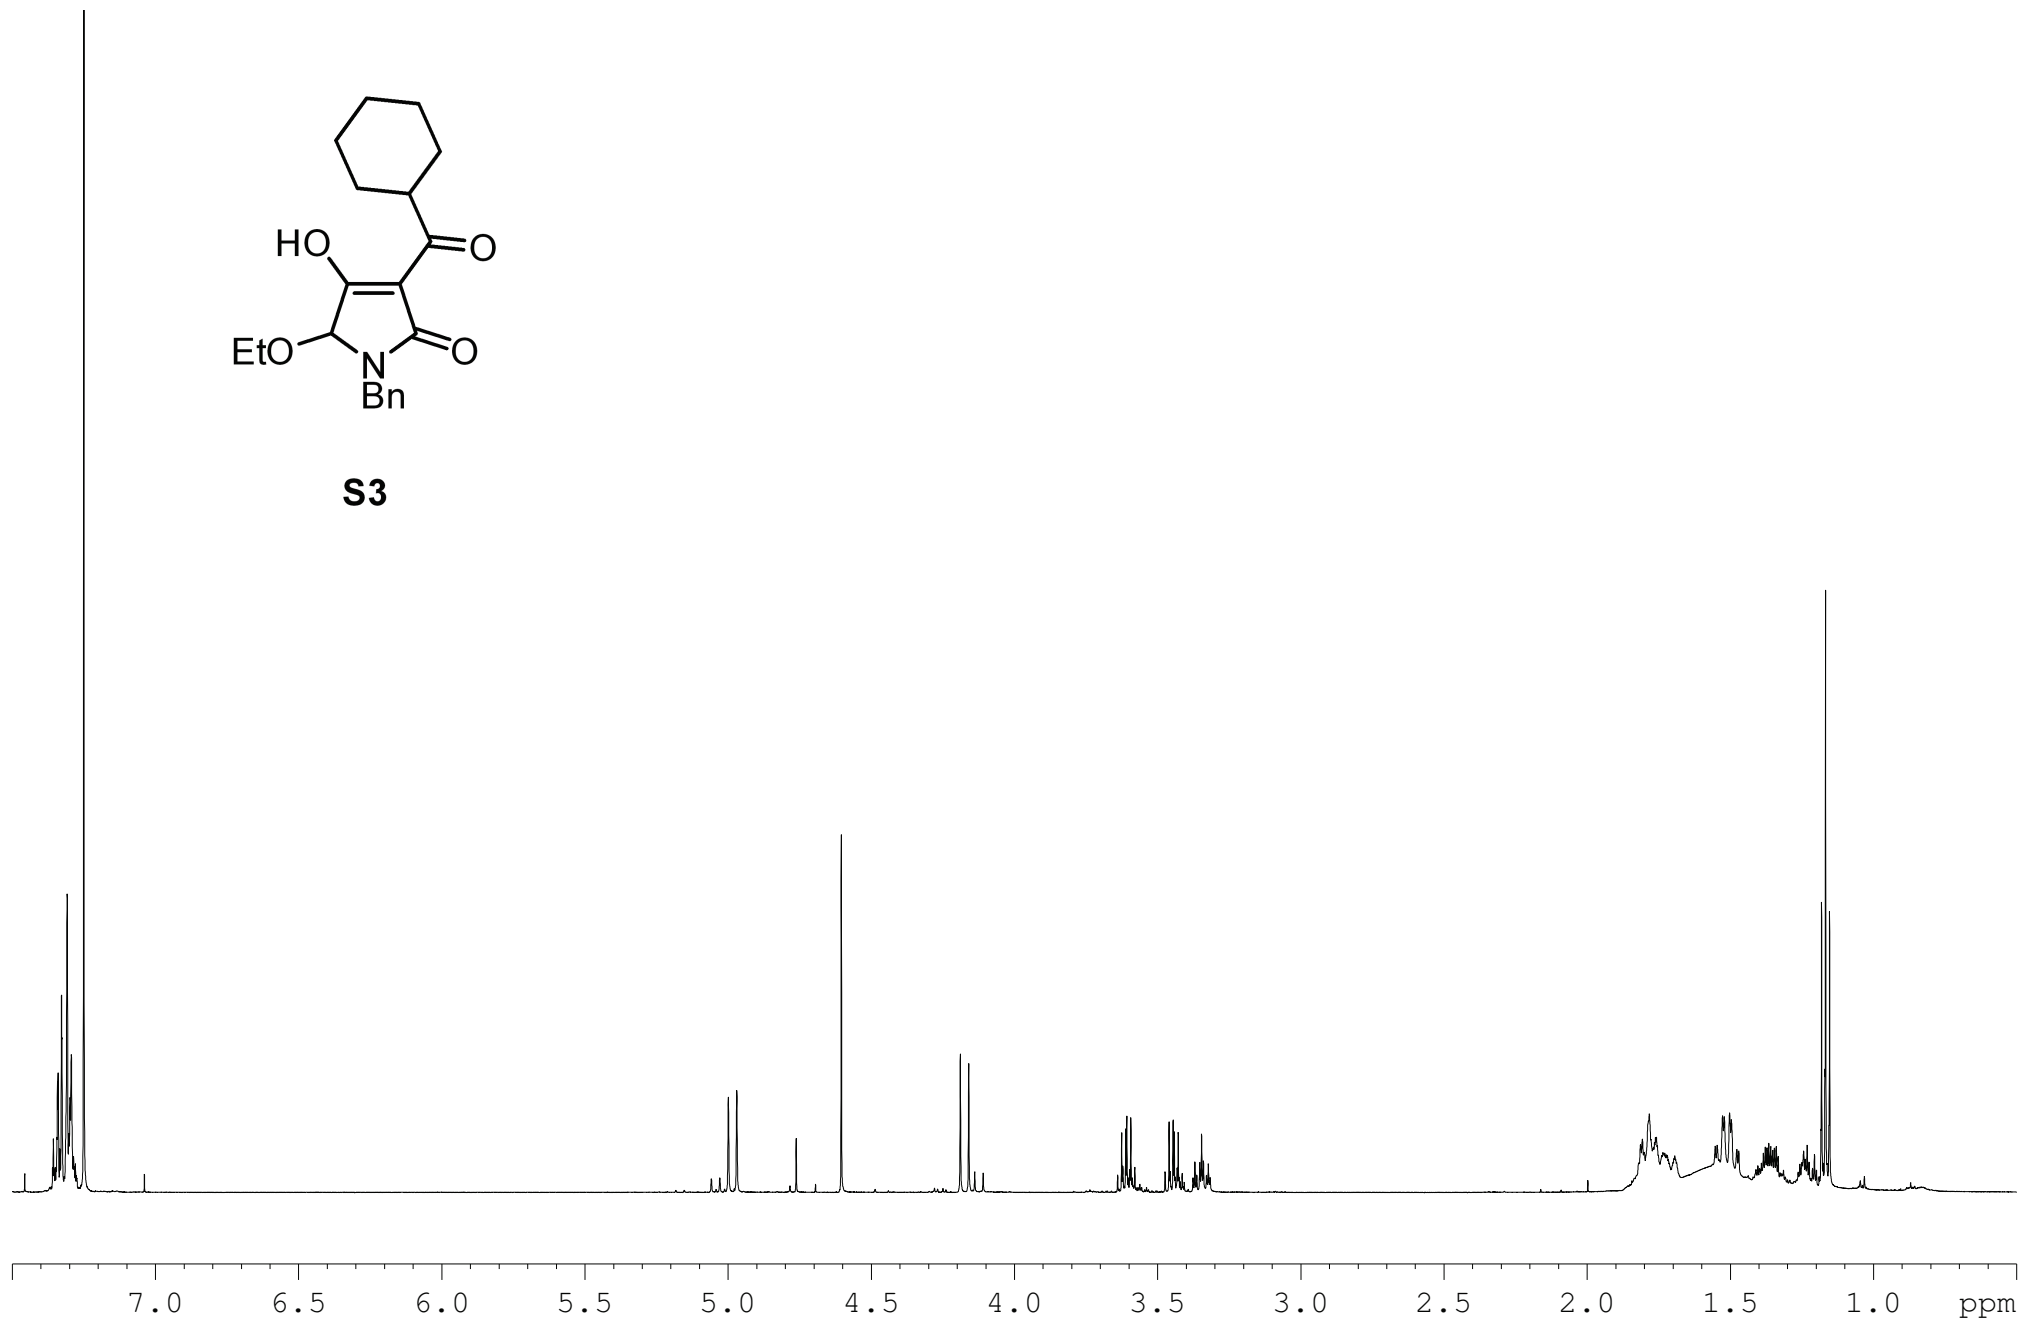

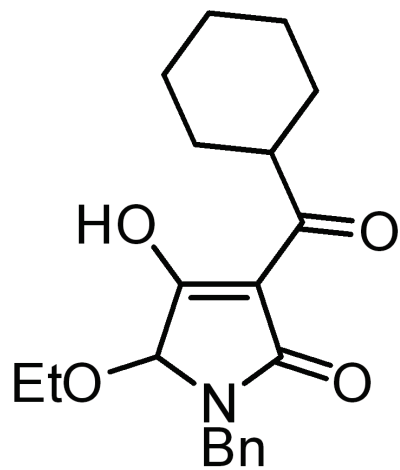

**S3**

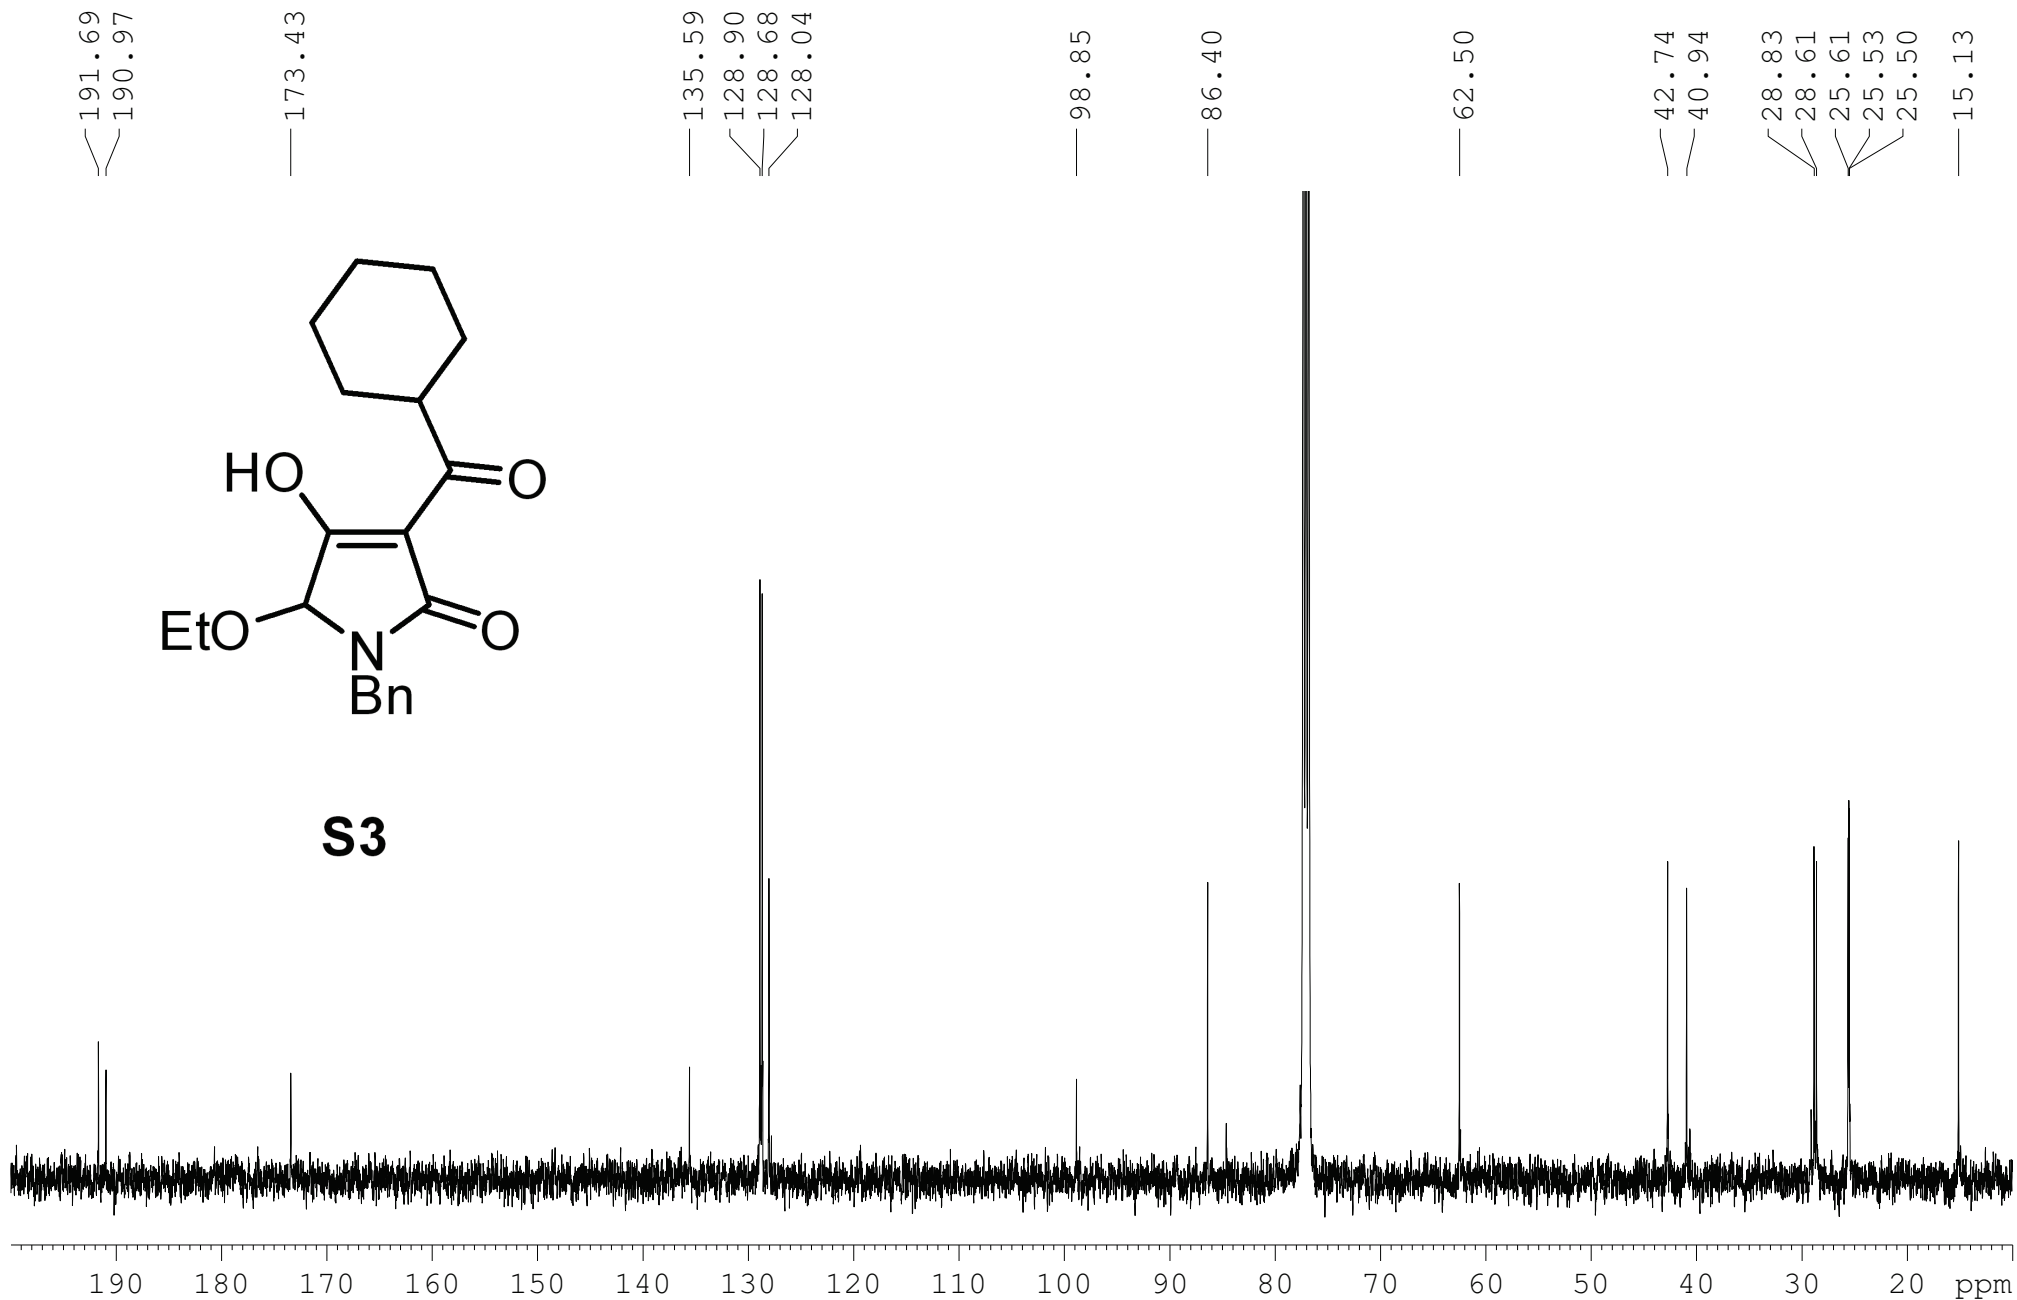

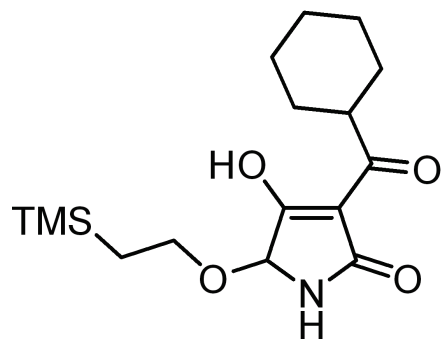

21

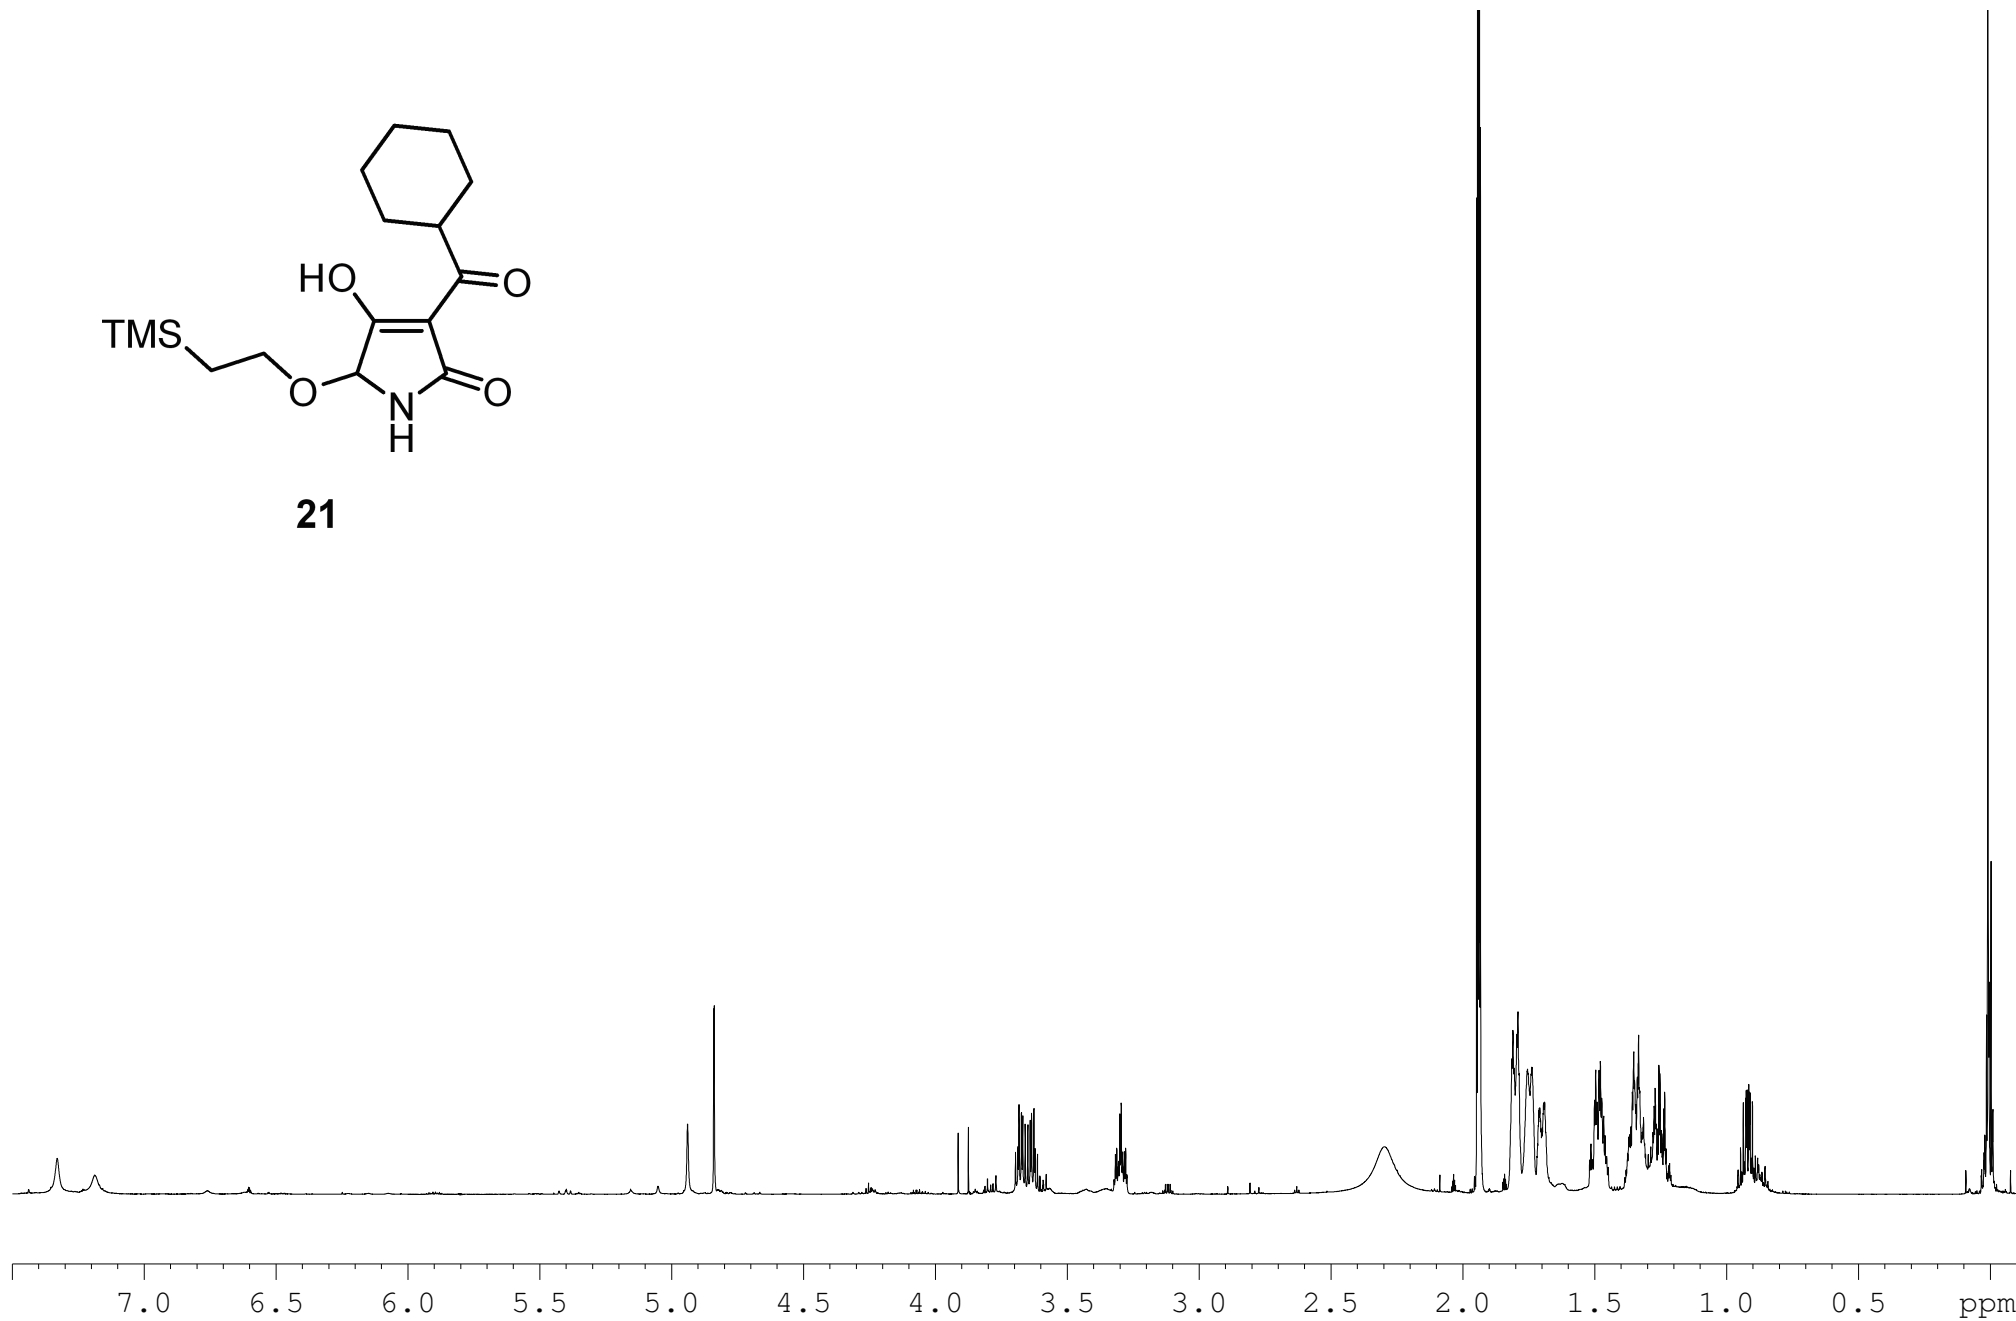

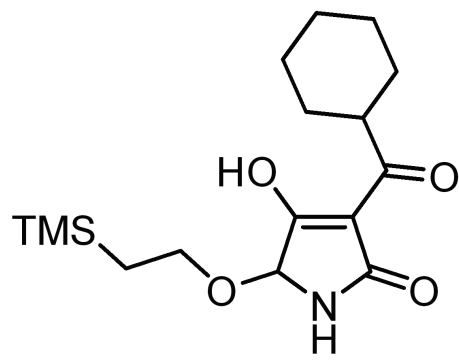

21

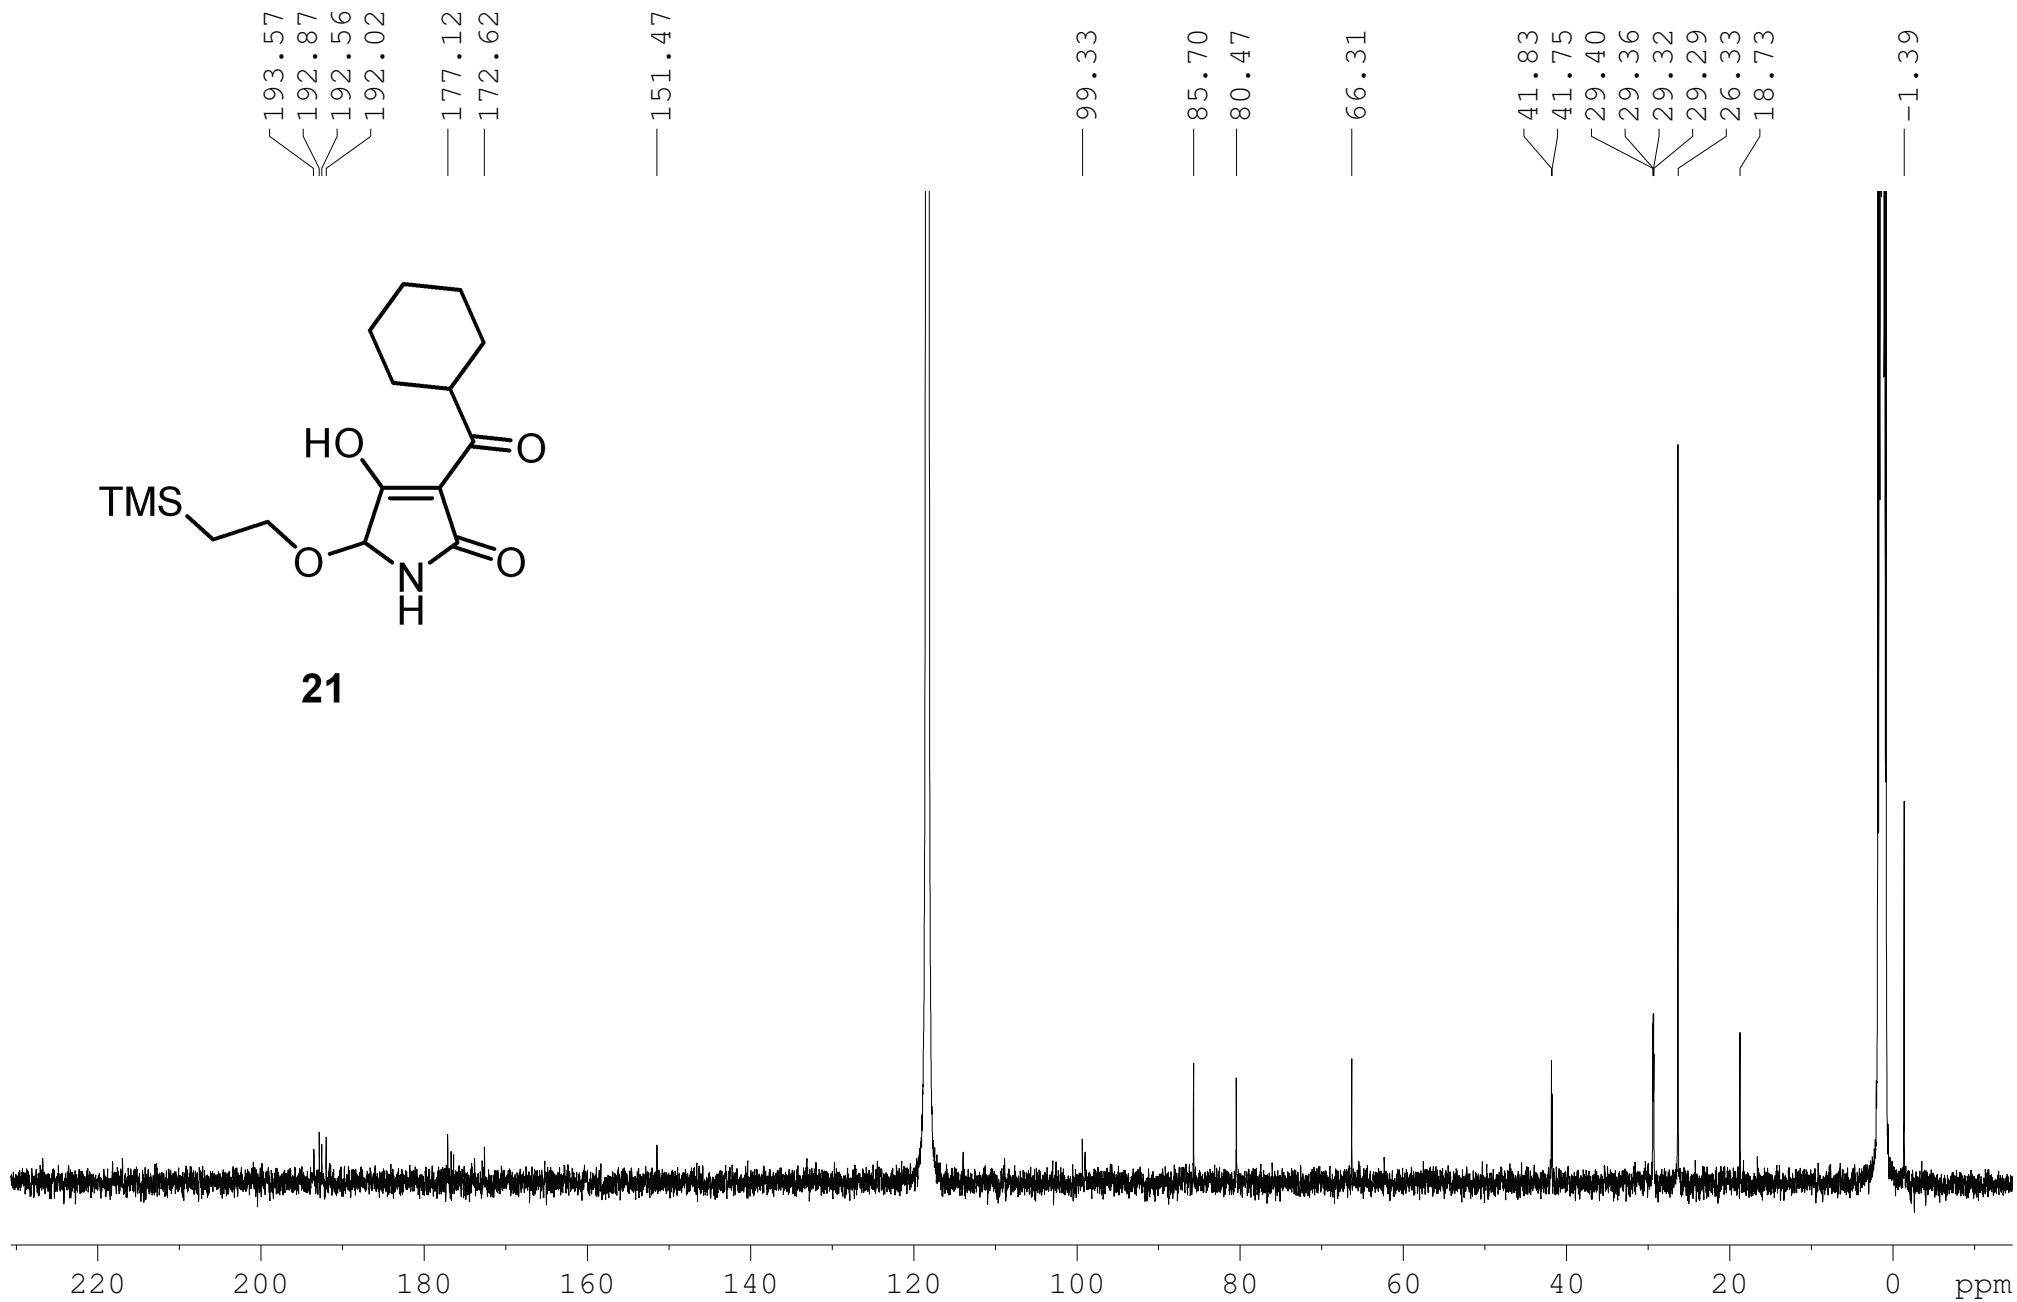

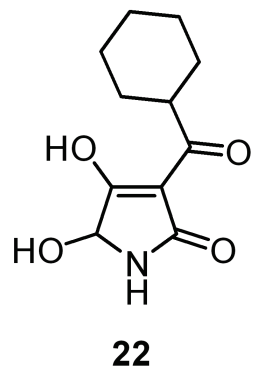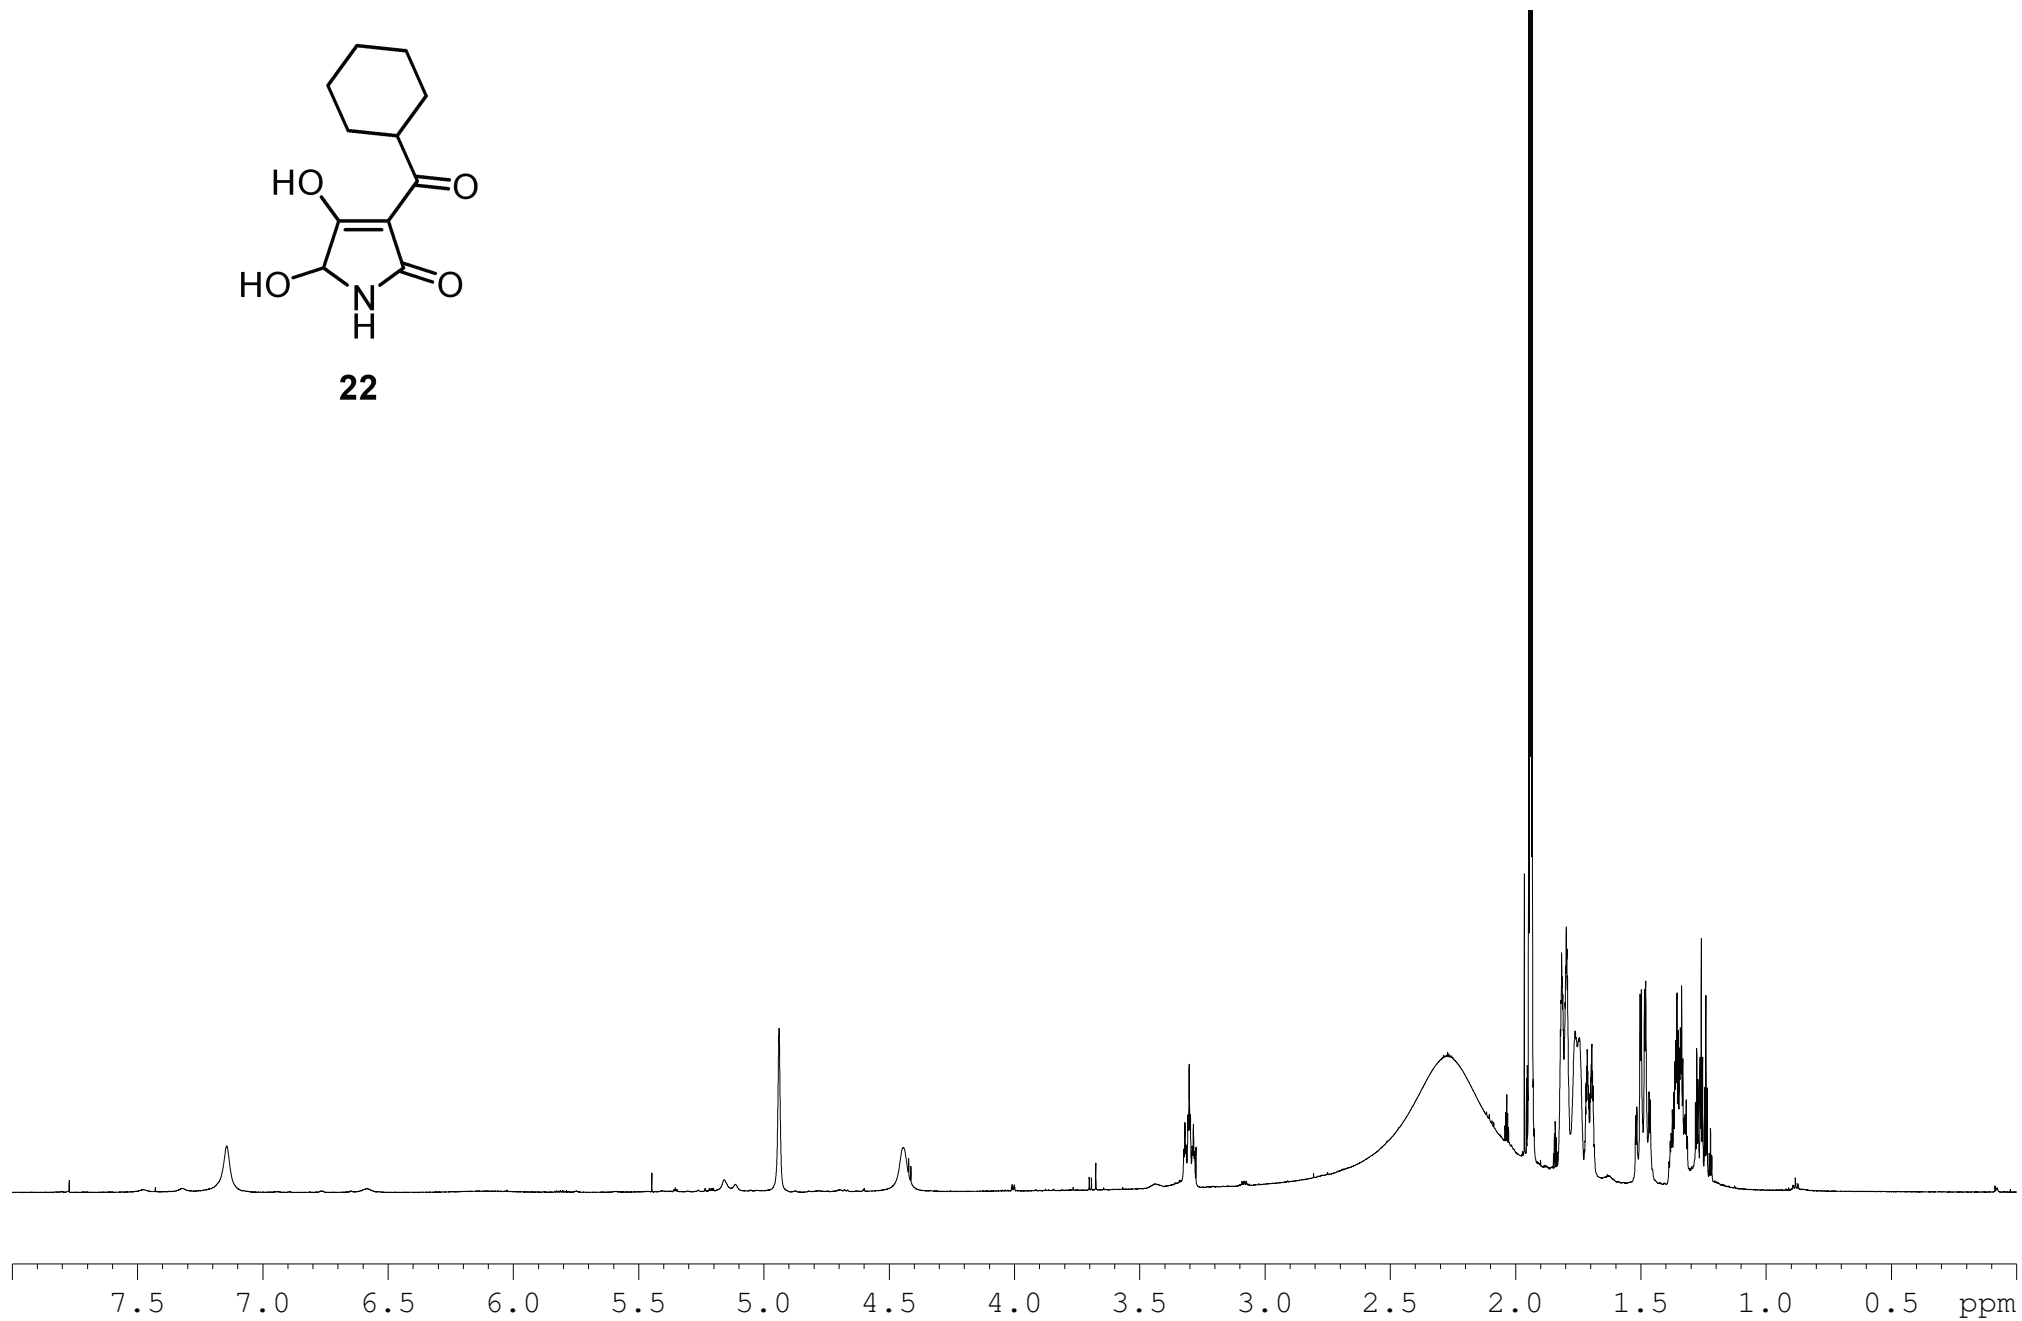

193.44  
192.51

176.67

98.98

80.43

41.72

29.38

29.26

26.33

26.31

26.28

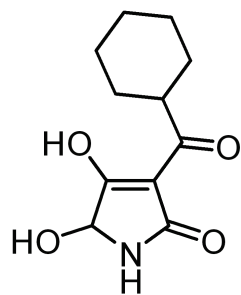

22

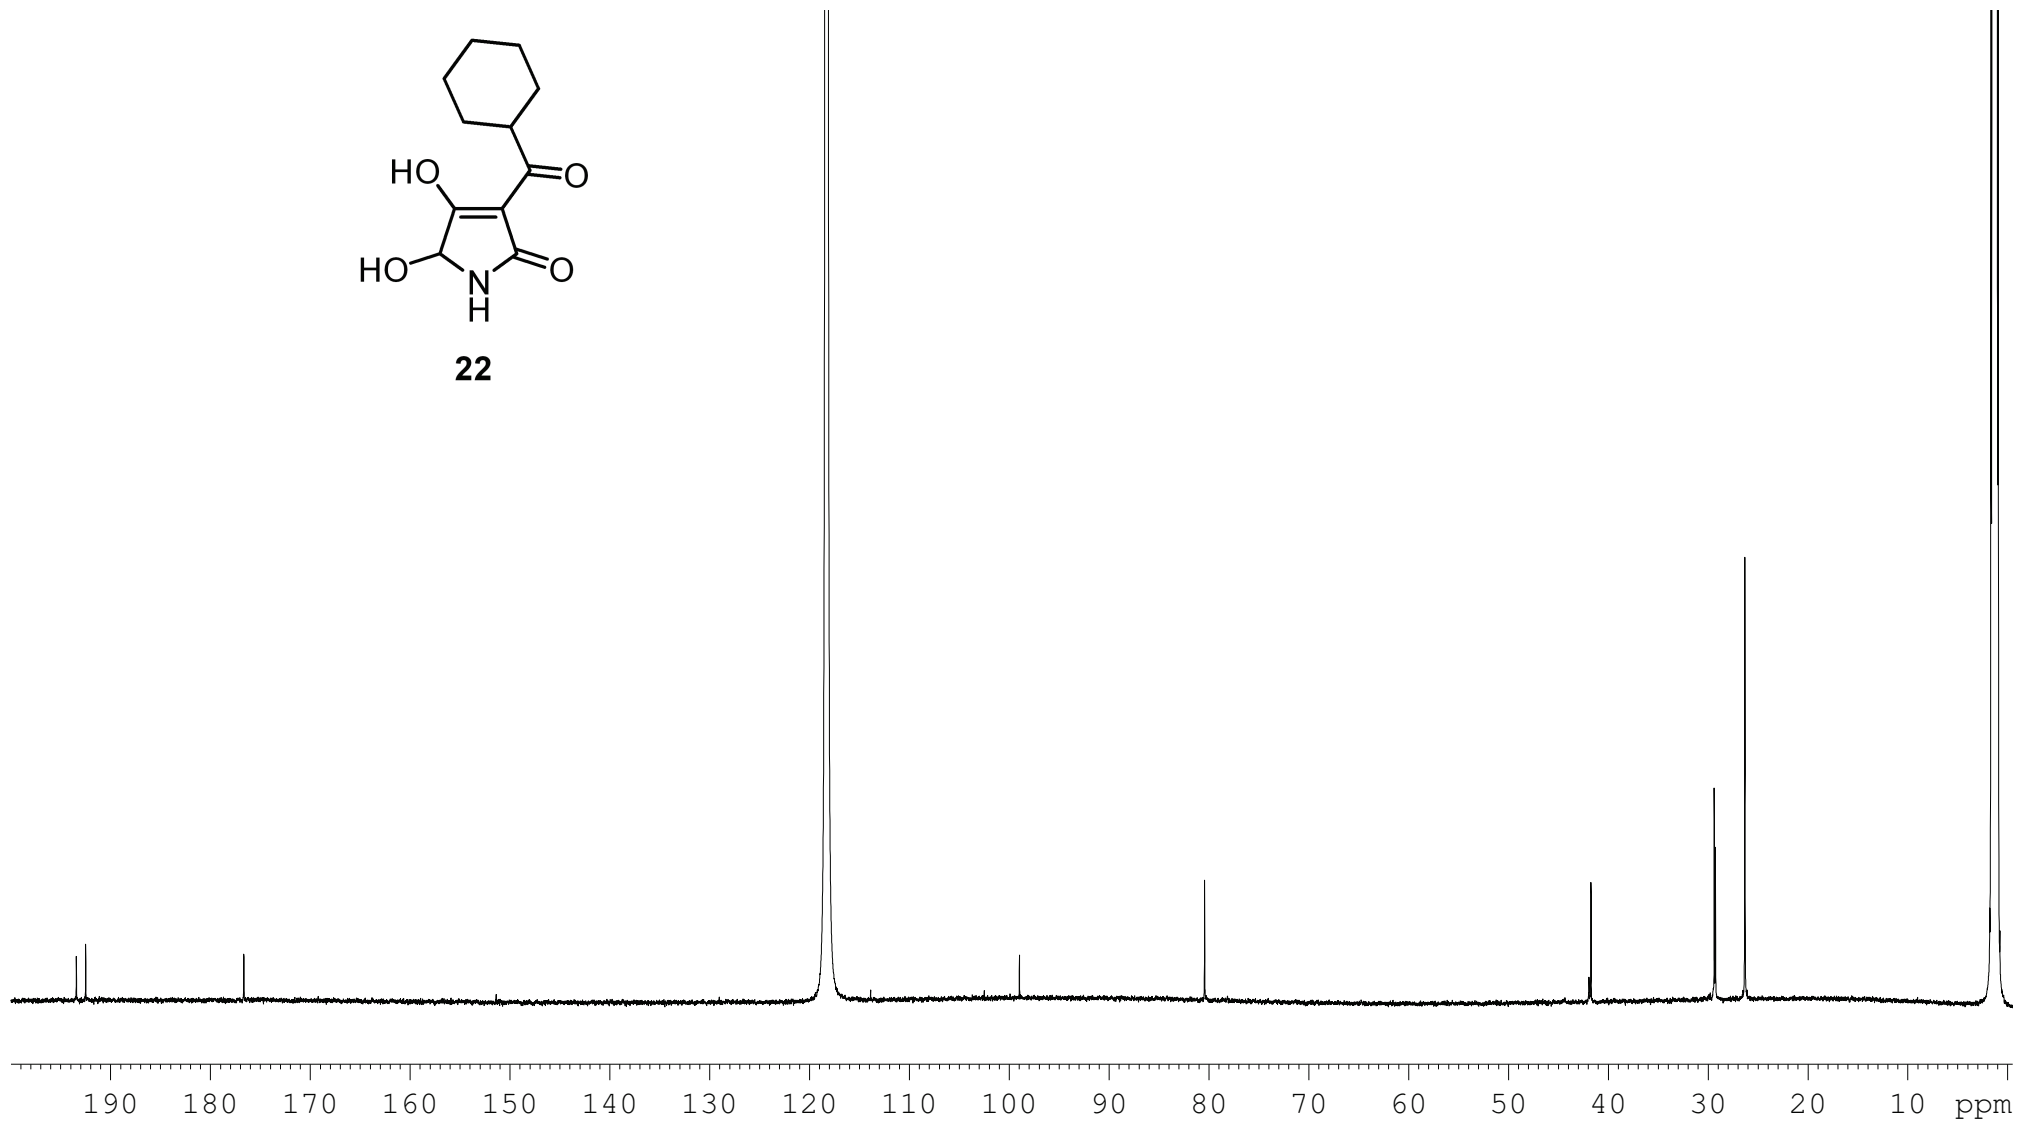

Supplement: Additional file 2 [file 1860-5397-11-37-S2.pdf]
